# Supplementary material for: Sex-specific longitudinal reversal of aging in old frail mice
Source: Aging (Albany NY). 2025 Aug 21;17(9):2252–77. doi: 10.18632/aging.206304 (PMC12517215; doi:10.18632/aging.206304)
Supplement: Supplementary Data 1 [file aging-17-9-206304-s003.xls]

## Sheet: 7 days BONCAT Array 
Raw BONCAT Array Data of Serum Samples
Legend: YC - Yo+A2ung Control OC - Old Control OA - Old Alk5i+OT Treated OE - Old Treadmill OEA - Old Treadmill Alk5i+OT Treated YC 1-4 is AHA, YC 5-8 is ANL OC 1-4 is AHA, OC 5-8 is ANL M: male, F: Female
ID	YC1_F	YC2_F	YC3_M	YC4_M	YC5_F	YC6_F	YC7_M	YC8_M	OC1_F	OC2_F	OC3_M	OC4_M	OC5_F	OC6_F	OC7_M	OC8_M	OA1_F	OA2_F	OA3_M	OA4_M	OE1_F	OE2_F	OE3_M	OE4_M	OEA1_F	OEA2_F	OEA3_M	OEA4_M	YE1_F	YE2_F	YE3_M	YE4_M
Positive 1	1698161	1671860	1567694	1689981	1852195	1529717	1645942	1647853	1388289	1375073	1332834	1494012	1401972	1666612	1612429	1442894	1576394	1495866	1512749	1485536	1386173	1442894	1696210	737480	1498352	700682	739685	737480	1398016	1533775	1638381	1486999
Positive 1	1977929	1986838	1819723	1869921	2159865	1875864	1867874	1921019	1580190	1666098	1615061	1558591	1776829	1946308	1837814	1689667	1887882	1710332	1718283	1805774	1589435	1689667	1938428	1074962	1692335	971960	998306	1074962	1652917	1757037	1868040	1862632
Positive 2	839969	827811	843533	863279	911013	760548	778650	781163	655290	754460	724886	645853	836781	917825	933644	779046	818974	743384	789000	740255	756154	779046	901890	376440	804187	315206	344654	376440	805497	742574	810195	805471
Positive 2	934613	910057	849959	902175	1012309	787367	819080	806671	662933	805287	792731	635689	846607	985961	977943	811219	857570	728935	811990	840530	765392	811219	957084	385132	861876	424725	403028	385132	826205	772754	809906	850969
Positive 3	903128	920256	908928	882451	1016130	851588	821184	872671	744772	740044	750873	710079	861739	931756	918751	770127	820806	771047	733587	774755	731845	770127	891271	284196	816598	289646	283936	284196	842890	833862	785667	797177
Positive 3	987929	971011	914001	919190	997698	887930	927946	897671	757120	828749	811572	760691	939847	999432	963848	913311	796878	786327	762177	855608	766579	913311	976265	307270	874835	317054	281906	307270	898995	916220	966138	975101
neg	8584	7294	7585	7683	9829	9611	8715	11894	4976	5401	4920	15284	5124	4501	4525	6847	5631	5757	9206	7332	8261	6847	5603	5747	7144	4298	5335	5747	69687	10687	11164	16001
neg	7524	7199	7968	8072	9007	9839	9017	11643	5038	4845	5044	5052	5469	4648	4636	7045	5249	5113	9345	7015	8703	7045	5113	6453	7032	5919	6028	6453	15966	8499	10564	15737
6Ckine	7681	6746	7600	6598	9389	6268	7418	7042	5547	5578	5751	5252	5662	5395	5139	7159	5658	5426	7339	6255	7207	7159	5470	14411	6551	16023	15968	14411	9556	7689	8400	8870
6Ckine	8109	6918	7494	6744	15004	7388	7246	7216	5573	4552	4765	5532	4936	4752	4909	7196	6287	6001	7596	6464	7892	7196	5813	17626	7742	18107	18531	17626	9162	8185	7886	8701
Activin A	6623	6023	7068	4856	32787	8064	7307	9246	4743	5498	6154	5018	5796	5101	6541	7042	5461	5620	8885	6939	7502	7042	5354	5392	7075	4900	4447	5392	6960	7407	7907	10445
Activin A	7206	6467	7037	6479	11133	7105	7139	7754	7215	5300	5629	5333	5550	12297	5608	7070	5346	5420	9283	6612	8493	7070	5350	5146	7587	4948	5042	5146	7217	7822	8711	8607
Activin C	7187	5995	6114	5363	14397	6808	6965	7611	10248	5593	5652	5616	5899	5473	5288	7561	5540	5205	9931	7089	7737	7561	6202	5652	7325	4883	4972	5652	8697	8450	7619	9929
Activin C	7096	6527	6625	6612	8828	7344	7095	8754	7846	5386	5419	5429	5859	5567	6073	7476	5542	6105	10066	7378	8227	7476	5678	5377	7803	4892	4923	5377	8592	8397	6729	13008
Activin RIB / ALK-4	6130	5497	6073	5876	7647	6142	6273	6655	5036	5302	5910	5124	6276	5735	6122	7565	5621	5691	7068	5968	7826	7565	5829	4934	7212	4928	5087	4934	6522	6391	6804	9624
Activin RIB / ALK-4	5759	4940	6815	5014	7944	6482	6465	6741	5188	5134	5046	5322	8613	5419	5297	6578	5580	5508	8423	6679	7564	6578	6084	4904	12183	5148	4898	4904	6516	7990	7568	8861
Adiponectin / Acrp30	7219	7415	9163	9150	8997	10478	7599	12583	4990	4984	4877	5519	6321	9032	7311	9228	5416	5577	10623	7202	8708	9228	5695	7340	9120	4976	5511	7340	18797	12840	18453	31978
Adiponectin / Acrp30	7449	7130	9113	9200	9476	9781	8514	15188	4977	4816	4947	5123	5494	8585	7386	9857	5329	5441	9756	7155	8009	9857	5953	8106	8498	6017	6622	8106	22315	14252	23243	37183
AgRP	12332	11236	14628	13093	14895	20607	18128	30443	23130	26510	20833	30562	13943	14124	12367	21568	12059	12231	14595	13047	43281	21568	12929	9743	23590	8507	7903	9743	26317	18624	16375	36444
AgRP	12452	11290	15601	12687	16219	23640	18320	34440	26738	24392	21752	29903	11547	13776	13054	19762	11163	13055	14803	11909	23208	19762	12882	9298	38528	9822	8428	9298	32967	19434	25360	46433
ALCAM	7327	5858	7644	7045	7973	7506	8477	9221	4968	5054	5114	5384	5704	4875	5627	7257	5188	5376	10126	7247	23080	7257	6018	4858	7128	4382	4666	4858	9330	7377	7727	8187
ALCAM	6856	6267	8132	6922	12169	7761	7352	8986	4866	4701	4952	4971	4961	4909	4774	7226	5161	5682	9711	7051	7542	7226	5809	4655	8268	4842	4631	4655	8300	7943	7950	8741
Angiopoietin-like 2	6597	6375	6937	6510	9725	6270	5861	7971	4865	4904	5120	4435	6213	5097	5535	7020	5428	5129	8297	6661	8039	7020	5961	5217	7740	5260	4912	5217	7313	6113	7159	7221
Angiopoietin-like 2	7421	6553	8320	6910	9372	5779	5870	7199	4665	5401	5265	5155	7043	5199	4915	7426	5234	5360	9269	6834	7617	7426	5278	5308	7432	5065	4910	5308	7780	6168	7356	7787
Angiopoietin-like 3	7512	7365	8168	7398	9357	7659	7792	9780	5271	7844	6589	5657	7346	5666	5703	7343	5585	5592	8538	7653	8742	7343	6708	5176	8326	5369	5002	5176	12976	8020	7896	8366
Angiopoietin-like 3	7743	6454	8295	6698	9835	8681	7907	11374	5436	6184	6248	5258	6657	4833	4902	7397	5764	6057	9164	8212	7892	7397	5652	5831	8672	5379	5010	5831	8556	7810	8696	12147
AR (Amphiregulin)	7125	7293	9859	8686	9835	7021	7134	8684	4990	5208	5752	4890	7179	5811	4794	6427	5289	5772	10230	8959	7541	6427	5100	4353	7339	4531	4460	4353	8606	7163	7098	9906
AR (Amphiregulin)	7060	6721	9623	8168	9263	6723	7049	7880	4891	5376	6174	5464	7049	4805	4697	6621	5500	5678	8738	8191	8117	6621	5460	4722	7973	4594	4324	4722	7187	6072	6408	9323
Artemin	9546	9346	10528	9610	27223	19059	14050	18384	6247	7612	6987	7779	6724	6403	39804	8492	7870	7610	9198	15000	12766	8492	5891	8555	11310	6833	6486	8555	75555	19060	18268	105217
Artemin	8953	8096	9947	7589	29637	19408	15681	21102	6336	6966	6757	7092	7011	5926	16442	12343	8036	7282	7861	139394	16600	12343	5913	10350	14659	6245	6913	10350	115651	17677	18022	105759
Axl	4853	4117	5254	3853	8162	8711	6255	9854	3242	3595	3433	3653	3905	3373	3953	4217	3719	3353	5750	4518	5165	4217	3606	3532	5134	2776	2936	3532	10374	4884	5922	7146
Axl	7097	6743	8698	6645	11417	11759	9487	13893	4814	4975	5126	5297	5699	4634	4232	6856	5645	5304	9181	6693	8443	6856	5544	6166	7449	4448	4789	6166	16862	8085	9119	13737
b FGF	14251	14860	16186	12877	24880	16951	17216	22031	13535	11685	12636	16353	13606	11379	13272	18170	14152	13813	17215	15094	19074	18170	12667	13082	18777	9495	11667	13082	25425	18786	21730	24755
b FGF	11326	12715	12771	10865	20451	13621	13261	16772	10607	9836	9828	14052	11957	10676	10407	12998	12448	11079	13966	13303	14507	12998	9924	10453	14090	6986	9482	10453	17740	24886	18120	20370
B7-1/CD80	17436	16401	17409	14812	24912	18482	18056	26701	15403	13719	13927	15602	17580	12430	14109	20884	15120	14694	16158	15370	21374	20884	16606	9114	45728	10972	11129	9114	21135	20345	17087	21982
B7-1/CD80	17668	17127	17011	13746	23485	18327	18295	21599	16256	13642	13355	17189	16142	12197	15689	24075	27414	15678	16652	15842	35744	24075	16882	10339	21423	11819	12457	10339	20979	31857	19884	21756
BAFF R / TNFRSF13C	33542	32200	31125	29595	40810	32867	32682	39561	28185	24298	22997	27928	29451	27821	29913	27973	22232	24441	24743	23793	30702	27973	30666	17196	27926	16073	18220	17196	39829	42782	44333	57098
BAFF R / TNFRSF13C	37295	34474	29125	29038	40710	32177	34095	42266	29342	21592	22857	28621	32470	29465	29012	27213	20643	24021	26097	23983	30465	27213	29658	17590	30954	19264	17248	17590	36373	43150	42932	57907
BCMA / TNFRSF17	8842	7504	8733	7689	10560	7776	7880	8702	5151	5330	5358	5373	6059	6037	6271	8011	5284	5962	7201	6595	7827	8011	6424	9036	7875	9095	10298	9036	8012	14230	7948	13501
BCMA / TNFRSF17	7927	42875	9100	7719	10836	7733	9794	8882	5510	5871	5135	5473	6457	5988	6586	6715	5521	5854	8386	7280	8456	6715	6815	7832	8198	7947	8124	7832	10071	15294	8355	14507
beta-Catenin	7037	7230	10309	7016	9320	7005	7532	8503	5534	5200	5258	5391	38460	5630	5279	7414	5587	5588	7855	6782	7788	7414	6964	11844	7591	12521	11312	11844	8195	7767	8863	8779
beta-Catenin	9825	9165	10708	9397	8033	7464	7119	8048	6710	6640	6738	7478	6463	5631	6098	6470	7583	7306	10195	8376	8504	6470	6149	13667	8029	17545	15657	13667	8075	7994	7293	8595
BLC	8504	8088	9114	7364	11520	12968	12370	14848	6588	7217	6978	7155	9326	7712	8254	10192	7187	7153	12466	9543	11047	10192	8483	6991	10249	5847	5731	6991	11297	11276	12998	15916
BLC	9144	8553	10051	8660	11731	12258	12647	14225	7281	7498	7161	7833	7901	7142	7979	11223	7219	13933	11302	9007	10188	11223	8586	7308	10102	5822	5587	7308	10718	10733	13187	16107
BTC (Betacellulin)	7321	7624	8685	8642	8586	8042	7644	9046	4999	7013	5735	5247	12644	6259	7172	10212	5792	5881	6544	5437	8290	10212	6827	4695	8454	4791	4529	4695	9833	6740	8767	9078
BTC (Betacellulin)	6974	6469	8477	7637	7599	7095	7207	9312	4975	5580	5908	5076	5272	4786	5167	12144	5366	5839	8265	6913	8163	12144	5497	4855	12183	4940	4787	4855	6810	7036	6798	8494
Cardiotrophin-1	6261	5625	6581	5500	7709	7582	7611	9083	4891	5368	5165	4901	6814	5673	5162	7466	5300	5469	9619	6867	8142	7466	6160	4581	7454	4664	4379	4581	6047	7638	6677	8395
Cardiotrophin-1	6224	5454	5882	5318	7969	8169	7251	7681	5024	5459	5292	5338	5672	5692	5936	6892	5440	5459	7192	6155	9049	6892	5963	4569	15820	4481	4418	4569	6494	6155	6806	16818
CCL1 / I-309 / TCA-3	5614	5753	6178	4998	6754	6587	6016	6991	4567	5082	4986	15619	5197	4608	5070	7352	5291	5052	9273	7144	7692	7352	4958	4485	7716	4262	4029	4485	6634	6495	6529	9138
CCL1 / I-309 / TCA-3	6571	5966	5504	4433	7793	5397	6794	7247	4403	5128	5223	4756	5807	4590	4977	6658	4933	4974	8777	6993	7507	6658	4880	4376	7177	4366	3910	4376	6569	5471	5342	6640
CCL28	6977	6051	5708	5617	9204	6980	7269	6706	4928	5052	4919	4799	5792	4647	4774	6945	5023	6482	7347	7561	7771	6945	5420	4214	7650	4254	4462	4214	8589	6072	6404	8597
CCL28	7091	5744	6806	6188	9276	6754	7519	7083	4710	5081	5047	4956	5777	5012	5089	6751	5266	4915	5669	7990	8108	6751	5620	4769	7240	4470	4477	4769	9351	5776	6619	8373
CCL4 / MIP-1 beta	6996	6119	7056	7773	9538	6782	7474	10188	4896	5229	5661	5401	6580	5480	4854	7066	5226	5544	8362	8082	8057	7066	6519	4696	8088	4694	4580	4696	7978	6191	6603	7547
CCL4 / MIP-1 beta	6641	6447	8121	7211	8894	7487	7263	10326	4701	5401	4945	4946	7906	5911	5453	6800	5598	5586	9955	8905	9486	6800	6118	4667	8459	4645	4498	4667	7478	6269	6885	8252
CCL7 / MCP-3 / MARC	7682	7908	9307	8208	8765	8179	7133	9677	5048	4881	5183	5020	6886	5189	4648	6959	5818	5492	7356	7709	8339	6959	5877	5108	8514	5561	5221	5108	8828	6695	6691	8455
CCL7 / MCP-3 / MARC	6729	6379	8201	6332	9034	7031	7654	7333	5252	5337	5600	5374	6858	5022	4905	7328	5546	5901	10787	8708	8176	7328	5812	4790	8122	4849	4373	4790	8290	6409	6647	7679
CCL8 / MCP-2	6485	6196	8347	5884	8699	7001	6778	9953	5223	5703	5873	5336	5932	6175	12617	7175	5401	5436	8049	6507	8352	7175	5745	5061	7905	6332	5075	5061	9015	6360	5611	7273
CCL8 / MCP-2	6701	6661	7672	5924	8987	6982	6871	9698	5032	5523	5595	5434	5867	7187	5447	7162	5719	5361	7753	6246	8165	7162	5752	4996	7670	6011	4729	4996	8668	6262	6022	7506
CCR10	7596	7026	8138	6104	13699	9356	8443	9750	5165	5785	5609	6913	11468	6844	5542	8567	5753	5746	6990	6054	12181	8567	5607	4710	9406	4945	4781	4710	48156	16262	14766	25026
CCR10	8513	8342	9803	7786	13189	13915	10799	13753	6686	6785	7217	9060	8668	7699	6006	8733	7340	6995	10882	8597	12290	8733	6705	6588	10822	6175	5859	6588	37070	23156	19448	50067
CCR3	7359	7683	9238	6263	13732	8814	9633	14406	51670	7155	6158	88505	6319	19638	7049	6662	5923	5319	8802	7922	8807	6662	5762	5056	7682	6042	8316	5056	16126	16619	21760	28255
CCR3	6384	7135	9312	6152	12887	9713	10913	14554	47185	7544	5780	85751	6727	4938	11723	6858	5493	5218	9119	7921	8192	6858	5584	7914	7851	12092	13634	7914	23397	24818	32151	43996
CCR4	11520	10371	12930	10271	11189	8078	7159	8194	8608	8332	8408	8503	5518	4616	4316	6909	8873	8728	11631	11311	8095	6909	4936	10448	7289	9289	8707	10448	10402	25992	9163	94327
CCR4	11276	12947	15357	13314	18876	9324	8906	10611	8644	8948	8568	8631	5193	4953	4738	8428	8395	8724	12225	10764	8635	8428	5163	10616	6786	8835	8791	10616	12801	7158	7503	11183
CCR6	12106	15455	12917	12633	29500	23823	18453	35662	9159	9986	8047	57645	7537	10751	7899	20266	15467	9383	8256	15721	12914	20266	17749	8347	30450	9745	11765	8347	78192	81336	61808	63227
CCR6	11916	30484	13473	14182	21830	19388	18183	30578	8295	7693	19767	40964	6905	12800	7141	15701	16149	8436	7817	10651	13843	15701	11441	8365	26776	11216	12072	8365	59119	184102	42318	40281
CCR7	9757	7973	8856	7495	15390	9527	10186	9368	5385	4842	5276	5388	7523	7228	8626	7310	5319	5456	9544	7189	8588	7310	7118	4755	8217	4761	4967	4755	9770	10105	9978	14522
CCR7	7847	7646	9099	7522	13401	9486	9804	10038	6062	7180	7050	6071	7123	7497	9131	7870	5838	6174	9426	7026	9163	7870	7600	5059	8559	5362	4801	5059	9997	8702	8754	10653
CCR9	10287	9690	12178	8951	12539	13736	11753	12000	7741	8446	8898	8171	8866	7833	11910	8856	7834	8183	10598	9171	10644	8856	9169	6776	13880	6285	6204	6776	11192	10658	11103	15666
CCR9	9973	9811	12659	9877	11536	12305	12277	14009	7211	6866	6776	13443	9384	7284	9786	8184	8224	8065	11592	9356	11053	8184	8644	6478	11532	6470	6178	6478	14424	10155	10762	18672
CD11b	8741	7102	9757	7322	8866	7945	8889	8726	6380	6992	7124	6776	6561	6318	8661	7163	5917	6345	9162	6943	8026	7163	8767	5586	8735	4240	4465	5586	10767	8874	9360	14450
CD11b	7332	8103	9836	7930	9400	8526	8289	9235	6027	6826	6403	79711	7254	7270	9033	7552	6010	5767	8970	7385	8878	7552	7842	5598	8550	4445	4083	5598	16274	8331	9079	13694
CD14	7279	7007	9134	8427	11222	9219	7792	10361	5972	6844	5897	7091	5083	5634	5811	9037	6040	6392	7079	6454	7954	9037	5505	5538	8755	5487	5229	5538	17218	11610	7967	11640
CD14	7413	7319	8609	8420	8659	7056	7247	9667	5686	5779	5480	5897	6124	6358	6693	12199	5527	6094	8735	6864	8260	12199	6892	5126	13378	5458	5467	5126	7450	7236	6803	8102
CRP	7007	6681	7832	6955	7738	6607	6970	7735	5187	5226	4993	5629	6625	6669	6363	7772	5404	5370	9627	6856	7597	7772	6021	4620	8092	4892	4481	4620	7166	6494	6498	7330
CRP	6771	6430	7359	5975	8190	6773	6989	8334	4830	4907	4826	5811	6433	5422	5951	6548	5089	5524	9527	6689	9203	6548	5681	4869	8105	5029	4591	4869	7378	6466	6584	7339
CD27 / TNFRSF7	5950	6013	6106	6706	7701	6432	6969	8350	5548	4949	4904	6509	5433	5113	6516	6527	5612	5525	6188	6438	7871	6527	5460	4740	7583	5042	4976	4740	8092	7221	7391	8183
CD27 / TNFRSF7	6745	6196	6788	6804	8618	7292	6828	8022	4885	5350	4954	4948	6098	5352	6415	6961	5192	5405	9674	7339	8617	6961	5290	5192	7925	5667	5052	5192	8255	8261	7311	8568
CD27 Ligand / TNFSF7	7426	6277	7746	6529	11591	9602	9034	10119	5279	5104	4750	6312	6789	5897	6559	7386	5652	5609	8708	7112	9389	7386	16142	4985	8437	5232	4933	4985	8563	7017	7178	7427
CD27 Ligand / TNFSF7	7614	6148	6491	5887	11250	9471	8650	14761	5417	5843	5378	5627	6998	6517	7898	7289	6204	6223	6595	6858	9036	7289	6374	5854	8577	5667	4777	5854	8040	7124	7192	7377
CD30	6777	6191	7409	5970	9845	15876	7034	7973	4992	4994	5071	5034	6310	5621	5589	7124	5583	5890	8057	7926	8421	7124	5804	4714	8599	5018	4843	4714	8074	7452	7054	7623
CD30	6731	6038	6412	7472	9076	7164	7059	7621	5162	5141	5355	4984	6568	5656	5363	7020	5644	5537	9505	7395	7950	7020	5951	4605	7415	5405	4780	4605	8138	6533	6691	8269
CD30 L	9012	8187	9781	10837	13888	9871	10618	14871	6385	6446	6876	7109	7129	6330	6994	7272	7062	7359	11461	10265	8357	7272	6905	6441	13292	6027	5534	6441	13218	8476	12794	25533
CD30 L	8806	8609	10330	10111	13563	9879	10366	15509	6932	6657	6776	7026	8006	5733	7710	7248	7401	7688	12289	10757	8428	7248	6000	6375	8447	5968	5639	6375	12087	9363	14573	30524
CD40	15012	17865	15442	13280	20908	17859	19418	20256	99966	24339	26463	97895	7173	8520	10449	9314	21446	21036	21059	22352	12896	9314	7540	19322	0	16208	17873	19322	22273	19526	20353	22380
CD40	20121	18937	13353	15390	19543	16597	16466	27606	104500	26684	25466	104647	8918	11363	9998	14268	24146	26579	23392	17718	15936	14268	11104	18247	15269	14841	17325	18247	22169	19121	20589	20754
CD40 Ligand / TNFSF5	6611	7227	7815	6907	19594	6928	7329	9623	4951	6019	6168	22274	7114	6116	5636	6760	5990	5586	8247	5995	9246	6760	5924	5447	8550	5968	4668	5447	11373	7449	8483	11298
CD40 Ligand / TNFSF5	7487	7493	8034	9414	9949	7247	6849	9187	5261	5953	5328	4810	6432	6358	5178	7422	5783	5590	8679	6919	8706	7422	5562	5206	8015	4782	4257	5206	9550	7310	7479	10200
Cerberus 1	6775	6356	7349	9135	9763	10887	7874	10616	4912	6359	5555	5145	6672	5165	5620	11982	5493	5419	8140	6719	20211	11982	6649	5040	15446	5524	4494	5040	10674	7202	11220	12261
Cerberus 1	7762	7568	8729	8803	9832	9593	7515	10402	4650	5660	5079	4882	5936	5933	6124	9381	5602	5520	7317	6328	13124	9381	6043	5546	10771	5729	4984	5546	9245	7045	9501	11533
Chordin-Like 2	5879	5664	5850	7648	8788	9273	8528	10811	4732	5298	5009	4715	5777	6096	5238	6236	5718	5221	6252	5801	7404	6236	5140	4882	7265	4562	4413	4882	8610	8040	8439	11526
Chordin-Like 2	7994	7418	8648	7322	9284	7327	7200	8195	4858	5087	4705	5012	5513	5050	5494	6670	5733	5276	5769	5390	7426	6670	5317	4885	7923	5052	4863	4885	9133	7040	6981	7319
Coagulation Factor III / Tissue Factor	6358	5412	6258	5917	8284	7453	7163	8672	4932	4823	4948	5042	5195	5156	6068	6249	5192	7099	8907	6134	7340	6249	5519	4746	7971	4923	4622	4746	9357	7839	20614	8267
Coagulation Factor III / Tissue Factor	7384	6571	7270	6768	8809	6466	7280	7426	5038	4907	5312	5104	5560	5056	4983	6283	5892	5765	7353	6546	7214	6283	5863	5117	7682	5038	4742	5117	9733	8229	7480	8826
Common gamma Chain / IL-2 R gamma	9199	7747	9168	8343	12079	16322	6859	8737	5143	4977	4843	10570	5839	6829	6060	7468	5239	5569	9028	7165	9243	7468	6678	5488	8454	5164	5341	5488	11399	8824	8817	9274
Common gamma Chain / IL-2 R gamma	7709	7241	8946	7522	10075	8295	7992	15220	5987	6124	6013	5742	6060	6071	6397	7222	6543	6084	8558	6515	8546	7222	6286	5076	8321	4609	4954	5076	13787	8565	8625	9569
CRG-2	10931	9392	10135	8996	16440	13204	10167	15064	8271	9106	9244	7766	9007	9498	9304	8083	6672	7036	9047	7884	9671	8083	10129	5165	131379	4952	4745	5165	12596	10775	10813	10923
CRG-2	9323	10191	10153	8865	13750	17611	11042	16293	7356	5595	8079	7201	9655	10645	10736	8867	7117	7070	8704	7629	9937	8867	10531	5418	15433	5194	4744	5418	12069	9975	11057	11888
Cripto	14182	14056	13307	13762	18201	13203	14592	18897	20448	12446	11936	56603	11079	12366	12698	10174	10631	11528	11185	9898	12690	10174	13323	5679	64258	4391	4317	5679	17670	16119	16455	27332
Cripto	13682	13336	14399	16366	14497	13447	13184	16497	28996	17728	16134	69330	12027	29618	13578	11567	9613	11899	10419	9076	17424	11567	13189	5411	37327	5170	4502	5411	20735	15946	13885	35742
Crossveinless-2	9286	9481	10227	8343	11658	10706	10712	14146	8391	8443	8585	7863	9030	8600	11757	9101	9087	7765	9199	8337	9568	9101	8498	4985	14808	4734	4301	4985	10743	10231	9372	11636
Crossveinless-2	9032	9559	9741	7925	11103	10392	9214	15377	5255	6628	7825	5223	8768	9272	9385	8602	6944	5315	10351	8540	10756	8602	8724	4504	105222	4747	4404	4504	11427	10401	9970	12623
Cryptic	7112	6425	10981	8075	7831	6740	6765	8557	5148	5135	6834	5375	6339	6257	6605	7908	5423	5845	8558	6994	10330	7908	6321	7915	8807	6318	5411	7915	7818	6920	6295	6836
Cryptic	6201	5970	6822	8432	8096	6804	7155	9380	4780	5225	5362	5319	6176	5679	6037	7753	5713	5396	8173	6640	8030	7753	5950	5743	8157	5154	4511	5743	8117	7694	7344	10029
Csk	7949	7921	9268	7617	7882	10069	8491	14611	6720	4806	4696	9996	6750	5638	23405	7594	5232	5045	9327	6880	10005	7594	6629	5360	70066	6360	4942	5360	16971	11222	8624	14607
Csk	7650	7451	9453	7669	8781	9632	9057	12389	6308	6092	5866	6545	5584	7095	7033	8365	5195	5547	9691	7027	12665	8365	5630	5435	10260	5000	4418	5435	30826	22404	9134	13595
CTACK	21915	31627	26734	14994	23846	25857	31880	40753	17110	132053	81175	101462	6503	8492	17041	14488	12267	9305	16384	9989	13094	14488	11251	20131	60526	16558	11640	20131	26446	16827	53742	70624
CTACK	24405	19622	24130	22765	33145	29234	34616	56149	21903	166173	167932	36920	7684	10415	22153	18067	13479	11780	18335	11589	15504	18067	14005	21796	36965	17843	10881	21796	42874	26039	74533	102674
CTLA-4 / CD152	6121	5945	7027	8159	9131	8230	7051	8443	5091	5106	5128	5003	6469	4964	5245	6797	5503	5886	7656	8254	7954	6797	6485	5226	7950	4882	4649	5226	9007	6175	6699	6452
CTLA-4 / CD152	6717	5966	7328	8103	9766	8046	6906	17122	5186	5209	5317	4925	6552	5477	5293	6987	5397	5367	9972	8750	7738	6987	5954	4858	7950	4882	4313	4858	8653	6744	6172	6362
CXCL14 / BRAK	9075	5420	5908	6985	9616	7714	7308	7852	5247	5371	6153	5404	6823	4999	4665	7859	5955	5919	6430	6905	8496	7859	6226	4634	8987	5221	4692	4634	7961	6981	6483	7035
CXCL14 / BRAK	6424	5884	6158	6954	8971	7913	7732	7354	5305	5164	5333	4813	7028	5577	5058	7646	5657	5657	10064	8770	8618	7646	6339	4594	8820	5082	5067	4594	6994	7301	7511	7259
CXCL16	7319	7397	9795	7719	7898	7958	8002	7624	6122	5520	5788	4879	6643	5849	5274	7097	6069	5559	6211	6362	7834	7097	5454	4774	8372	5764	4650	4774	8835	7918	7499	9087
CXCL16	7107	7244	8709	7522	8555	8073	7306	7029	5147	5874	5394	5095	6390	5730	5932	6252	5708	5578	6135	6680	8558	6252	5669	5079	7571	5505	4544	5079	12699	7737	8560	8408
CXCR2 / IL-8 RB	7308	6602	7340	6354	11057	10874	7424	9696	5972	5395	5433	5408	7655	7707	6832	8776	5702	5602	6034	7212	12053	8776	6900	6866	10122	9556	8294	6866	12057	8113	7939	8094
CXCR2 / IL-8 RB	6691	6254	7483	6347	11845	8884	7178	9351	5091	4991	4843	5267	9755	7413	6151	7709	5618	17875	9170	7318	9673	7709	6821	8363	10017	8831	10336	8363	9713	7652	31345	7796
CXCR3	7425	7582	8988	9306	12252	8520	7408	8742	5761	5911	5835	8174	7926	6443	5549	6838	6910	6283	7201	6822	8288	6838	5565	5583	7919	5638	5383	5583	15185	7893	10362	12110
CXCR3	7875	7682	7188	7898	8792	8964	8751	8222	5750	6387	6676	8698	7167	6432	6255	7513	6850	6539	7179	6752	8500	7513	5729	5592	8219	5260	5138	5592	21981	8661	11125	13986
CXCR4	7854	7266	8211	7798	11850	13017	19349	9810	17501	5357	5712	9149	5731	6254	5523	6360	6464	5496	9120	6676	8423	6360	5605	5368	8952	6865	4892	5368	47449	24657	18580	25944
CXCR4	10221	9591	10843	10240	17839	24091	29798	15149	72005	7382	7135	73141	7038	7571	9085	9236	7370	7296	11785	9951	14472	9236	5557	8401	18317	11054	7187	8401	70335	42591	28727	62477
CXCR6	11461	9516	10798	9010	22933	20562	29396	35954	218299	7949	8711	14062	7863	7445	12866	7492	6844	6674	11425	8725	18296	7492	6679	9956	71589	10295	11458	9956	52644	40308	34987	74923
CXCR6	11026	11266	11038	9757	21829	20145	36998	26367	161283	10621	8288	14160	9031	7441	33168	7435	7826	7392	11741	8954	10971	7435	7092	11369	103221	11464	12797	11369	67999	47119	39517	83103
DAN	10025	9405	11880	10384	16004	16827	13052	20762	5991	6423	6360	6772	5632	9496	6223	6659	7002	7354	12091	9059	8123	6659	6648	6317	7984	6372	6071	6317	35149	31637	20744	26049
DAN	6944	6408	8180	6808	22296	17485	12237	27214	4675	5055	5242	5190	5437	8138	5372	7082	5449	5188	10315	7063	8273	7082	7205	6093	8313	6430	6122	6093	34815	26732	19487	26042
Decorin	8659	8266	12798	9271	10419	9439	9745	11407	9270	7224	7169	10930	7250	6664	7338	8310	7568	6894	13413	9648	10232	8310	8118	6674	11123	6306	6183	6674	14135	9342	9709	13490
Decorin	9485	9274	12008	9668	10962	11020	11094	12875	9102	7031	7529	12462	7441	6857	7533	8769	7511	7006	13073	9732	10712	8769	7731	6499	10981	6458	6390	6499	13450	9328	9651	14159
DKK-1	6403	6566	7667	7391	7723	7754	7456	9263	4895	5351	5008	5335	5458	4950	5444	6714	5699	5408	9100	6750	8497	6714	5618	4926	8508	4962	4564	4926	7917	7518	6922	9495
DKK-1	5102	5399	5608	5950	6985	6659	6297	7586	4925	7890	5132	5390	5347	5000	6215	7073	5523	5483	9812	7379	8022	7073	5741	4656	11864	4774	4185	4656	8936	6986	6658	7208
Dkk-3	6556	6275	7593	7141	7852	7922	8026	9591	5397	5432	5443	6279	5751	5836	6694	7390	5584	5963	8168	7195	10293	7390	6328	5487	7830	4733	4262	5487	8522	8486	7848	9052
Dkk-3	7053	7061	8700	9436	7584	8034	7228	9677	4962	5286	5147	5160	6107	5836	6155	7210	5387	5257	10152	7391	8420	7210	6395	4879	9449	4118	4262	4879	11000	8506	7904	9469
Dkk-4	6581	6506	7054	8699	8649	7519	7057	9385	5283	5139	5622	13317	6433	6777	6366	7391	5353	5398	9918	6895	8263	7391	6723	5752	9183	4288	4194	5752	8591	8550	8678	8740
Dkk-4	7376	7726	8403	7647	8016	8295	8107	9996	4926	5195	5490	5421	7047	6721	5462	7381	5193	5036	9158	7082	8632	7381	7186	5687	8741	4883	4624	5687	12815	7784	8165	10242
DPPIV / CD26	8159	7475	9616	8262	9194	11549	11811	12174	6594	6473	7263	6508	7196	7114	9661	8271	6215	6643	8811	7139	71505	8271	9937	5408	81042	6113	5040	5408	8587	9294	8706	9297
DPPIV / CD26	8322	7433	9275	8291	17238	14113	12260	14885	10453	7770	7710	7957	7891	7910	10762	15364	6958	7789	8872	7662	14770	15364	18843	5502	22078	5369	5214	5502	9056	9638	9564	10372
DR3 / TNFRSF25	6000	5359	5645	6925	9699	6098	6344	7305	4721	4744	5048	5087	5797	5035	5060	4584	5334	5489	5228	8099	9074	4584	5407	4958	5165	6276	5520	4958	5557	6386	6250	6073
DR3 / TNFRSF25	5231	9898	5808	8249	7001	5785	6317	6390	4767	4909	5210	5225	5832	5346	6214	6486	5895	5470	5673	7870	7600	6486	5445	4867	8445	5384	4616	4867	6072	5714	13078	6765
Dtk	9075	8949	10153	12437	12269	12339	11906	13652	22905	21501	141152	53354	14808	7902	8428	10049	7682	7688	10208	10827	11828	10049	8275	8631	13306	8101	8290	8631	13167	9701	15160	21806
Dtk	9113	8460	9494	10274	12856	14150	12074	15468	21691	31078	5123693	37360	12012	9461	10906	9232	7950	7439	10355	10379	12771	9232	9122	11019	14468	10360	10734	11019	13880	10001	17944	22621
EDAR	7730	5688	6368	8047	9807	7365	7353	10513	5528	5563	6451	5519	8122	58185	4547	6881	6599	6179	8775	8188	8207	6881	6702	4625	8896	4895	4393	4625	7524	6791	7318	9332
EDAR	6344	5857	7019	8566	9697	6886	7172	10909	5249	5169	5430	5394	7042	5409	5682	7433	5922	6475	8393	7875	8514	7433	6201	4564	8602	4882	4834	4564	7422	6950	8126	9296
EGF R	11780	12187	15642	13817	14346	18271	18998	18258	6362	6911	6985	7271	6781	8024	11326	12767	10459	10833	14674	12933	19528	12767	6108	7797	15883	7965	6518	7797	24891	18271	21487	23704
EGF R	15994	16879	16861	18278	15820	19393	21136	18503	6642	6824	10372	6357	7158	14922	13385	9434	9694	9841	13131	18658	12608	9434	5543	6468	13668	8930	6151	6468	27755	21095	25243	30720
EG-VEGF / PK1	6831	7896	8527	6806	8643	7678	7462	8228	5439	6304	6038	5901	5675	5397	55020	7173	7023	6700	7285	7087	9056	7173	5747	4952	8030	5897	5247	4952	8977	9096	8831	8170
EG-VEGF / PK1	7621	7456	8197	6477	8318	9262	8070	8971	5196	6612	6519	5433	6413	9562	7869	7397	7041	6779	7602	6964	8272	7397	6535	5292	8093	5885	5192	5292	8727	8819	8726	8311
Endocan	7150	6583	7783	6580	8375	9418	8268	7021	5134	6000	5804	5139	5475	5471	5112	7131	6187	5738	7829	7569	8333	7131	5507	5570	8124	5915	5541	5570	10164	8409	8220	9416
Endocan	6622	6602	7140	5750	7970	8747	7998	7442	5632	5447	5627	5298	5820	6862	6323	6999	6113	6040	6436	6494	8499	6999	5850	4423	8003	3747	4106	4423	9527	7969	7948	11684
Endoglin / CD105	7426	7272	7998	7438	7878	10269	10097	11087	5395	5239	5762	5864	6279	5230	4523	6815	6085	6218	6841	6733	8690	6815	5733	5114	8095	4862	5099	5114	8808	7205	7178	7761
Endoglin / CD105	7784	9173	7471	7847	7762	10568	10326	11494	5228	5751	5866	5314	5321	5027	5219	6676	5194	5289	9246	6763	7895	6676	5872	5214	7843	5018	5281	5214	8658	7254	7092	8698
Endostatin	9179	8104	8913	9631	11076	11634	12204	14682	6833	8137	8156	9796	5938	6758	7230	6760	8124	8083	10734	9167	8093	6760	5704	6406	7746	6346	8128	6406	14751	13270	14105	19150
Endostatin	7665	7369	7940	7640	12452	12628	17397	13518	4828	7088	10397	9482	6600	6848	8261	7121	7315	6586	9108	6466	7822	7121	6370	6976	8159	7137	7753	6976	16973	16258	13647	23652
Eotaxin	7997	6724	7609	6521	6373	6558	6328	7009	4878	4837	4671	4980	5179	5373	5724	6147	5599	5052	6097	7069	7566	6147	5424	4732	43180	5347	5030	4732	7617	5641	5350	6258
Eotaxin	5516	5523	6099	5631	7188	6357	6590	7336	4568	4836	5026	4941	5545	4715	6132	6921	6368	5293	7441	5605	7666	6921	5938	4897	7888	5247	4802	4897	8893	6200	5931	7468
Eotaxin-2	6589	6340	6924	6526	8105	8319	7685	9451	5228	5151	5136	5535	5715	5459	5430	7020	6668	5434	8662	6704	9129	7020	6809	4970	8243	5288	4792	4970	9446	6727	6936	8258
Eotaxin-2	6493	6915	8100	7642	8308	7010	7093	9341	5060	4971	5146	5318	5467	5282	5397	6708	6164	5315	8419	6560	8003	6708	6764	4781	42123	4858	4500	4781	8236	6467	6812	8433
Epigen	6256	9306	7086	6211	8109	7361	7777	9495	5428	5479	5626	5613	5592	5173	5945	6648	5690	5760	9534	7091	8541	6648	6129	4746	7899	5489	5042	4746	9110	8078	8895	7937
Epigen	6299	6288	6916	6827	7826	7621	7127	8942	5038	5216	5059	5481	5839	5604	5860	6722	5720	5384	10311	7322	8167	6722	6089	5080	6995	4441	4367	5080	8670	7850	8151	9077
Epiregulin	7272	6683	8277	7719	7688	6856	6616	9365	5099	5340	5813	5335	6368	5255	6225	6862	5286	6613	9387	7262	11448	6862	6026	5219	7715	4910	4604	5219	10494	7012	7387	8529
Epiregulin	7352	7635	8761	8578	7618	7831	6687	10623	5105	4975	5179	5277	5643	5721	5608	7380	5169	5444	9853	7060	8451	7380	6342	5134	18263	4798	4381	5134	8794	7480	7206	10339
Erythropoietin (EPO)	6922	6061	6411	8457	7666	6436	8062	12477	5220	4832	5504	5279	5345	4804	4734	6960	5455	5767	8519	6366	8548	6960	6517	5140	7820	4579	4119	5140	9405	7330	6555	7232
Erythropoietin (EPO)	6606	6263	6811	7825	7131	12631	7583	11383	5013	5535	5453	5239	5498	5150	5939	7119	5408	5148	8416	6419	8351	7119	5948	5159	8105	5037	4314	5159	10573	7341	6576	8016
E-Selectin	6921	6377	7792	8442	7959	6754	7327	9221	5235	5223	5047	5288	5286	5124	4654	6867	5815	5588	7820	6586	7811	6867	5437	4456	8477	4410	4273	4456	8125	7534	7289	7137
E-Selectin	6668	6381	7680	7354	8284	7925	7278	9712	5375	5397	5364	5409	5497	5467	5629	7093	5440	5384	9445	7290	8074	7093	5753	4897	8500	4667	4360	4897	8205	7384	8019	9354
FADD	7530	6804	8878	8036	8566	8109	8673	11213	5599	5452	7367	5309	6481	7276	7676	7610	5372	5503	10084	8319	7936	7610	6398	8312	8410	6512	4697	8312	10201	9427	8930	9802
FADD	7519	7029	8053	8992	12950	8838	7968	10175	6244	5868	6242	6214	7210	7446	7222	7674	5839	5630	9956	9083	8240	7674	6850	5767	9358	5135	4639	5767	13801	8232	8818	9649
FAM3B	7699	7413	10061	12254	11488	7694	7991	8857	5148	5688	5213	5166	6324	5448	5343	7485	5887	5752	8959	8156	8554	7485	5773	5317	8562	5134	4600	5317	8050	8180	8191	8180
FAM3B	8270	7469	9408	8983	11570	9446	8226	9092	5004	4901	5505	5203	5979	5493	5069	7167	5939	5852	10225	8370	8253	7167	6273	5166	8540	4395	5104	5166	8507	9178	8354	8346
Fas / TNFRSF6	5093797	3841134	5791313	15896	6227790	4904437	7382102	6030818	8354760	3064099	2522322	8720087	3965430	3826608	4018160	2899430	6616067	6883269	7135350	8020204	3316428	2899430	4388418	4500074	2877492	4580670	3872962	4500074	6572928	6693366	6054120	6870696
Fas / TNFRSF6	6643955	4422891	5355669	15389	7129605	5874569	6300743	6041327	8001060	2870153	2807843	8361817	4906130	3955790	4673090	4144824	6938103	7172351	7934175	8457461	3752917	4144824	4023938	4495171	3147098	5659428	5433748	4495171	6930034	6491425	5862208	5914985
Fas Ligand	8656	8091	9230	7983	8774	8993	8578	8442	6526	6523	6917	6529	6731	7268	6668	9012	7076	40116	9807	8137	10881	9012	7121	6199	10476	6316	5784	6199	8373	7410	7642	8203
Fas Ligand	6438	5926	7038	6655	7240	6431	6810	6102	5179	4825	5255	5144	7227	6882	7061	9439	5603	5026	5870	7079	10561	9439	7315	4990	10575	4078	4334	4990	27507	6853	6911	8136
FCrRIIB / CD32b	9870	10544	10952	9803	12277	14810	14068	15448	7269	11807	9069	7474	11985	8223	47970	10050	7906	7920	11905	8907	10907	10050	11037	7214	10835	6779	6286	7214	13144	12446	16799	11822
FCrRIIB / CD32b	9979	13638	10888	10703	14347	14789	15352	15412	7291	9391	7941	7259	12269	9801	116607	11922	7757	8050	12121	8622	19018	11922	11042	7767	18339	7083	6932	7767	13972	11973	15137	11864
FGF R3	9775	12107	10988	9790	10632	12116	12194	12804	6977	7332	7056	6774	19802	9959	9015	12378	7441	7125	12790	9154	15826	12378	11035	7052	41492	7843	10762	7052	15823	12538	12747	14219
FGF R3	13449	13405	16080	14132	13417	12515	11571	13251	8896	9350	9366	8858	20309	10021	10356	11811	9667	9440	17181	12024	14444	11811	17128	8999	14388	7900	14272	8999	22550	14719	29746	18289
FGF R4	6482	6066	6819	6249	7211	6487	7281	6728	5037	5909	5403	5254	5693	5510	6218	6467	6493	5779	7570	7156	7477	6467	6014	4987	6869	5337	5662	4987	7846	11613	7313	7490
FGF R4	7820	6827	7863	8151	7037	10426	9503	7452	5490	5612	5571	5721	6459	6010	5964	6451	6543	6033	6610	6179	7058	6451	5847	4827	7634	4573	4751	4827	7568	7395	7785	10078
FGF R5 beta	10042	9513	9005	9673	8438	9653	9275	10630	6200	6946	8593	6007	8066	11217	10378	9563	6950	7459	8603	7436	9579	9563	9630	6815	13759	7658	8865	6815	9955	8024	7819	11630
FGF R5 beta	9091	9077	8224	8059	8246	8841	8682	8997	5907	7719	7176	5896	8308	8937	9465	8474	6763	6930	8725	7376	11890	8474	9597	6762	11222	7783	8338	6762	10782	8270	10362	9558
FGF-21	7684	6304	7110	6852	7144	6789	7523	7980	4857	5169	4928	4874	5715	6192	5603	7608	5400	5052	8562	6707	8243	7608	6055	4528	7846	4991	4811	4528	7197	6168	6090	7686
FGF-21	7046	6354	7780	6757	7938	7335	8631	6624	4863	5049	5111	5118	5852	5153	6947	6493	5795	5380	9282	7160	8197	6493	5953	4820	7774	5890	4569	4820	7814	7044	7048	8208
Fit-3 Ligand	5614	5448	6067	5369	7532	7680	6796	7169	4987	5231	5080	5207	5354	4649	5510	6667	7416	5136	7633	5762	9854	6667	5802	4758	8151	4750	4515	4758	7579	6190	5677	8847
Fit-3 Ligand	5910	5836	6882	6070	7194	6907	6437	7546	4728	5036	5330	5363	5713	4520	5496	6773	5663	5225	6465	15336	8118	6773	6162	4439	7408	4643	4506	4439	6967	6353	6616	8252
FLRG (Follistatin)	7459	6851	8051	8330	8560	9885	11402	11110	5860	5583	5377	8194	6173	5594	5190	6838	5713	5952	9832	6959	8896	6838	7050	5689	8054	5744	5438	5689	33975	20831	9508	22900
FLRG (Follistatin)	8986	9128	12806	10521	11450	15867	16484	16984	9168	6641	6502	14580	6943	5535	6465	6926	8070	7697	11198	9959	10297	6926	6464	7213	8221	7360	7371	7213	51192	19988	14968	49741
Follistatin-like 1	5806	6144	7721	6361	7065	7933	11560	9774	5022	8622	5454	7472	5430	5433	6522	6579	5831	5712	6148	6315	8192	6579	6170	5141	8418	4895	4728	5141	9427	7713	7417	10642
Follistatin-like 1	7101	6014	7365	8739	7656	8081	7779	11423	4965	5142	5455	5158	5689	5686	6793	7073	5488	5293	8631	6790	8502	7073	7189	4995	8573	4991	4787	4995	12680	7486	6776	10436
Fractalkine	8579	8917	11851	10855	9819	11345	10227	15682	6411	6467	6608	8438	7319	6624	8146	8570	6795	7255	11061	8672	10103	8570	7767	6423	10436	6454	5667	6423	12226	8407	8944	18306
Fractalkine	9741	8037	10819	8848	9224	13963	16850	16640	6633	6806	7337	10984	7024	6312	13564	8901	6962	6438	12814	9358	11716	8901	7133	6901	10092	6635	5584	6901	11286	11613	9878	19965
Frizzled-1	11038	10538	14577	15349	11285	32802	32738	20655	7986	8957	8939	8752	9559	7619	16361	14045	15337	8846	13301	12886	21171	14045	9792	13869	16058	14201	15509	13869	44748	26153	18343	53679
Frizzled-1	13146	10716	13972	14327	12030	22996	21098	16549	8305	8409	8957	8398	8466	8375	14626	12611	18325	9495	13691	13560	21373	12611	8662	15816	18734	16134	15016	15816	43673	25153	17727	51166
Frizzled-6	7330	6289	8195	9592	12246	7614	7627	8660	5092	6197	6991	4970	6064	5962	6917	6948	6198	5775	8171	7601	7472	6948	6162	5352	7942	5221	4466	5352	9099	7639	7501	9007
Frizzled-6	6765	6785	8131	10005	9589	7102	7733	8672	5011	5255	5137	4817	6412	5557	6032	7258	6473	6599	6677	9000	7490	7258	5971	5498	7598	5576	4772	5498	10070	7519	8389	9599
Frizzled-7	7713	5899	7517	9124	8156	7966	7872	9286	5187	5214	4963	5152	6444	5289	5303	6960	6027	5889	6693	9257	7880	6960	5692	5168	7767	4585	4298	5168	8849	7146	7254	8664
Frizzled-7	8210	7231	10070	9573	7654	7685	7174	9043	5083	5096	5763	5268	6779	5262	6413	7063	6146	5666	9399	8406	8062	7063	5727	4817	8374	5110	4800	4817	8113	6996	7141	8005
Galectin-3	7871	7243	9611	8790	8160	7156	7354	11597	5220	5142	6015	5172	7223	5857	7429	6823	5921	5636	10244	8358	8382	6823	6825	4773	9561	4827	4272	4773	7784	6176	8029	10233
Galectin-3	7467	7529	10076	8542	9123	7374	7940	14375	5548	6052	5827	5588	8601	5695	5880	7119	5747	5926	9441	9012	8385	7119	6746	5408	10571	4507	4354	5408	7682	6897	7695	11130
G-CSF	7593	6442	6982	8770	7302	7236	7690	7525	5082	5013	5457	5256	6289	5361	21719	6715	5769	5467	6388	57143	8226	6715	6070	4669	7131	5050	4512	4669	8516	6430	6645	7250
G-CSF	6633	7329	5755	6305	7770	7445	7128	7069	4978	5457	6697	5277	6054	5921	4902	6679	5624	5390	6404	5770	7753	6679	5634	4778	7473	4670	4244	4778	9297	22233	6751	7172
GDF-1	13590	12395	13940	12743	14110	12928	13032	13291	8790	11408	6306	8798	11397	10004	10474	10718	11571	11306	12952	10687	12437	10718	10326	12612	11791	14429	12852	12612	15766	13099	12799	15346
GDF-1	12744	12190	13421	11996	13717	12943	13393	13218	10641	10535	10492	9823	11453	15342	13443	9217	11650	11484	12685	10923	11763	9217	10492	14764	10826	17291	15536	14764	20251	13543	13848	16457
GDF-3	6808	6996	7644	7515	8379	8844	8699	10282	5104	5568	5629	5308	6964	6100	8894	7250	6501	6308	6536	7025	8867	7250	5723	5585	7650	5026	5138	5585	9666	7533	8603	9907
GDF-3	7759	7055	7983	9806	7721	8774	8758	10102	4983	5445	5210	5199	7148	6801	6888	6903	6054	6056	7879	6389	7970	6903	6034	6117	7929	4763	5806	6117	10060	7498	7739	9872
GDF-5	7964	10007	8700	8121	7604	17968	18144	18717	4897	5389	5153	8032	8178	7267	9121	9358	6095	6410	8464	6950	13049	9358	7727	5313	11903	4849	5472	5313	21217	15358	17116	24464
GDF-5	8287	7173	6868	7249	8875	14452	17646	17244	5630	4704	4768	7525	7078	6242	7043	8131	6466	6122	7628	6386	13769	8131	6652	5071	10374	5051	7235	5071	23399	13871	11374	18506
GDF-8	9711	8591	10401	9434	10270	10847	11590	11654	6358	6552	6712	6655	6320	5878	6301	6681	8436	7969	9720	8469	9188	6681	6154	6341	7655	6347	7107	6341	23957	11371	10520	101920
GDF-8	10827	8995	11063	10751	12897	11386	12236	12984	6457	7170	6367	6188	6631	6208	6873	6889	9210	8906	8902	8631	8430	6889	6193	6683	7801	6949	6701	6683	19162	11993	11740	39447
GDF-9	7610	6078	6677	5624	6554	6846	6542	8417	5014	4911	5133	5125	5311	4883	11415	6610	5699	5515	6167	6641	7503	6610	5888	4658	8420	4948	4652	4658	8325	6075	6086	8145
GDF-9	6297	5584	5570	5551	6637	6163	6005	6697	5050	5223	4767	5078	5330	4637	5097	7036	6091	5461	9100	6615	8164	7036	5790	5112	7748	5316	4816	5112	6519	6121	7590	6418
GFR alpha-2 / GDNF R alpha-2	6458	6007	6878	6600	6996	6855	6527	7443	5232	4869	4888	5224	5951	4938	5992	6775	6520	5725	8919	6803	8486	6775	6399	4867	8587	5547	4862	4867	8434	6512	6285	7331
GFR alpha-2 / GDNF R alpha-2	6870	5879	6376	6801	7628	7526	7469	8946	5115	5275	5069	5171	5645	5307	6786	6668	5465	5211	10158	7297	8651	6668	6704	4790	9029	6048	4482	4790	9913	6877	6548	9565
GFR alpha-3 / GDNF R alpha-3	6010	5282	6534	5477	6429	7943	6525	8077	4878	5104	5155	5085	5207	4735	4998	6639	5393	5468	10139	7301	7409	6639	6593	4533	7531	4692	4256	4533	7525	6060	5860	6958
GFR alpha-3 / GDNF R alpha-3	5817	5436	6206	4883	6515	7061	6421	9881	4893	5118	6108	5384	5420	5081	4658	7331	5622	5309	7772	6400	8093	7331	7127	4604	8304	4638	4099	4604	7309	6332	5962	7381
GFR alpha-4 / GDNF R alpha-4	7768	8180	9946	8298	9229	10217	8997	11440	7226	8038	7638	5579	7415	7442	7644	7052	7720	7951	8251	9160	9074	7052	7343	6300	8712	6457	6658	6300	12075	10203	9901	10616
GFR alpha-4 / GDNF R alpha-4	7906	7703	10066	8882	9466	10865	7148	12856	6719	7503	8422	6974	7299	8165	7516	8755	7240	7739	10099	7994	8804	8755	7734	6642	8518	6289	6080	6642	12818	9382	9165	11378
GITR	6450	5371	6361	5374	6885	7268	5062	10215	4930	4836	5256	5039	5607	5132	5849	7000	5447	5461	9156	7459	8178	7000	6070	6501	7885	8099	8135	6501	7382	5876	6091	6980
GITR	6107	5461	7461	5457	6886	6016	6388	7429	4876	4658	5019	5002	5448	4809	4972	6714	5123	5033	9481	7886	8315	6714	5824	6364	7372	7627	7215	6364	7253	5577	5828	7314
GITR Ligand / TNFSF18	6804	5708	6544	5870	6894	6540	6054	7804	4663	5013	5795	5180	5459	5750	4746	7088	5568	5335	7883	7538	7961	7088	5568	5515	6912	4895	4509	5515	9115	7746	6841	9681
GITR Ligand / TNFSF18	7578	6864	11296	6369	7211	6505	6401	7751	5197	4948	5209	4911	5898	11262	5535	7284	5836	5512	7330	8734	7904	7284	6020	5546	7508	5252	4891	5546	8671	7720	7537	9629
Glut2	7749	6937	8173	6620	6796	7986	7795	8836	5048	4825	5977	4895	5794	5624	6100	6727	5887	6279	8123	8945	8354	6727	6109	5295	7508	4998	4373	5295	8745	7126	7099	10571
Glut2	6807	6204	7830	5846	7807	7691	8714	12163	4877	4977	5211	4959	5960	5828	5496	7274	5511	5709	6650	9122	8286	7274	6053	5012	7711	5231	4625	5012	8401	7730	7176	8978
GM-CSF	6590	6115	8652	8606	7516	7582	7893	9564	5103	5132	5478	5115	6115	4976	5332	7175	5628	5558	10227	8705	8056	7175	5613	5350	8038	5092	4351	5350	7960	7396	7012	7425
GM-CSF	7859	6816	17560	7193	7508	7294	7486	7627	5112	4927	5061	4956	6627	4888	5620	7034	5675	5703	10267	9200	8171	7034	6070	5258	8028	4783	4255	5258	7513	7033	6473	8017
Granzyme B	8942	8762	11766	8358	9530	9289	8824	9980	11429	548588	769309	13007	8241	6297	6903	9510	7205	6966	10006	10366	10500	9510	6871	6107	9595	6218	5427	6107	10383	7830	9676	13716
Granzyme B	9146	9191	10147	8848	10900	10704	9570	11769	20401	91256	264635	25396	8855	6133	6931	8809	7164	7090	10489	10777	10171	8809	7363	6830	10370	5220	5602	6830	10155	8862	10122	15766
Granzyme D	7609	6968	10396	6293	8061	6886	7159	7594	5573	5931	6691	5792	6068	6614	30633	7026	6165	5393	9368	6792	8105	7026	5682	5199	7625	6351	5235	5199	8418	7451	9395	9550
Granzyme D	7986	9618	8615	7329	7545	6905	9260	7314	5167	6354	6571	5501	6333	6546	7300	6888	6113	5923	6180	6926	8618	6888	6137	5312	7605	4838	4636	5312	7961	6958	8275	9658
Granzyme G	9662	11671	9742	9822	11692	11913	11573	12605	7423	7441	7914	8404	9514	10287	14070	9087	7620	7241	12305	9481	11405	9087	9831	7091	11609	5933	5403	7091	14016	11692	10929	16269
Granzyme G	10177	9548	10557	9858	11318	13463	13730	13489	7469	8984	8667	7980	9692	16074	9523	9407	7612	7492	11949	9552	11523	9407	10660	7068	12045	5738	5529	7068	9992	12311	16166	18290
Gremlin	7275	7534	7274	6686	8084	6721	7070	8336	5127	5157	5438	5217	6039	5689	5419	6404	6045	5814	6442	5953	8462	6404	7412	5039	8377	5568	4847	5039	8502	7660	7280	11244
Gremlin	7234	6523	7371	6948	7346	6361	6609	7027	4902	5055	5209	4773	5920	6369	6274	6284	5532	5713	6189	6423	7491	6284	6083	4658	7499	6010	4901	4658	7344	6606	6095	7340
Growth Hormone R	5722	5587	6545	5547	6845	6224	6584	6320	4920	5042	5015	4821	5414	5499	4662	6096	5749	5332	5402	8754	7507	6096	4872	7406	7193	8154	7476	7406	7358	6227	6004	6573
Growth Hormone R	5948	5192	5802	5786	6527	6794	7102	7211	4596	4905	4998	5066	4980	4782	4618	6258	5323	5249	6122	6816	7605	6258	5447	8143	7721	7612	7219	8143	6409	6632	5651	7313
HGF R	7083	6630	6876	7820	6920	8366	8210	8074	4794	6936	5554	5032	6090	5530	5818	6665	5619	5283	7464	5986	8145	6665	5607	4782	7611	4854	4658	4782	7964	5847	6561	7564
HGF R	7021	5963	5392	5858	6887	7714	9064	8822	4796	5370	6900	5085	6403	5796	5527	7002	5036	5614	5206	6404	8333	7002	5976	4866	7801	4953	4905	4866	6477	6206	5600	6127
HGF	7476	5677	5838	9114	6676	7020	6677	7577	4835	5107	5454	4620	5562	4872	5698	6217	5511	5393	6336	6104	7369	6217	5925	4947	7982	4826	4773	4947	7942	5842	5804	7329
HGF	6971	6527	6860	6927	6589	6338	7063	7522	4890	5191	4813	5078	5614	4989	5341	6598	5799	5545	9948	6597	7683	6598	5609	4813	7378	4534	4557	4813	22456	6041	5894	6598
HVEM / TNFRSF14	8212	7622	9498	8217	7298	6822	6981	7917	5137	5270	5102	4996	6305	5063	6220	10312	6083	6004	5836	5704	7864	10312	5984	4866	8161	5202	4864	4866	9293	6894	6396	7312
HVEM / TNFRSF14	6275	5989	6738	6217	7736	8023	7755	9913	5039	5250	4942	5629	6677	5602	6422	6509	5765	6023	6726	6099	7929	6509	7101	4809	7726	5484	4765	4809	8195	7094	6617	8032
ICAM-1	7160	6356	8657	7108	7549	8835	7768	9377	5404	5437	5479	5509	6648	5061	6229	6543	5769	5456	9689	7937	8168	6543	6644	5270	8226	4926	4935	5270	9336	7925	6793	8990
ICAM-1	6750	6997	8955	7358	7698	7934	7100	9089	5392	5430	6376	5760	6562	5738	39072	6379	5543	5395	10097	7389	8923	6379	6573	4721	8247	5378	4601	4721	9457	7079	6593	8898
ICAM-2 / CD102	6880	6335	8927	6529	7331	7207	6976	8332	5148	5705	7496	5738	5800	5427	6273	7024	5918	6042	6839	6996	8038	7024	6340	4804	7939	5141	4571	4804	11477	7331	8369	10217
ICAM-2 / CD102	6222	5672	7846	7291	8175	7174	6654	9520	4916	5244	6345	5324	5990	5463	5797	7284	5408	5156	9378	7646	8121	7284	6004	4991	7838	4328	4250	4991	11870	7496	7339	10000
ICAM-5	6742	7529	8362	7039	12521	7473	6042	8595	5036	5693	5493	5554	6473	7068	5988	6884	5429	5648	8386	9070	7925	6884	5877	4764	7146	5316	4367	4764	8863	8051	9328	11002
ICAM-5	7423	6471	7845	6402	7312	7250	7454	8046	5506	5566	5476	5447	5805	6066	7342	7117	5835	5790	7487	6981	8771	7117	6162	5138	9587	5154	4821	5138	10161	8203	9722	10627
ICK	7330	7032	7669	7153	8904	10024	8771	11619	4831	5173	5445	5154	4979	4724	4180	7153	7780	5945	8170	8239	8351	7153	5729	7050	7810	7781	7570	7050	12047	7029	7745	9426
ICK	4726	4081	4265	5426	6120	5440	5094	5701	3419	3753	3907	3638	3897	3756	4944	5017	4635	4398	5688	5743	6407	5017	4136	4823	5363	5184	4961	4823	7136	4960	4837	6173
IFN-alpha / beta R1	6363	5603	6668	5455	6507	10125	6549	7568	4751	4977	4979	4949	6018	4762	4739	6729	5276	5535	8641	8168	8007	6729	5646	5331	6948	5940	5329	5331	8232	6600	5396	7288
IFN-alpha / beta R1	6491	5982	7072	5663	7833	7343	6774	7358	4703	5079	5248	4841	5279	4965	5114	6615	5330	5398	9114	7664	7924	6615	5984	5331	7322	5227	4887	5331	9305	6550	6623	9146
IFN-alpha / beta R2	7191	6706	7524	8497	18081	15622	11975	16985	7575	14634	12055	16779	6081	5505	6851	7411	6507	6139	8383	8481	9108	7411	5951	5935	8858	5844	4920	5935	26583	11669	15041	25390
IFN-alpha / beta R2	10300	9349	12389	11441	31210	21878	13842	16139	10835	20705	14066	16528	7122	6105	6520	12896	7238	8017	11271	11352	17355	12896	5453	7599	16778	7692	6683	7599	18716	11018	24897	35899
IFN-beta	6737	6512	9024	8784	8709	8627	7661	7295	5522	5763	5017	5033	6404	5490	5534	7341	5752	5353	9778	9143	8107	7341	5901	5512	8528	6315	5191	5512	9581	7932	8973	10509
IFN-beta	7751	7012	7341	8844	8940	6524	7140	7918	5362	5668	5508	5141	6705	5795	5713	6954	5686	5607	9604	9549	7692	6954	5747	5508	7839	5452	5014	5508	9255	8189	8005	8726
IFN-gamma	9948	16899	12483	9153	11511	10769	10893	11572	6785	9734	9855	6502	8423	9115	14903	8864	7428	6752	13353	8979	9385	8864	7018	7608	8069	9538	9304	7608	15748	12603	12125	13384
IFN-gamma	10652	16150	11868	11239	11748	11525	11811	11010	6767	10449	10353	6475	8187	8756	10365	8644	7393	6656	13869	9347	10160	8644	10070	7419	8751	9133	9307	7419	15070	48504	11857	14715
IFN-gamma R1	9223	9318	8727	8105	9619	9953	9071	10684	9865	10832	9428	18518	9153	11143	22158	8562	7216	7202	8261	8772	14762	8562	10350	6489	10752	6679	5970	6489	12550	8659	13705	13456
IFN-gamma R1	6051	7179	6338	5973	6937	6652	7388	7239	9551	9213	6604	14850	9241	11077	9337	8268	5982	5597	6629	6133	15064	8268	9964	4781	9755	5249	4533	4781	9229	7229	6255	9558
IGFBP-1	11218	9624	10084	8743	11795	13641	17799	15164	29088	9047	8759	25123	9103	8205	7801	8609	7320	7000	9401	8929	11257	8609	8355	6604	9950	6569	5957	6604	119398	12420	54192	18576
IGFBP-1	12737	11821	14461	12464	17721	18002	20317	18872	24342	11385	10595	28991	8064	12108	6754	8287	10621	10047	13198	11459	10135	8287	8126	9038	10507	9897	8634	9038	23206	56573	78873	261752
IGFBP-2	8566	8614	10539	7915	9742	9704	9139	9675	6228	6421	6027	6354	5562	5588	4344	6196	8085	6537	12687	8561	7827	6196	5756	6259	8625	5764	5757	6259	23329	8910	20244	21926
IGFBP-2	6774	6338	7856	5734	7918	7015	6365	7298	4791	5515	4742	4797	4963	4866	4213	6570	5339	4979	9669	6875	7984	6570	5817	5002	7637	4412	4616	5002	24217	6158	7424	26321
IGFBP-3	7123	6010	7420	6093	6636	7353	7632	7485	8880	5576	5835	8817	6235	6575	5854	6633	5018	5568	7558	6574	8129	6633	5705	5118	6595	5310	4589	5118	7135	32360	6581	7888
IGFBP-3	7124	6818	6767	6681	6937	7035	7223	6780	10487	7200	7692	9940	6405	6204	5631	6306	5777	5993	6240	5699	7645	6306	5980	5612	7163	5971	5020	5612	7859	35739	8338	9119
IGFBP-5	6748	6004	6214	5732	6338	6952	6781	6308	4632	5254	5565	4967	5464	4864	5622	6303	5323	4999	7867	6521	7589	6303	5923	5897	6570	6508	6002	5897	6772	6539	5840	7314
IGFBP-5	6813	6233	7061	6132	6425	6789	6968	6747	5095	5118	5467	5144	5739	4800	5393	7063	5479	5235	8301	6577	7782	7063	6354	6314	7270	6986	5931	6314	6971	6179	6072	7334
IGFBP-6	7872	7067	9526	7994	8173	7744	8331	8112	5813	6273	6444	6306	6398	5971	5877	7042	5889	6338	7712	5983	7993	7042	6349	5167	8242	5650	5185	5167	8314	8419	7287	8160
IGFBP-6	8024	7303	8232	7814	8206	10467	8862	10729	5925	6502	6609	5829	6526	6166	6614	6942	5881	6261	7522	6649	8064	6942	7018	5207	8609	5392	5003	5207	8130	7707	7445	8595
IGFBP-rp1 / IGFBP-7	6068	6431	7684	6416	6832	6180	5985	7268	4982	5103	5352	5067	5878	5133	5659	6668	5739	5571	7684	7150	8171	6668	6246	4811	7629	5008	4350	4811	7373	5927	5534	6285
IGFBP-rp1 / IGFBP-7	10022	6532	11703	7768	6668	6016	5796	6849	5046	5061	5086	5380	5464	4922	5295	6340	5101	5308	9669	7523	7687	6340	6666	4735	8199	4867	4113	4735	6856	5757	7811	6052
IGF-I	9031	8354	12547	9771	15876	16904	32453	19296	6677	6898	7110	7397	6347	5392	5763	6873	8010	9078	9362	8943	11828	6873	6395	6927	8044	6512	5996	6927	34513	16832	16064	31472
IGF-I	7741	8979	10392	10231	14703	22744	28960	20804	6505	7024	7817	6623	6960	4944	6518	6446	8202	7777	9206	9841	10333	6446	6498	7553	8410	7017	9736	7553	48316	24977	21984	45657
IGF-II	10141	20948	11427	11355	64659	47887	129353	30587	15890	9404	24624	54370	24679	37301	78625	14914	11219	9503	9825	25152	170318	14914	25191	20820	96062	11818	7539	20820	220631	115425	71012	177342
IGF-II	12866	20589	12203	11219	59255	47474	100919	31819	14297	8295	23397	35380	28596	42416	64562	15670	10635	7223	10052	28853	170966	15670	23924	25952	101223	12192	9367	25952	208548	100437	57886	194686
IL-1 alpha	7127	6934	9074	8408	8013	10530	9426	11637	157276	213174	244108	299858	6035	5393	27587	7729	6717	6036	7816	7122	11169	7729	6096	4766	8957	4877	4310	4766	12558	7311	8057	12829
IL-1 alpha	6582	6102	7931	8530	8182	10211	16560	14132	485187	158081	206575	495736	5926	5633	6032	7355	6541	5853	8015	7338	11119	7355	6207	5877	10473	7249	5694	5877	15592	7800	7612	16568
IL-1 beta	6146	5369	6339	7273	8031	7279	6365	7471	4903	4898	5227	5055	5585	5364	5159	6860	5383	5301	9526	7902	7797	6860	5208	8780	7208	4796	4449	8780	7510	6077	5779	6866
IL-1 beta	5668	5885	6041	6589	7164	6965	6885	6900	4930	5003	5061	5314	6005	5191	5791	6936	5426	5212	9946	8883	7891	6936	5500	4965	7639	4960	4602	4965	7957	6142	5489	7047
IL-1 R4 / ST2	4313	4046	4339	3935	5133	5071	4867	5393	3498	3554	4256	4997	3747	3093	2999	4807	4010	4146	5488	5341	5595	4807	4015	3762	5640	3402	3220	3762	5648	4698	4620	5251
IL-1 R4 / ST2	6763	6691	9078	6058	8974	7100	6788	7338	5017	5012	6527	9312	6155	5708	5678	7111	5679	5436	9725	9312	8776	7111	6466	4699	8195	5005	5796	4699	9483	7179	7017	8705
IL-1 R6 / IL-1 R rp2	8104	7449	10570	8094	11691	10137	8802	9859	5466	6846	7165	5724	6890	6848	6414	7535	5983	5935	9976	9031	9246	7535	6260	6554	8363	6814	5789	6554	11751	7553	8732	10443
IL-1 R6 / IL-1 R rp2	8600	7315	10465	9029	11298	8776	8466	9638	6033	7210	7387	5948	8383	5748	6229	8256	6364	6094	10220	9545	8840	8256	6729	6063	9145	6404	5828	6063	9839	8421	8732	10662
IL-1 R9	6682	6877	7699	8059	7390	7536	7006	6674	5073	5656	6294	5154	5786	6123	5435	6578	5878	5625	7508	6049	8071	6578	5635	5219	7649	4249	3864	5219	9831	7823	8149	9592
IL-1 R9	6512	10018	7688	6892	7391	8184	7748	8718	7943	5330	5686	5108	5709	5682	5029	6730	5850	5419	7882	7223	8836	6730	6087	5208	8301	5561	5320	5208	12233	7781	9487	9904
IL-1 RI	7508	11710	7582	6969	8089	8711	8173	7646	5393	5474	5826	6318	6605	7000	7234	7240	5644	5748	9739	6810	8813	7240	6342	5940	8605	6802	5908	5940	10917	7647	8329	18101
IL-1 RI	8160	7847	8802	8161	7829	7260	7145	8346	5640	6113	5997	5856	7307	5918	6295	7106	5580	5573	9193	6873	9310	7106	9152	5984	8333	6711	5308	5984	10250	7910	9195	10078
IL-1 RII	7035	6801	7997	7510	7949	8304	8449	9566	5021	4969	4812	4836	7045	6616	11937	6700	5536	5282	10559	7116	9392	6700	6927	5240	8733	5374	4500	5240	12739	7040	7358	10262
IL-1 RII	8487	6899	8545	8613	9771	6727	7569	7439	5160	5213	4950	5083	5056	8242	7185	7128	5374	5224	9772	6446	7522	7128	5972	4944	7721	4018	4035	4944	10563	7183	7068	9477
IL-2	6610	5789	7072	5980	6932	6821	6702	6645	4915	4783	4747	4872	5091	4978	4884	6418	5362	5749	5428	5219	7150	6418	5916	4552	7711	4698	4775	4552	7672	6755	6468	9177
IL-2	6368	5709	7124	7189	6695	6326	6301	5970	4816	4904	4683	5090	4648	4937	5012	5764	5254	5288	8145	5799	6833	5764	5799	4420	6972	5260	4395	4420	7341	5589	6334	8552
IL-2 R alpha	7052	5732	7423	7209	6358	6667	7036	6690	4959	4764	4687	4653	5295	5105	4777	5920	5473	5278	5732	5277	7119	5920	5087	4691	6399	4251	4694	4691	10196	6615	6730	8362
IL-2 R alpha	5678	5218	5312	5454	6570	7079	6192	6670	4804	4894	4750	4891	5004	5327	4391	6277	5208	4874	9480	6486	6745	6277	5413	4671	6864	4919	4727	4671	7079	6913	6884	8988
IL-2 R beta	8109	7099	8730	7227	7827	7273	7049	8083	5243	5605	5747	5518	6173	6581	5625	7293	5840	5599	8011	6457	7995	7293	5796	5017	7683	4831	4807	5017	9061	9324	115146	11155
IL-2 R beta	8172	7456	9396	8259	9681	8673	7358	7577	5028	5069	4901	5067	6317	6234	6846	7491	5536	5202	9069	7432	9050	7491	6095	5013	8274	5813	4518	5013	12953	12398	16757	10188
IL-3	8026	7386	9066	7543	7884	9376	10145	8213	6208	7167	7228	6139	6949	6479	6953	7074	6563	6422	7605	7517	8607	7074	6364	6057	7899	5480	6274	6057	11811	9452	8620	11401
IL-3	7916	7639	9247	7668	8183	8527	7427	9592	6414	7642	7762	6223	7406	6908	8323	7429	6714	6702	8044	7456	10973	7429	7223	6236	8470	6195	6247	6236	12259	9652	10447	11202
IL-3 R alpha	6703	6452	7169	6375	8375	7799	7442	8875	5211	5375	5700	5634	6292	5363	6260	7153	5742	5746	9063	7558	8461	7153	6364	6330	7774	7400	6015	6330	8335	6974	6623	7882
IL-3 R alpha	6849	7167	8435	7250	10395	7373	7660	9201	5053	5213	6087	5405	5824	5582	5151	6766	5552	5585	8801	7533	8481	6766	6145	6326	8020	7585	6229	6326	9030	6719	6507	7621
IL-3 R beta	10529	10032	13337	10235	19785	17372	13710	18226	88731	141489	41300	182242	8460	8768	9071	9166	8738	8382	10132	9797	21195	9166	12055	7954	11747	6847	6780	7954	25821	10968	9950	17031
IL-3 R beta	9895	9452	13939	10349	15419	20819	17759	19285	96948	104832	92985	243043	9327	8494	8517	9429	9783	9034	10249	9659	32568	9429	8490	10615	12810	9536	9076	10615	37481	15192	12439	25108
IL-4	7409	6257	7843	5772	6793	6707	6170	7743	4878	5005	5460	5396	5697	6085	5501	7237	5280	5213	9571	8520	8226	7237	8493	4484	8120	6855	4875	4484	6263	5902	5913	6137
IL-4	6213	6254	7974	6355	6500	6470	6629	7538	4872	4772	4889	5367	6010	5152	5400	6445	5033	5146	9002	7478	8369	6445	5778	4802	7221	4102	4498	4802	6389	5628	5684	6072
IL-4 R	6225	6756	7487	6820	7016	7617	6718	7439	4743	5147	5125	5570	5956	5000	5769	6689	5793	5361	8176	7149	8144	6689	5500	4803	7622	4533	4369	4803	9371	8041	7804	9036
IL-4 R	6660	6539	8293	7459	7047	7634	6913	7238	4965	5381	5087	5005	6610	5123	5213	6575	5141	6128	9446	7639	8403	6575	5898	5039	8756	4694	4531	5039	10229	8087	7623	10465
IL-5	8058	7337	9883	8446	8324	9536	8464	9551	6142	6159	30304	6812	7588	7210	7273	8469	6645	6346	8344	8095	8945	8469	6349	6507	8186	5560	5850	6507	11664	9408	8969	10499
IL-5	8176	7074	9349	9126	8221	8138	8105	9821	6395	7691	10362	6622	8262	7501	7851	8995	7083	6522	8077	8195	8835	8995	6751	7088	8370	5948	7354	7088	12164	9857	8887	10529
IL-5 R alpha	4300	3753	4801	3651	4715	4626	4780	5191	3294	3375	3289	3277	3861	3255	3136	4666	3452	3618	6488	5192	4911	4666	3614	3346	5052	2966	2981	3346	6031	5247	4784	5430
IL-5 R alpha	6319	5795	7370	6391	7477	8765	7138	8666	4934	4978	5114	5046	5941	4713	4827	6438	5342	5672	9939	9125	8199	6438	5712	4715	7740	4920	4646	4715	7857	7088	7257	8263
IL-6	7074	6391	10009	5483	7479	7486	7179	7782	19184	40742	7388	47895	6427	5395	5632	7612	6545	6040	7851	7297	7984	7612	5987	5652	7949	5668	5654	5652	9261	8696	7988	7947
IL-6	10081	8992	10782	8385	10814	10514	9888	11149	28345	73050	18359	45439	9536	7384	6868	9760	8315	8118	10665	10163	10279	9760	7821	8344	10456	7699	7292	8344	11820	27379	11284	11658
Positive 1	1798969	1786646	1824725	1747153	1792606	1692462	1747654	1778998	1531426	1362972	1526319	1444102	1559446	1617476	1599261	1506314	1574396	1629146	1526244	1687293	1515561	1506314	1742733	1187842	1594947	1183685	1148536	1187842	1634215	1521786	1686478	1661128
Positive 1	2033682	2022230	2134318	1992000	1970486	1850611	1966494	1968758	1639045	1531087	1594054	1652966	1830430	1791262	1667466	1584174	1758230	1767920	1754137	1893102	1592170	1584174	1925774	1335088	1745973	1398612	1342418	1335088	1728641	1725877	1726556	1845778
Positive 2	864358	900802	948446	854628	910600	856967	839408	886731	735802	716456	648454	698993	826156	818588	828456	733407	810899	799323	786019	864326	738336	733407	896816	132209	762748	63568	129838	132209	800525	795899	794534	824387
Positive 2	954617	1010992	998798	1022207	974388	958198	925207	967906	843395	866948	794168	793675	896153	879578	1026005	828233	915439	906977	891243	941177	827088	828233	962656	154312	901501	166207	161372	154312	892657	851133	906272	913559
Positive 3	1479305	1485786	1381236	1506231	1366415	1353151	1410391	1366380	1161446	1182879	1145996	1114062	1282455	1298354	1287816	1169820	1296627	1299083	1248452	1329056	1171388	1169820	1300725	670971	1258014	682273	619302	670971	1269685	1241540	1377994	1356568
Positive 3	1556537	1655591	1515938	1541231	1503962	1446763	1503487	1493481	1302959	1268013	1253165	1226696	1409561	1378492	1409635	1255692	1361909	1384286	1399860	1566818	1264345	1255692	1562216	715818	1243642	701680	656401	715818	1316210	1336114	1428865	1471441
neg	8117	6980	9107	8926	7249	9225	8418	10437	4840	4758	4553	5332	4714	4616	4331	6392	5318	5443	9557	6146	7731	6392	7651	5306	7846	4247	4205	5306	13829	6637	7157	12480
neg	7656	7268	8902	9282	6968	8923	7992	9676	4694	4770	4746	4906	5237	4391	4033	6122	5104	5001	9447	6820	7498	6122	5404	5427	7643	4124	4306	5427	13474	6465	6387	11156
IL-6 R	6494	7086	7443	5825	6637	7304	7085	7804	4950	5166	4849	4930	5123	4581	4436	5400	5214	5453	5280	5142	6668	5400	5439	4541	6376	4287	4159	4541	8022	5991	6008	8686
IL-6 R	5748	5626	7111	5337	6816	6189	6138	6631	4828	9803	4781	4843	5140	4465	4472	5892	5074	5204	9457	6380	7134	5892	5185	4993	6612	4386	4168	4993	9128	5995	6099	8450
IL-7	5913	5666	6732	5457	6377	6549	6460	6463	4730	4796	5007	4865	4907	4390	4724	6165	5528	4972	8290	5894	7531	6165	5735	4196	6953	4599	4069	4196	10216	6047	6348	7356
IL-7	6597	6087	7560	5758	6568	7585	6910	6994	5244	5024	4992	5073	5336	4840	4806	6352	5392	4993	9742	7102	7354	6352	5850	4349	7429	4710	4310	4349	9102	5868	5857	7849
IL-7 R alpha	6989	6581	7396	6820	7134	8098	7091	6854	4880	5193	4967	5000	5103	4938	5411	6804	5695	5408	9056	6936	7476	6804	6149	4455	7584	5079	5315	4455	8983	6001	6253	7780
IL-7 R alpha	6246	5714	7123	5696	7679	7459	7094	6513	5174	5131	5311	5232	5256	5043	5438	6916	5633	5585	8772	7482	7785	6916	6541	4518	7317	5220	5021	4518	8078	6323	6268	7185
IL-9	9675	13070	11929	9244	11527	11952	12388	12642	6755	7108	7265	6790	8919	7733	8921	9543	7477	7066	12649	10217	11425	9543	8487	6568	10505	6798	6632	6568	16362	13434	25316	15648
IL-9	10359	10229	11721	9534	12000	11452	12687	11385	6959	7542	7262	6923	9974	8301	10133	9636	7373	7058	12915	10107	11199	9636	8940	7028	10517	6755	6178	7028	14903	12941	13462	14486
IL-9 R	9675	9695	11860	10184	11152	13955	11463	13962	7786	8329	8641	17083	8213	7802	8306	9262	9403	10773	10989	9647	11792	9262	8622	7032	10582	7393	6949	7032	22223	35324	19504	25258
IL-9 R	10316	9259	13718	10718	10867	11449	14204	13408	10009	8600	9604	24574	7696	9066	7989	8976	9974	10632	11885	10609	11607	8976	8407	6605	10228	7118	6867	6605	44123	21509	27227	24147
IL-10	9521	9952	12970	12425	11880	11464	12264	14673	14936	9775	11398	20265	8690	9937	8744	12269	7523	7866	12483	13063	11603	12269	8654	7453	10241	8346	7683	7453	16618	14224	16185	19733
IL-10	9257	10098	12374	10177	13863	13431	13243	14460	35104	8488	12095	26854	9486	8655	9478	9853	8492	9418	11320	10301	11821	9853	8712	7904	10314	9240	7603	7904	16555	15540	15444	59627
IL-10 R alpha	9483	8972	12200	10433	9119	11313	10930	11003	6102	6304	6716	6259	9582	6393	6511	9038	6499	6795	11024	9581	26882	9038	6651	6358	10376	6419	5603	6358	10674	7268	8816	11567
IL-10 R alpha	7163	7298	9528	7663	7315	7918	8562	8380	4638	4880	4922	5390	5930	4935	5255	6648	5302	5236	7897	7439	8718	6648	5172	5220	6927	4812	4574	5220	6921	5896	6367	9087
IL-11	8091	7080	9017	7808	7501	7728	7274	7884	5105	5192	5323	4904	6823	6327	6115	7270	5595	5497	9128	7808	8347	7270	6710	5784	7418	5228	4889	5784	9894	8434	6812	7919
IL-11	7014	7078	9488	7837	8595	8501	7447	7170	5147	5022	5481	5129	6761	5732	6458	7410	5585	5597	9984	15994	9454	7410	6714	5180	8718	4062	4309	5180	8416	7921	6911	10009
IL-12 p40/p70	7167	6633	9111	9356	7026	8861	8673	6574	4886	5465	4867	4811	5558	5258	5736	7036	6424	5605	10122	7702	7722	7036	5469	5370	7721	4368	4066	5370	11796	7495	8391	10336
IL-12 p40/p70	7742	6957	7943	8682	7759	9183	7909	9205	4994	5021	5116	4938	5704	4855	5362	6962	5213	5508	9759	8038	11355	6962	5856	5766	7775	6019	5521	5766	11858	8317	8642	9362
IL-12 p70	8033	7572	10057	8590	8375	8361	8475	9162	6123	6662	7267	6300	5561	8152	9166	7058	6818	7116	9630	21399	8507	7058	5735	6933	8360	4610	4250	6933	13074	10858	10378	10207
IL-12 p70	7404	6781	10619	8955	8768	9512	9452	9468	6224	8395	8059	6228	6482	7101	7365	7371	6693	6592	10830	7957	9030	7371	6211	7226	8066	7765	6889	7226	13141	13130	10085	10474
IL-12 R beta 1	6632	6966	7802	6760	7264	7166	6809	6245	4871	5113	5630	4955	5433	5040	5048	6280	5511	5526	9183	67964	8464	6280	5348	5311	7602	6798	5659	5311	8148	5916	6133	7484
IL-12 R beta 1	6477	6473	6167	6107	7036	6916	6694	6222	4756	5216	5745	5017	5638	4818	5056	5931	5600	5521	5654	6439	7651	5931	5247	5022	6853	6442	5773	5022	11248	8001	6536	8428
IL-13	5839	5977	6401	5943	7870	8818	8568	10463	4740	4932	5341	5145	17270	8577	4521	5904	6487	7594	6535	6739	13046	5904	7944	5942	13217	9038	11051	5942	10491	9859	14027	10690
IL-13	6913	7103	8759	5796	8300	7673	9002	9275	4860	4842	5033	4758	11939	9872	42895	5997	7200	11781	6322	6495	15453	5997	8843	10683	12238	23757	17579	10683	15295	15488	30928	14403
IL-13 R alpha 2	6513	6534	7538	7506	6692	7025	6830	7549	4697	5303	5070	4907	5186	5143	4590	6453	5717	5457	7193	5847	7689	6453	4958	14703	7033	15748	15908	14703	8589	5685	5664	7456
IL-13 R alpha 2	6848	8751	7170	6206	6793	7545	7307	8019	4830	4863	5113	4861	5190	4777	4540	5879	5632	5144	7762	6154	7484	5879	5878	16411	7187	18170	17333	16411	7909	6066	6038	9376
IL-15	10052	9701	11514	11820	10685	10820	12550	12221	6163	7089	7218	9888	6995	14308	7102	8121	6917	6725	11672	8444	10575	8121	8151	6512	10124	6293	6121	6512	24074	16131	116316	17389
IL-15	13784	12022	13850	15195	8033	14451	11687	12356	10365	9346	8906	17396	6670	11255	7425	8465	10544	10657	14696	10746	10512	8465	7291	9553	9794	9713	9720	9553	38294	27419	45144	26387
IL-15 R alpha	9823	8237	10503	8484	10409	10750	11098	11133	76334	61292	117937	219813	8760	8801	11368	8512	8704	8923	9617	8226	12243	8512	8519	14358	10645	14638	14489	14358	34525	15711	50559	18551
IL-15 R alpha	10275	8721	11532	9746	10369	11292	11533	12731	130376	226036	66276	269063	8339	8321	12181	8713	8370	8285	10083	8447	11840	8713	8938	18865	10637	15237	15150	18865	42151	16683	16345	21235
IL-16	6573	5949	7643	5028	6732	8085	6820	7910	4893	4999	5068	4706	5199	4540	4951	6138	5346	5176	9342	6234	7587	6138	5685	5033	7031	4796	4543	5033	9824	7218	6636	9742
IL-16	6506	5649	6423	5214	348217	8211	7553	8549	5057	4950	4870	4980	5337	5076	18363	7365	5280	5323	9711	6128	7276	7365	5618	4792	7093	5372	4748	4792	10301	7109	6486	8778
IL-17	7972	7403	9795	6999	807271	7218	7271	7289	5123	5092	5260	5248	5656	5483	5734	6956	5679	5363	9892	6883	7871	6956	6054	5136	8066	7880	7337	5136	10576	9452	9971	11779
IL-17	8375	7442	8597	6822	8136	7810	7679	8788	5144	5699	5608	5185	6320	6066	6892	7073	5478	5472	9305	7700	8392	7073	6521	5077	8146	6757	7687	5077	11301	9516	9056	10551
IL-17BR	9856	9232	11496	10274	10817	11363	10110	11461	11397	32399	13439	10637	8600	6154	6653	9704	8010	8060	9251	9514	11583	9704	8873	6594	10345	7112	6423	6594	15622	11899	10604	13606
IL-17BR	9881	8859	12114	9579	10785	11239	10364	11864	12901	12111	10929	9922	8470	7180	8770	9049	7585	7927	9800	10069	11397	9049	9472	6420	10845	7244	6251	6420	16890	11587	10769	14500
IL-17C	6672	6400	8429	5193	7030	7247	6579	8380	4855	5111	4896	5257	5304	4719	5129	6544	5313	5591	9713	8352	7593	6544	5884	4707	7232	5126	4288	4707	9974	7107	12943	9175
IL-17C	5667	5672	5820	5543	7848	9527	8263	10707	5174	5087	5695	5032	4682	4616	4456	7313	5476	5914	8266	7582	8213	7313	6146	4774	8217	3996	3740	4774	9342	6940	7023	12430
IL-17D	7481	6957	9339	5902	7043	8301	7091	9088	5051	4951	4803	5009	5081	4810	4790	7074	5084	5519	9816	8422	8580	7074	5952	4708	7458	4325	3873	4708	12449	7176	6783	9874
IL-17D	7410	6935	9231	7726	7064	9223	7130	8241	4780	4935	4889	5463	5248	5444	8263	7055	6316	5585	8759	7775	8322	7055	6242	4912	8238	3795	3860	4912	10819	7001	6791	10263
IL-17E	9795	11255	16473	13336	30043	46061	42892	31447	6772	6503	7470	9848	15651	13652	27663	9926	11675	9040	13487	14011	72887	9926	10175	23864	30714	13242	12912	23864	114409	31612	26784	117811
IL-17E	9791	12246	17793	12575	31848	45384	62627	39995	6501	6922	7089	7758	20015	13670	33092	10159	12720	10801	13655	15033	57723	10159	15330	29192	27902	13433	16309	29192	119689	41313	24428	131972
IL-17F	7491	7283	9878	8275	7735	8951	7700	9800	4957	5105	4879	4624	5595	5298	5836	6609	5432	4838	9928	8138	8469	6609	5700	5052	7978	5063	4687	5052	11339	6981	6647	8903
IL-17F	6720	6209	7809	6212	7463	9378	7527	9569	4827	4846	5109	4723	5606	4652	5143	6472	5708	5001	9465	8073	8000	6472	5638	4978	7421	4392	4549	4978	11238	8365	7022	9309
IL-17R	9582	10021	14511	12522	22607	23169	17659	27095	6884	6623	6560	12203	7045	8105	13240	10571	19835	10655	13283	13295	17035	10571	11109	8891	11331	28581	6952	8891	35759	38053	27636	32837
IL-17R	12626	12067	14396	14720	26075	23763	25144	30399	6782	6435	6724	7931	7504	7794	9982	18453	21236	9702	13575	14204	18751	18453	11225	7928	14586	10871	9344	7928	42550	42389	31241	36493
IL-17RC	5819	5830	7717	7775	7078	8058	7478	8215	4971	4806	4893	4976	5271	5067	4553	7628	5360	5307	9909	7497	8622	7628	5586	4373	8035	4739	4267	4373	12718	6787	6841	8076
IL-17RC	5673	5827	7130	8295	7290	8859	7668	6890	5098	5100	4848	4849	5340	4710	4777	6786	5508	5423	10508	8020	8013	6786	5589	4491	7360	4324	4313	4491	11172	6617	6407	8843
IL-17RD	7122	5980	12382	7331	6804	7443	6918	6811	5063	5190	5645	5008	5012	4547	4748	6454	5319	5275	6093	6859	8261	6454	5092	4841	7811	5131	4181	4841	9297	5511	5976	8407
IL-17RD	5689	6850	8039	7393	7112	7017	6202	6880	4755	5049	5247	5041	5210	5021	4551	6321	5319	5088	6221	6607	7828	6321	4910	4684	8150	4592	4167	4684	9297	6542	6782	9624
IL-18 R alpha/IL-1 R5	6162	6174	6668	5414	6556	7291	6405	6455	4879	5275	5654	5030	5453	4552	5171	6160	5358	5059	6843	6797	8058	6160	5554	4617	7511	4825	4713	4617	10024	6329	6719	9000
IL-18 R alpha/IL-1 R5	6676	6877	7069	6977	6592	6503	6787	6982	4737	4850	5134	4768	5097	4988	4671	6120	5376	5436	9071	6760	8301	6120	5081	4362	7019	4647	4104	4362	9806	6118	5948	8766
IL-20	10051	9321	10617	9847	7032	7379	7797	7867	96185	8741	7243	155109	6673	6992	5929	7682	6877	6859	9425	7449	10207	7682	7065	6005	9733	6340	5547	6005	13031	8355	8079	11860
IL-20	8766	8532	14909	9077	7618	8818	8507	9842	122360	6261	8585	157094	6230	6173	5582	8130	6994	6925	9628	7444	9945	8130	7416	5974	9911	5666	5290	5974	10777	8463	8850	14341
IL-20 R alpha	40777	5965	7859	6951	7432	7764	7268	9415	4811	4915	4861	4890	5528	4870	5073	6531	5376	5429	6043	6427	8135	6531	6239	4953	45329	4731	5142	4953	9084	6917	7419	8913
IL-20 R alpha	7556	6550	8574	7957	6626	6967	7200	6974	5217	9150	4763	4864	6082	5975	5418	6330	5296	4730	6014	6319	6884	6330	5824	4778	17127	5013	4852	4778	8999	7899	69389	8560
IL-21	6099	6345	6766	5335	6219	6135	5688	6327	4730	4920	4852	4783	4629	4766	4059	6144	5237	4919	5684	6562	7147	6144	5485	4936	6895	4429	4429	4936	7685	5178	5288	7504
IL-21	6371	5378	6161	5349	6477	6172	5725	6545	4810	4821	4700	4758	5046	4691	3991	6243	5195	5063	5748	5873	7113	6243	5210	4981	7255	5915	5114	4981	12607	6930	6452	7347
IL-21 R	7015	6689	7787	7287	6285	6218	5934	5910	4681	4741	4755	4913	5192	4577	4396	6141	5525	5036	6940	5501	7711	6141	5569	4470	7065	4670	4438	4470	10057	6194	5843	10102
IL-21 R	7645	6921	7722	7004	6760	6857	5756	6670	4892	5015	5251	4923	5179	4659	5277	6791	5610	5372	6771	5825	7549	6791	5509	4785	7726	4687	4450	4785	10578	6107	6703	9601
IL-22	6388	5482	6248	8018	7217	7588	6816	9470	5556	6784	7555	11966	5535	4926	5928	6697	5438	5208	7207	6113	7223	6697	6086	5425	7035	5884	5195	5425	9588	6322	6015	8975
IL-22	6964	6719	8749	7946	7317	7531	7314	9357	5555	5607	8056	8467	5284	5214	5241	6620	5479	5399	9133	7590	7811	6620	5846	6034	7269	5969	5723	6034	9639	6973	6574	9170
IL-22BP	6875	6810	7896	6753	7984	8926	7387	6831	5381	5928	5559	5303	5389	6335	4894	7343	5429	6394	9622	7605	7976	7343	5951	4678	8087	4380	3963	4678	9959	8856	7738	11245
IL-22BP	7661	6992	8733	6967	7893	8632	7144	7831	5163	5522	6007	5116	6045	5181	5089	7426	8228	6092	8763	8558	7869	7426	9688	4823	7420	5104	4444	4823	10855	7834	7261	9175
IL-23	6444	6657	7960	6061	6960	8821	6496	8582	4835	5368	5181	5007	5040	4597	4867	6635	5464	5391	8667	7449	7616	6635	5554	4635	7417	4632	4150	4635	9937	6341	6059	8943
IL-23	6045	5558	6512	5190	6363	7716	6982	8667	5478	4903	4943	5013	5205	4617	4941	7033	5174	5495	8776	7174	7550	7033	6868	4476	7368	4460	4057	4476	10341	5822	6039	9297
IL-23 R	5613	4865	6382	4858	6417	9081	6883	8689	4785	4918	4827	4959	5118	4660	4970	6800	5315	5617	8440	7337	8070	6800	5659	4344	8317	4925	4347	4344	8891	6737	6119	9526
IL-23 R	5833	5256	6724	5591	6425	8749	6840	8384	4702	4932	4801	4937	5314	4326	8492	7091	5283	5053	7928	7841	8668	7091	5542	5066	7287	5067	4377	5066	7845	6180	6510	10267
IL-24	7500	7018	6330	5317	6010	8571	6841	7383	5026	4698	4474	4737	5089	3968	4307	6742	5303	5069	9769	7764	7661	6742	5077	3901	7326	4216	4053	3901	9271	5788	5496	7277
IL-24	5603	5346	6154	4938	6060	7038	6078	6483	4613	4772	4770	4774	5259	4324	4461	6369	5146	4960	7384	6552	8444	6369	5285	4635	7180	4256	3908	4635	8729	5775	5243	8058
IL-27	7328	7364	9326	8118	7076	9192	8061	7946	4951	4910	5044	4744	5414	4806	5183	6480	5271	5229	11289	8433	8935	6480	6306	5563	7796	5043	4968	5563	11607	6796	6696	9913
IL-27	7251	7144	9445	8032	6449	7370	7460	7639	4913	4793	4803	4758	5739	4776	5460	7018	5595	5488	10230	7977	8307	7018	5881	5095	9791	4581	4633	5095	9286	8146	6427	9102
IL-28 / IFN-lambda	6578	6223	9862	8070	6983	8396	7132	8417	5213	5179	4997	5511	5277	4978	5628	7024	5544	5124	10285	8459	8290	7024	5631	5255	8242	5306	4791	5255	11400	8634	7299	10079
IL-28 / IFN-lambda	6737	7124	10135	8886	7397	8431	8104	9213	5123	5105	5048	5085	6054	4872	5053	7256	5470	5652	10566	7885	8641	7256	5346	5137	8985	4880	4574	5137	11605	10323	7207	11224
IL-31	6594	6386	9408	9189	7268	9167	8169	8690	5347	5328	5429	5048	5919	4677	4342	7155	5263	5590	9049	8538	11774	7155	5418	5102	7941	4545	4215	5102	13605	8896	6568	12757
IL-31	6623	6468	8772	8515	7084	9340	7561	8814	5167	5202	5538	4888	6033	4987	5287	7091	5904	5557	9507	7377	8524	7091	5757	5108	8339	4394	4224	5108	13793	8263	5813	12663
IL-31 RA	5984	5693	7673	6889	6837	6435	6589	6770	4664	4876	5695	4888	5077	4984	8750	6627	5397	5251	6628	5429	8853	6627	5292	4907	7695	4199	3989	4907	9702	6315	8475	10917
IL-31 RA	6118	5973	7864	6228	6622	6290	5926	7071	4522	5102	5650	4840	5028	4665	4751	6662	5335	5137	7321	5906	8574	6662	5317	4304	7590	4401	4014	4304	10038	6386	6529	9087
Insulin	6689	5972	6493	7431	7641	7514	8263	7649	4730	5379	5469	5055	5306	5073	6616	7207	5802	5531	6704	7165	8458	7207	5443	4621	8193	5056	4486	4621	10226	6746	6903	9559
Insulin	6262	6594	6416	8119	6475	7849	8056	7640	4702	5102	5641	4847	5463	5021	5157	5676	5357	5134	7668	6108	8438	5676	5010	4629	7644	4903	4440	4629	9418	6772	6110	9301
Integrin beta 2 / CD18	6621	6038	7634	6945	6654	7182	7092	9226	4815	4961	5040	5282	3517	10626	2820	3772	5401	5134	12781	6134	5086	3772	3366	4718	4590	4392	3953	4718	10816	5640	5902	21597
Integrin beta 2 / CD18	7567	8378	9041	7524	8921	10452	10051	10875	6224	6426	6401	6283	6479	5935	5706	8391	6683	6122	9158	7387	9515	8391	6681	6271	8914	5803	5180	6271	15211	7770	8009	13317
I-TAC	9851	9031	9627	9241	8757	9337	9142	9403	6124	6090	6296	6102	6158	5718	5809	7158	6675	6714	9739	7357	9225	7158	6726	5509	17694	6122	4996	5509	12253	7669	7945	11799
I-TAC	6165	5781	7033	7059	6297	5943	6276	6000	4852	4947	4701	4636	4688	4467	3722	5698	4861	5000	7620	5741	7061	5698	5034	4200	6675	4089	4117	4200	8776	5496	5545	9153
KC	6671	6264	4499	7000	7299	7403	6414	7644	4613	4725	4630	4984	5030	4742	4524	6315	6825	5303	6280	5151	7276	6315	5245	4598	7396	4806	4152	4598	7526	5656	6135	8683
KC	6938	6733	7165	7400	6525	6561	6229	7187	4701	4578	4746	4574	5191	5028	4645	5825	5169	5126	6665	5608	7388	5825	5471	4457	6900	4604	4349	4457	9717	6047	5923	9238
Kremen-1	7808	6778	8447	6044	7803	8249	7246	7958	5144	5516	5749	5133	5663	5525	5182	6510	5778	5388	8438	5923	7533	6510	6023	4819	7278	5251	4770	4819	11987	6795	7082	8835
Kremen-1	6699	6121	6915	7789	7597	7518	7168	7115	5197	5216	5645	5362	6007	5194	5233	6824	5751	5916	5918	5049	7780	6824	5936	4925	7293	4298	4116	4925	9132	6661	6634	7898
Kremen-2	6442	5498	6611	7420	6951	7303	6854	8556	4882	6275	5119	4893	5540	4632	5274	6617	5403	5286	7975	6415	7073	6617	5626	5347	7781	5595	5388	5347	8493	6710	6555	9381
Kremen-2	7522	6901	8874	7583	6591	7713	6778	9275	5137	5186	5010	5181	5807	5048	5090	6290	5523	5449	8683	6905	7168	6290	5856	5289	7196	5534	4888	5289	9714	6458	6570	9146
Lefty-1	7613	7164	9357	7741	7264	9393	8129	10675	5462	5545	5272	5090	5526	5159	5252	7141	5555	5794	8941	7935	8336	7141	6251	5287	7665	5018	4948	5287	8519	7104	7126	9615
Lefty-1	7534	6891	8937	7125	7116	9187	8210	10185	5108	5427	5351	5337	6145	4671	5307	7584	5603	5923	7780	7647	8477	7584	6512	5104	7751	5047	4615	5104	8934	6479	13303	8923
Leptin R	7274	7222	9454	7251	6607	9874	6616	9253	4858	5219	5189	5148	5105	4559	4961	6527	5631	5363	10547	8185	7648	6527	5601	4553	8124	4660	4242	4553	10454	6162	7186	9024
Leptin R	7066	7084	8316	7021	6645	7923	6809	8347	4861	4965	4897	5109	5621	4585	6158	6991	5345	5392	10292	8180	8932	6991	8156	4610	7526	4851	4251	4610	9764	6187	6386	9732
LEPTIN(OB)	6008	4607	5834	6948	6534	15119	7245	8512	4779	4949	4821	4753	5039	4220	4959	6400	5387	5184	9154	7470	7764	6400	5406	4223	7091	4176	4039	4223	8702	5795	6388	8745
LEPTIN(OB)	6210	7093	9450	7764	6129	7388	6345	7158	4754	4858	4953	4917	5099	4253	4148	6658	4996	5295	8027	7179	7124	6658	6707	4787	7243	3961	3840	4787	9727	5951	5776	9240
LIF	8713	9069	11112	10341	9275	12102	10564	12567	35442	6708	33733	54193	7783	6956	7534	10222	8242	8212	10070	9595	12144	10222	6230	6303	10298	6978	6470	6303	16990	9131	8878	15134
LIF	9785	8705	11057	10700	9157	12136	10632	12815	37530	8880	34240	51650	7609	7018	7989	9297	8244	7691	10592	9856	10914	9297	7466	6742	10331	6968	5852	6742	17165	9576	8738	15515
LIGHT / TNFSF14	6033	6468	8152	7794	7059	7368	8349	7062	5284	5914	5088	5032	4980	4232	16340	6907	5768	5328	7838	7578	8027	6907	5770	4948	8033	5032	4720	4948	11038	6682	6337	9455
LIGHT / TNFSF14	9364	6110	8710	7988	6999	6682	6265	7331	4924	4998	5171	4728	4998	11268	7847	6501	5422	5519	8231	8052	7950	6501	5991	4968	7656	5216	4676	4968	9858	8006	6683	10234
LIX	5528	5548	8934	8263	6748	8311	7068	8981	5024	5241	4941	4992	5568	4356	5395	6769	5429	5510	10304	8152	8054	6769	6016	5109	7642	4311	4214	5109	11514	7151	6473	10776
LIX	5514	5423	8954	9377	6756	9198	7878	9340	4962	5552	4933	4943	5346	4608	4934	6548	5484	5669	9478	8049	8222	6548	5473	4475	7927	4512	4344	4475	11062	7703	6257	9425
LRP-6	8377	7722	11676	10823	9181	11708	9837	9997	20189	9205	8421	19726	6906	6146	6384	8250	7287	7008	9658	10547	10646	8250	6508	6733	9783	6721	6200	6733	17507	10387	9673	14519
LRP-6	8164	8225	11929	11539	9134	10535	10237	10983	27108	14553	8471	14748	7109	6445	6257	8709	7395	7493	12765	13145	10925	8709	6596	6537	9467	6315	6054	6537	15478	10351	8470	12303
L-Selectin	9244	7740	10936	10488	11100	12768	15025	18158	6298	6753	7549	6485	5774	6005	4744	7053	7380	7412	10806	8791	9028	7053	5684	7318	8156	6900	6508	7318	23934	12445	11553	17858
L-Selectin	9297	8211	11155	10995	11991	13685	16390	15616	6553	6475	6678	6683	5871	9910	5108	6789	7496	7139	11127	8994	8489	6789	5991	7248	8282	6761	6539	7248	19011	11513	11988	18861
Lungkine	6869	6693	8493	8474	7196	6320	7618	7513	5063	5427	5567	5221	5817	5973	5496	6769	5396	5528	6511	5621	8623	6769	5531	4805	8172	4684	4473	4805	11008	6789	6996	10354
Lungkine	6792	6033	7949	8709	6749	7939	7534	8004	4773	5779	5892	4931	4793	4570	4551	6720	5145	5263	6763	6139	8377	6720	5472	4800	7777	4252	4214	4800	10349	6803	5932	10384
Lymphotactin	7150	7541	8340	9745	6783	7668	8665	11117	18229	11889	8872	23778	6695	5942	6348	8225	7011	6683	8951	7522	9970	8225	6469	4532	9902	4257	4015	4532	9253	5988	5471	8900
Lymphotactin	7365	9911	11130	9961	8486	9051	11146	12959	17753	8592	8289	16052	6200	5766	5240	7486	6603	6525	8919	7229	9082	7486	6796	5917	8289	6104	5629	5917	12631	7988	7561	11902
Lymphotoxin beta R / TNFRSF3	7092	7154	7937	6658	7021	8287	7693	7426	4572	5036	4913	5057	5001	4589	4509	6048	5267	5056	7722	5911	7911	6048	5108	4538	6625	4743	4242	4538	10397	6351	5810	9239
Lymphotoxin beta R / TNFRSF3	7855	7137	9308	8864	7536	6788	7354	6931	5065	4765	4810	4840	5208	4633	5149	5645	5322	5448	6350	5217	7745	5645	5649	4684	6733	4252	3973	4684	9402	6697	6628	9136
MAdCAM-1	7223	6255	7503	7725	6769	7712	8131	6835	5077	4875	4897	4806	5245	5118	4395	6349	5047	5255	6870	5802	7850	6349	5443	4667	6876	4444	3853	4667	8667	6240	6527	10104
MAdCAM-1	9458	5899	8146	6414	7095	7374	8585	7051	4846	5018	4922	5289	5180	4873	4646	6389	5229	5624	5701	5267	8602	6389	5283	4657	7198	4517	4103	4657	9157	6233	6665	10034
MCP-1	9377	8672	8435	7822	8079	8161	7918	8016	5638	5633	5898	5916	6587	6798	7225	6814	6287	6326	8185	6621	8214	6814	5978	8198	7595	9593	8599	8198	13312	9361	10351	10648
MCP-1	9200	7552	8816	7770	7949	8857	8041	8666	5598	6545	6641	5784	7800	8158	7284	8249	6050	6394	9267	6720	9309	8249	6831	7802	7789	9581	9526	7802	12975	8679	9672	11590
MCP-5	6869	5971	6303	7926	6681	7745	6514	8142	4997	5136	5132	5060	5226	4802	5026	6220	5276	5089	6324	5851	7321	6220	6000	4856	6902	4689	4290	4856	8330	6445	6627	9130
MCP-5	7430	6561	7887	7038	6632	7738	6283	8793	4904	5097	4971	4825	5231	4776	4792	6213	5361	5468	8177	6496	7410	6213	6007	5079	7216	4435	4405	5079	8744	6483	6411	8871
M-CSF	7696	6616	8535	7252	6555	9350	7545	7160	5005	5340	4923	5227	4988	4775	4591	6382	5691	5488	8078	7161	7385	6382	5972	4547	7267	4752	4236	4547	10366	6261	6342	9106
M-CSF	7852	7484	9583	8589	6526	8013	6383	7154	4977	5193	5136	5217	5088	4896	4861	6136	5228	5650	10170	7827	7539	6136	5765	4459	7430	4184	4209	4459	8278	6115	6485	9291
MDC	7227	6953	9751	7374	7547	10417	11659	11326	5508	5283	4931	5253	5347	5168	5367	7019	5437	5504	7114	6595	7642	7019	6041	5385	7541	5450	5126	5385	9983	6612	6259	9297
MDC	5979	5477	6335	8500	7938	10094	10436	10928	5091	5619	5164	5354	5501	4485	5241	7163	5598	5378	7621	6539	7676	7163	5978	5375	7735	5468	4976	5375	8598	6325	6374	9601
MFG-E8	7923	7250	8018	9987	10104	13342	11883	14634	7662	7747	49112	37561	6996	5589	5561	8672	7468	7391	8152	8835	11485	8672	9912	6221	10879	6763	5331	6221	13664	10076	9123	12071
MFG-E8	12207	10659	11870	13123	13151	16736	18606	21043	9514	12068	75775	40036	9270	8112	9605	11911	9702	9736	12653	12126	13752	11911	11134	9096	13267	8843	7642	9096	18518	13108	11281	17354
MFRP	6765	5862	8355	6182	6474	7232	6533	7679	4696	4947	4670	9944	4868	4152	4451	6916	5272	5168	8958	7759	7854	6916	5522	5098	7604	4238	4049	5098	8807	5572	15124	7527
MFRP	7072	6463	8965	6793	6374	7138	6573	7186	4685	4971	4869	4712	5016	4482	4863	6762	5598	5207	9351	7275	7437	6762	5596	5336	7847	4546	4458	5336	7896	5674	5394	7394
MIG	6589	7142	8917	7917	6522	6975	7455	9738	4654	5168	5058	4877	5093	4050	4277	6311	5345	5145	9498	9188	7041	6311	5466	4759	6418	4665	4197	4759	8645	5487	5517	7197
MIG	6123	5850	8149	6804	6807	8599	7346	9086	4820	4705	4999	4874	4928	4228	4657	6682	5142	5305	9820	8903	7581	6682	5041	4237	7368	4412	4115	4237	33885	6599	6042	8923
MIP-1 alpha	5956	5230	7239	7507	6788	8211	7184	8279	4774	5676	4869	5020	5028	4548	4519	6503	5483	5246	10260	7555	7991	6503	5016	5182	7837	5046	4301	5182	9353	7159	5834	8075
MIP-1 alpha	5962	5788	7643	7745	7359	8372	7317	8484	5028	5317	5000	4832	5102	4696	4535	6817	5288	5426	10619	8801	7752	6817	5101	4535	7830	4338	4327	4535	10638	6584	6231	8829
MIP-1 gamma	5998	5920	8744	8309	7505	8724	7795	9152	5077	5289	5158	4939	5814	4464	4858	6395	5380	5329	9297	8070	7946	6395	5636	4777	8060	4525	4346	4777	17782	30266	6700	9880
MIP-1 gamma	5327	5440	7225	8523	6850	8152	7433	8934	5062	5295	4895	4959	5579	4703	4685	6323	5396	6087	10140	8614	7740	6323	4861	4415	8001	4340	4368	4415	25384	90694	7574	11538
MIP-2	8438	7006	10808	8234	7562	9021	8590	9376	4614	5084	5269	4812	5529	5218	4775	6828	5979	5669	8217	5965	8927	6828	5666	4843	7819	4835	4247	4843	18569	11508	8147	11435
MIP-2	7684	6524	10313	13423	7595	8608	10315	10097	4753	4964	5134	4700	5353	5626	4668	7044	6209	5618	8526	6049	8566	7044	5372	4365	7955	4410	4355	4365	20650	12231	8769	10541
MIP-3 alpha	5480	5863	6644	5587	6361	7100	6471	7615	4555	4970	5211	4950	4922	5384	4927	6252	5236	5115	6121	5245	7909	6252	5002	4973	18089	4006	4224	4973	13799	6465	5822	9338
MIP-3 alpha	6841	7181	7055	5889	6482	7184	7364	7198	4625	5045	5428	4735	4952	4659	4327	6085	5456	4813	7233	5831	7913	6085	4901	4450	24687	4430	4199	4450	8837	5858	6371	8753
MIP-3 beta	7474	6801	9670	7532	6449	7649	6506	8636	4974	5036	5536	4822	8172	4330	4210	5746	5154	5097	7595	6036	7671	5746	4905	4199	7575	4290	4189	4199	9910	6342	6057	8854
MIP-3 beta	6829	6204	7962	7015	7139	7375	6657	8442	4718	5022	4793	4969	5317	4627	4501	5858	5095	5064	7708	5739	7680	5858	5103	4050	6646	4551	5070	4050	9908	6003	6190	8599
MMP-2	13064	25623	13535	13181	36255	28445	83926	39499	132677	5986	6288	10048	7006	6127	12560	7862	10828	69020	17906	15870	42332	7862	7093	7839	239654	9136	9987	7839	1038196	1445521	1137118	325802
MMP-2	33628	35527	22006	17991	89914	44216	21318	685305	127455	8184	8244	286606	7048	7169	15074	7927	21226	16588	17947	24002	40220	7927	7038	10452	38119	13147	12366	10452	799209	104389	1266966	578726
MMP-3	5966	5814	7095	5897	6264	7267	6866	7756	4376	4744	4812	4618	4732	4256	4304	5848	5106	5153	7701	6028	6627	5848	4885	4263	6923	4475	3664	4263	9823	5874	6052	9275
MMP-3	6755	6543	7999	6454	6866	7646	6422	8123	5146	4906	4900	4846	9525	4521	4155	5800	5409	5053	7285	5868	6872	5800	4952	4328	7118	4511	3958	4328	10393	6034	6044	9380
MMP-9	6580	5575	6752	5160	6280	7473	7512	8338	4788	4953	5157	4789	5234	7186	4610	5810	5437	5107	8470	6462	7115	5810	6120	4374	7464	4694	4235	4374	11413	6486	6230	8801
MMP-9	6959	6120	6919	6147	6436	7439	6420	8982	4850	5189	5593	4816	5034	4564	4752	6387	5389	5185	8876	6108	8409	6387	5736	4391	7455	4727	4323	4391	10752	6033	7579	8220
MMP-12	7071	6084	7997	7141	6499	7735	6605	7990	5161	5342	5283	5371	5250	4760	4861	6382	5347	5508	8594	6489	7198	6382	5624	4567	7678	4604	4270	4567	11181	6550	7346	8106
MMP-12	7624	6242	8609	7224	6633	7173	7364	9128	5011	5281	4946	5069	5381	4759	4681	6613	5356	5568	8184	6765	7562	6613	5807	4636	7280	4833	4112	4636	8699	5885	6070	8106
MMP-14 / LEM-2	7751	7180	8731	6974	7741	7657	6755	7491	5395	6143	5651	5473	6013	5733	5937	6829	5877	5852	8204	7349	7927	6829	6755	5641	7722	6184	5948	5641	10156	8528	7743	10004
MMP-14 / LEM-2	8259	11435	9512	7994	7695	8565	7260	8606	5470	5448	5075	5449	5908	5293	5567	7529	5899	5933	7121	7567	7421	7529	6015	4926	7368	4637	4545	4926	9896	7460	7722	11751
MMP-24 / MT5-MMP	9611	9387	12586	10850	10944	15302	12966	20397	99010	110406	93639	204093	9893	8494	12750	9928	7443	7345	8197	8143	28068	9928	9876	7467	11722	7140	6711	7467	67603	11556	10328	19654
MMP-24 / MT5-MMP	9805	8855	12141	9531	14763	15684	15907	19637	116788	165350	176783	285144	8566	8047	15003	9682	8738	7484	8521	8264	19583	9682	9939	8285	11213	9699	8267	8285	60489	11763	11014	20293
Neuregulin-3 / NRG3	6368	5581	6531	5586	6515	7360	7438	12501	5159	5156	5133	5260	5173	4624	4714	7218	5683	5468	9175	7492	7858	7218	5773	4714	7225	4816	4507	4714	7827	6757	6527	8399
Neuregulin-3 / NRG3	6865	6591	8665	6551	6456	6656	6464	7180	4779	5056	5033	5746	4980	4310	4759	6741	5295	5415	7490	7316	7641	6741	5512	4671	6970	4661	4293	4671	8039	6080	5710	7700
Neurturin	6741	6227	8200	6777	5853	6767	6174	7048	4560	4863	4942	4391	5470	4025	5149	6449	5541	4906	7925	7912	7271	6449	5168	4612	6695	4569	4377	4612	7418	6596	5176	7706
Neurturin	6666	6807	7480	7161	5829	7609	6286	7528	4576	4847	5027	4864	4579	10264	4329	6474	10039	4867	9425	7409	7175	6474	5424	4261	7100	4578	4305	4261	7929	5931	5444	7139
NGF R / TNFRSF16	7018	6620	9939	7103	6626	7490	7536	7154	5012	4978	4996	5084	5078	4268	4456	6778	5748	4893	8972	9120	7888	6778	5024	4504	7194	4350	4474	4504	7883	6035	5630	7517
NGF R / TNFRSF16	6910	7005	10098	7280	6053	7689	6900	7187	4716	5585	4722	4934	4843	4360	4876	6858	5382	5131	10547	8923	7431	6858	4887	4585	7620	4724	4352	4585	8270	6698	5992	7250
NOV / CCN3	6697	5832	8202	7339	6850	8088	7407	9952	4728	5397	5224	5492	5380	4507	5403	7152	5622	5185	10036	8160	8051	7152	5659	5288	8063	5533	5488	5288	10264	6521	6469	8261
NOV / CCN3	6045	5582	10974	7934	6589	7127	6420	9115	4653	5533	5080	4644	5073	4731	5503	7135	5783	5842	8458	7996	7843	7135	5617	5436	7723	5806	5692	5436	8236	7422	6094	7366
Osteoactivin / GPNMB	8056	7910	12137	11157	9818	11776	9937	12176	17269	9547	11153	31382	7048	6060	7442	8652	7549	7492	10960	9849	10368	8652	7125	5856	10464	6699	6418	5856	30934	33336	9880	13336
Osteoactivin / GPNMB	8461	8967	12648	11317	9615	11002	10613	12245	23307	14424	13187	24918	6911	6393	6662	8484	8394	8092	10411	10387	11045	8484	7147	6266	9564	6253	5914	6266	29676	23988	10591	14222
Osteopontin	6271	5852	7794	6951	7285	8119	7314	8226	4833	4872	5016	4914	5469	4595	4597	6473	5519	5369	8614	6692	7845	6473	5217	4818	7543	4608	4299	4818	9471	6576	6525	9922
Osteopontin	7083	6398	8224	6792	7135	8655	7343	8107	5001	4788	5139	4900	6173	4766	4845	6299	5348	5182	8545	6254	7355	6299	5424	4502	7722	4841	4343	4502	27082	7150	7544	9427
Osteoporotegerin	6623	6122	7626	5509	14033	18463	21229	21835	4937	5124	5005	5142	5835	5301	5382	6981	5664	5788	7490	6117	9201	6981	5655	5332	7843	5129	4722	5332	9974	18426	20578	9947
Osteoporotegerin	6251	5710	8353	6430	14940	17209	20725	20343	4881	4974	5114	5025	5408	5870	5503	6493	5392	5299	8697	6400	9034	6493	5421	5893	7555	4717	5210	5893	15064	18091	46344	9874
OX40 Ligand / TNFSF4	6038	6129	7735	5619	6527	7268	7202	8671	4816	5858	5781	4890	5512	5159	5282	6083	5611	5428	6081	5616	8081	6083	5202	4642	7376	4882	4693	4642	9073	7642	7144	10148
OX40 Ligand / TNFSF4	6541	5979	7613	6515	6532	7749	6968	9170	4877	4842	5018	5063	5092	4960	4617	6206	5160	4948	9153	6519	7919	6206	4930	4564	7428	4890	4851	4564	10728	7224	7139	12103
PDGF C	8582	8788	9555	8464	8501	9322	9078	9734	6496	6274	6382	6077	6326	5842	5756	8132	6883	6567	10354	7808	10221	8132	6629	5692	8826	5401	5415	5692	11731	7663	8004	10757
PDGF C	8893	8585	10104	10339	8904	8490	8568	9409	6020	5974	6298	6278	6214	5495	5652	8233	6766	6522	10064	7811	9247	8233	7132	5735	9440	5743	5110	5735	12250	8373	42694	10618
PDGF R alpha	6668	6371	7805	6458	6476	7100	6537	11724	4892	4667	4865	4909	4782	4241	4496	6332	5088	5025	8566	5996	7628	6332	5157	4268	7014	4406	3902	4268	8921	6074	5878	8092
PDGF R alpha	6083	5981	6983	5668	6464	6520	6091	8814	4898	4597	5132	5000	4923	4135	4583	6088	5270	5027	8793	6462	21797	6088	5240	4321	8103	4606	4370	4321	9014	5900	5831	7927
PDGF R beta	7851	7108	7474	6216	7854	8443	7944	9152	4680	6363	6082	4932	6100	5555	8277	10748	5791	5364	9005	6643	18890	10748	6501	12230	17178	11277	12010	12230	12535	9011	22924	13528
PDGF R beta	8040	8017	7583	6395	7282	8456	8088	11202	4987	6962	5578	5071	5761	5702	6496	13682	5394	5262	9147	6240	22994	13682	7814	10919	16156	9531	11867	10919	13452	7989	13122	11164
Pentraxin3 / TSG-14	7878	7298	9392	7422	6987	8490	7814	10806	5271	6019	5409	5054	5390	4915	5198	6327	5638	5564	7932	5978	7100	6327	5791	4958	8315	6115	4888	4958	11566	7874	7093	10436
Pentraxin3 / TSG-14	7200	6690	8860	7458	7238	7960	7023	8626	5253	5999	5418	4973	5750	4947	5075	6586	5530	5673	8266	6921	7984	6586	5984	4635	7694	5024	4882	4635	10724	7464	7017	9771
PF-4	9713	8553	11346	9540	9401	11377	9811	13610	6599	6970	6581	20599	6198	5491	5999	6763	7232	7156	11559	8682	8045	6763	6362	6308	8202	6307	5871	6308	41569	26629	20388	22313
PF-4	7091	6221	7572	6285	7164	7774	6825	10380	5516	5213	4893	4766	5535	5090	6285	6802	5499	5396	9788	7305	8453	6802	6217	4645	7664	5356	4607	4645	28433	18160	16988	16811
PlGF-2	7822	7343	9762	7499	7566	8327	6943	12181	5020	5159	4812	4999	5232	4681	5094	7225	5392	5468	10232	7803	7714	7225	5912	4710	7477	4325	4290	4710	8529	6409	6446	8697
PlGF-2	6517	6342	7999	6827	7785	8105	7246	11561	4941	5002	4992	5015	4898	4875	5307	7052	5325	5486	9991	7031	7423	7052	5764	4406	7641	4341	4302	4406	9316	6777	6280	8738
Progranulin	7394	6734	9652	8307	7878	8960	9222	10220	4794	4870	4972	4865	5369	4980	6071	12378	5777	5955	8444	6425	8175	12378	6092	6256	7570	6256	5457	6256	12495	8126	7794	10869
Progranulin	7733	7081	9912	7370	7966	9356	9080	10160	4680	5032	5002	4872	5582	4613	5944	6710	5886	6112	8533	7602	8205	6710	5853	6950	7289	6333	5392	6950	12158	7726	7568	11896
Prolactin	13102	13477	18506	13076	13811	20427	17036	19636	9543	11471	13872	28346	7288	6864	10046	9329	10321	10449	15032	13137	16256	9329	13360	11701	15120	9227	9606	11701	33630	16730	13554	29432
Prolactin	12915	12277	16899	13786	14981	29073	17751	22097	8302	12170	18744	40911	7356	7363	13814	9075	10957	9601	15861	12869	15828	9075	16154	10264	14380	10588	9741	10264	38205	16472	14262	32260
P-Selectin	31068	60180	41397	43148	67789	86375	100506	103789	6413	6776	6283	5984	26892	22244	91107	23055	47596	12989	24973	28193	44144	23055	41842	24937	50077	24552	21994	24937	150725	133924	155304	243776
P-Selectin	34726	65535	81227	37198	69028	82649	107259	103290	6457	7049	6980	6379	24168	12470	98108	23428	47443	17949	23971	28022	49950	23428	39379	24433	50323	43051	35672	24433	158598	152426	170831	239505
RAGE	7391	6922	10617	7833	9774	16554	11752	15030	4953	5386	5144	5723	5307	5126	5123	7130	5412	5346	10307	9040	8848	7130	7113	5315	8423	5352	4745	5315	16076	12816	10807	13092
RAGE	7540	7949	9031	8308	9445	13147	9444	16567	4916	5416	5349	5246	5407	5026	6138	7054	5950	5760	10617	8873	8359	7054	6832	5125	8385	5044	5091	5125	17274	15359	10640	13144
RANTES	6381	5589	8648	8783	7660	10564	8965	12166	5265	5522	5508	12559	5790	4708	5674	6720	5694	5567	7597	7506	8386	6720	5841	5117	8037	5049	4723	5117	11808	9557	9042	9592
RANTES	6163	6483	8852	8371	8027	10465	9738	12144	4856	5467	5278	5599	5705	4694	4827	6511	6048	5599	7661	7236	8054	6511	5154	5042	7702	4697	4519	5042	11819	9099	8970	10428
RELM beta	6892	6834	8119	7292	7885	8629	8635	8001	4919	5501	4974	4972	6225	5529	5383	6794	5834	6254	8186	6775	8921	6794	7015	5767	8309	5987	5615	5767	15532	23266	9086	12114
RELM beta	7003	6636	8361	6481	7720	9465	8330	7771	4955	5485	5063	4999	5392	5221	5311	6697	6644	5569	9254	6743	7761	6697	5376	4906	8278	6695	4306	4906	33303	12204	9247	12572
Resistin	10335	6489	7946	6104	7081	9255	8850	7331	4873	5260	5037	5029	5501	6176	4573	6746	5406	5502	7460	5961	8152	6746	5631	4788	7911	3998	4018	4788	10496	7202	7825	10493
Resistin	5956	6917	6794	5327	6841	8150	7468	6345	4627	4965	5051	4998	5533	5125	5090	6443	5427	5130	7667	5873	8271	6443	5108	4539	7738	4254	4145	4539	9163	7175	7526	10225
S100A10	5958	5682	6762	5029	6174	7141	6365	6873	4563	4886	5157	4822	5989	4883	4359	5941	4935	5040	7781	6044	8258	5941	4654	4346	6777	3995	3943	4346	12089	6614	5910	8779
S100A10	6991	5671	7053	4930	6759	6754	6494	8444	4812	4822	4888	4970	4688	4325	4111	5502	5056	5237	10005	6709	7466	5502	4828	4524	7015	4126	3835	4524	8246	5776	6164	8525
SCF	5179	5382	5620	8414	6260	7189	7082	6581	4472	5010	4889	4671	4622	4087	3973	7229	4998	4790	6680	5446	7868	7229	4914	4180	7024	3913	3864	4180	9470	6736	6627	8210
SCF	5539	5898	5807	6667	5960	6602	6182	7536	4590	4632	4637	4439	4837	4009	4188	6413	5151	5104	7087	5467	7837	6413	5269	4183	7207	4427	4199	4183	8551	6109	5779	8176
SCF R / c-kit	6105	5643	6714	4943	7735	8834	8962	11242	4729	5175	4958	4773	5265	4524	4644	5880	5146	4911	8759	6784	7284	5880	5559	4605	7095	4273	4093	4605	10449	6224	6397	9468
SCF R / c-kit	7381	6373	8566	6819	7255	8497	7436	11631	4673	4767	4846	4796	4994	4375	5384	5694	5199	5039	6967	6064	7922	5694	5350	4761	7371	4485	4028	4761	13629	6519	6938	9947
SDF-1	7479	7020	8033	6937	11514	14588	13157	25871	6435	7275	7595	12485	11233	23776	37684	10822	6876	6888	11865	8738	22184	10822	15206	7600	18053	32169	19879	7600	17450	10996	14077	13589
SDF-1	8461	8083	8313	7610	10373	14558	10710	23947	6521	10861	7494	11174	11049	26242	38392	11316	7017	6929	11893	8427	15952	11316	14533	7950	15317	31268	22279	7950	15955	10720	19199	13595
Serum Amyloid A1	10436	9675	13572	10293	8689	9473	8172	11351	6382	6942	6889	6529	5174	4763	5015	6487	7269	6996	10636	8497	7923	6487	5783	6492	7549	5785	5729	6492	14087	8341	37088	12644
Serum Amyloid A1	8921	9164	10272	8394	9394	10834	9739	13763	6513	8193	6609	6751	5235	4705	4926	6664	7062	8057	11765	8455	8261	6664	5632	6015	30282	5993	5730	6015	13336	8023	8083	11673
Shh-N	7784	7125	8988	7475	7454	9252	8316	11153	5582	5201	4984	5216	5132	6155	6517	6324	5367	5270	7437	6226	7395	6324	5812	4926	7779	5029	4467	4926	8748	6916	6547	9078
Shh-N	6424	6163	8012	7549	7147	7329	5831	11544	5063	5113	5055	4826	5737	6927	5049	6237	5436	5357	7191	6986	7836	6237	5831	5145	7478	4993	4371	5145	10003	6652	6053	8882
SIGIRR	14620	15571	13178	10539	14439	13724	13425	17379	59491	19642	18638	60220	9833	10360	9878	10212	15350	16689	17201	18128	10705	10212	10093	16847	9976	39983	22287	16847	19476	13747	14196	17423
SIGIRR	14559	13611	13723	10408	13280	13497	14075	16360	60628	18851	17518	58330	9438	9322	9558	11305	15695	15762	16995	16164	12590	11305	9514	16839	11462	18627	20316	16839	18663	14571	12957	16870
SLPI	8283	7577	10343	8414	12856	13827	13802	14512	4768	5073	4863	4925	6559	7962	6565	7146	5480	5310	9612	7104	9331	7146	7130	11959	8077	16104	10085	11959	17623	15454	12170	13585
SLPI	8124	7415	9772	7562	12138	13600	14181	14139	4545	4859	4763	4727	6417	7817	7211	8935	5604	6175	9132	7435	9425	8935	9135	12406	9427	17554	11763	12406	18831	15877	14332	14654
Soggy-1	9200	7940	11850	7920	8947	11443	9453	14174	6311	9117	9325	8168	6341	5711	10529	8980	6942	6894	11718	9864	10513	8980	8559	6697	9686	5930	5612	6697	13702	8880	7899	12430
Soggy-1	8459	7933	13790	8948	9018	13248	12973	12886	6512	6447	12976	9840	7112	6135	10313	8919	6864	6790	12836	10332	11820	8919	8573	7368	9808	7819	7327	7368	16305	9146	8475	13920
SPARC	15762	12000	14536	13139	14381	19597	27012	19926	8464	10189	18797	16096	14406	10559	17555	11835	9993	9424	15414	16017	16994	11835	9121	10299	12573	11474	11936	10299	26900	24411	19208	31673
SPARC	14631	13297	22521	16557	17989	21796	68650	24126	10482	12414	35781	18153	15398	8110	11609	11397	9954	11683	18508	18880	17852	11397	9648	13868	13513	12885	13865	13868	36159	25073	22101	35374
Spinesin Ectodomain	6213	5529	7566	8109	6658	7548	6870	8693	5022	5786	5762	5316	5436	4578	4698	6967	5823	5325	7004	6282	7298	6967	5161	5040	7755	4478	4122	5040	10183	7012	7627	11661
Spinesin Ectodomain	5721	5693	7621	7770	6887	7151	6373	7473	5233	5482	5387	5294	5301	4805	5300	6708	5733	6140	9147	8138	7792	6708	5169	5017	7247	5070	4806	5017	12914	9025	7079	9686
TACI / TNFRSF13B	6187	6150	7521	5851	6720	7449	6860	7877	5051	5119	5019	5219	4722	4564	4117	6700	5542	20596	8861	7997	8398	6700	5322	4781	8912	4608	4457	4781	8931	6945	6101	8352
TACI / TNFRSF13B	6601	6493	7591	5095	6827	7207	7063	8262	4991	5485	5252	4983	5780	4851	4688	6327	5582	6373	8524	7243	8723	6327	5216	4779	7875	4878	4589	4779	9370	6749	6218	8519
TARC	5762	5936	6675	8212	7185	7818	6746	8285	4410	5234	5308	5016	5372	4413	4681	6618	5393	5284	6736	6315	9110	6618	5830	4362	7768	4672	4704	4362	9042	6531	6215	8554
TARC	8320	5865	6293	8054	7981	6815	6300	7727	4800	5000	5446	4742	5310	4986	4692	6431	5537	5426	7397	5672	8289	6431	5281	4266	7611	4874	4503	4266	8552	6304	5848	7868
TCA-3	7796	7369	8496	7087	7375	7845	7814	8256	4965	4958	5753	4958	5194	8006	8224	6799	5802	5158	9455	6374	7895	6799	5766	5005	7826	4635	4143	5005	12166	7321	7748	11102
TCA-3	7808	7965	9178	6747	7876	7840	7486	8292	5008	5118	4872	4689	5647	6785	6749	6489	5228	5388	8930	6565	8989	6489	5271	4758	8251	4585	4049	4758	11028	7016	6706	10061
TCCR / WSX-1	8335	7193	8966	7676	6319	6310	6066	8356	4673	4804	5404	4913	5015	4754	4468	6425	5317	5087	5714	5108	9135	6425	5116	4420	7362	4350	4029	4420	11021	6713	6763	10552
TCCR / WSX-1	7474	7131	8405	8312	6235	6416	6172	7349	4537	4844	4939	4979	5250	4760	4147	6011	5019	5131	7397	5793	7975	6011	4857	4568	6688	4656	4465	4568	8900	9177	6146	8350
TECK	6772	6286	8851	6925	6579	8214	7172	9162	4661	5038	4799	4916	5606	4538	4258	6395	5141	5121	7908	5753	8604	6395	4903	4095	7085	4181	4015	4095	8847	6365	6295	8468
TECK	6837	6371	7697	7349	6696	7663	6987	8408	4714	4969	4841	5120	5148	4251	4135	5835	5228	4915	8508	5957	7497	5835	7010	4055	6640	4248	3897	4055	9153	7520	5983	8160
TFPI	7035	5869	8737	6661	6513	7637	8019	7034	4626	5471	5163	4655	4695	4490	6207	5917	5228	5218	8257	6077	7905	5917	5241	4348	7646	4575	4364	4348	11003	6385	7577	9135
TFPI	6526	6143	7402	5572	6892	7775	7562	7022	4706	4629	5042	4634	5092	4378	5383	5908	5204	5165	9619	6498	7999	5908	5292	4512	7373	4594	4053	4512	10297	6369	6775	9063
TGF-beta 1	9966	9146	11930	9930	9446	9651	9443	9946	6557	7256	7339	6734	6926	5265	4906	6668	7156	7521	9977	7845	7670	6668	5714	8154	7677	9147	8379	8154	23919	12939	11562	13631
TGF-beta 1	8135	7281	9476	8041	7151	6891	6509	7514	5354	5664	5859	5259	5653	5440	5518	6746	5632	5790	7560	6262	7896	6746	5448	7031	7668	10969	8603	7031	10123	8732	114325	18309
TGF-beta 2	7736	7384	9271	8131	6824	7754	6787	7936	5079	5340	5048	5076	4785	5238	4847	6514	6001	5529	6835	5814	7271	6514	5670	4797	7389	4536	4318	4797	10424	7214	7497	11307
TGF-beta 2	7843	7497	9759	7933	7463	9073	7949	10902	4944	4970	5038	5399	5082	4778	4493	6779	5743	5402	7235	5837	8446	6779	5983	4852	7662	4296	4222	4852	9549	7042	7611	13026
TGF-beta 3	15182	15933	17987	11838	19222	7772	9551	20643	9152	9416	9444	9404	8561	7297	13130	21328	13459	22919	17678	12751	19632	21328	9192	23816	224374	259238	17359	23816	26174	302644	45860	62353
TGF-beta 3	14209	12958	17147	13359	15199	7266	8864	47450	9803	11492	12047	9066	6982	11350	12841	16255	35289	84007	16625	12514	147508	16255	8366	444528	60264	43210	17502	444528	29578	21951	108456	109111
TGF-beta RI / ALK-5	6325	5914	7732	5770	7531	7391	6795	8494	5055	5229	5326	5135	5204	4172	4423	6807	5730	6121	8704	6920	7765	6807	5842	4332	7939	5456	4025	4332	8628	6478	6755	9959
TGF-beta RI / ALK-5	6425	5862	7650	6512	6746	7664	6930	8654	4874	5006	5107	4863	4917	4282	4513	6686	5164	5334	7216	7113	7619	6686	5533	4568	7556	4784	4028	4568	8848	7293	6598	10422
TGF-beta RII	7969	6976	9079	7061	6846	9942	10085	11128	4897	5472	5452	5223	5364	4517	5370	6478	5961	5537	8399	7436	8379	6478	6487	5099	7550	5375	4888	5099	11429	7520	7480	11335
TGF-beta RII	7580	6965	9406	6861	6843	10353	11409	11495	4840	5418	5560	5346	4782	4258	5084	6508	5677	5502	7569	6253	8179	6508	6079	5526	7896	6336	4931	5526	12090	7675	7895	11858
Thrombospondin	9801	9347	13230	9834	224158	221922	150917	314089	6335	6104	7156	6256	4580	7197	7334	8810	7893	8470	9381	8166	8877	8810	5141	29188	7947	23968	7913	29188	15709	10763	9092	27111
Thrombospondin	10159	10922	13634	9464	43443	125710	369067	17299	6507	6938	8290	6567	5177	5673	5148	7222	7181	7449	11323	11795	7834	7222	5384	22469	8325	77565	9304	22469	15735	11027	23914	23135
Thymus Chemokine-1	7614	7365	9264	7595	7415	9123	9188	9830	5414	6188	10066	7404	5754	4868	5019	6942	6118	6366	7218	9704	7975	6942	5382	5221	7732	5049	5039	5221	11796	8249	7101	9617
Thymus Chemokine-1	7419	6995	11427	8219	7952	8161	7775	9730	5034	6155	7119	4979	5805	4859	5191	7209	5925	5964	9135	8611	8282	7209	5618	4856	7677	4795	4488	4856	10944	7113	7196	9644
Tie-2	6253	5819	9001	7880	6876	7615	7339	10387	4803	5369	4925	4926	5170	5006	6485	6845	5653	5552	13393	8137	8220	6845	5575	5069	8303	6113	4767	5069	9419	5877	6232	8581
Tie-2	5897	5607	7466	8374	6512	7753	6756	7863	4806	4953	4952	5222	5030	4982	5274	6783	5540	5785	8623	7514	8413	6783	5652	5247	12251	4617	4416	5247	10145	6265	6465	9539
TIMP-1	5829	6192	7590	7849	6855	6720	6684	7814	5357	5375	5189	4983	4952	4857	4591	7204	5656	5261	7106	7017	8249	7204	4633	5316	8141	4748	4167	5316	8836	6431	6263	9039
TIMP-1	5431	6295	7045	7106	6339	6716	7329	7480	5070	5601	4939	4891	4856	5018	4943	6866	5907	5831	9277	9353	7976	6866	5655	4328	13978	4770	4304	4328	12794	6908	6275	8217
TIMP-2	7596	6231	7326	8474	8606	9676	9588	7977	5060	5546	9271	5511	7582	7797	9672	6677	5920	6026	7199	6830	9349	6677	5958	32215	13044	29975	45377	32215	204746	153118	49307	13591
TIMP-2	9639	6106	7235	8307	10095	7804	10389	10670	5018	5598	6336	4984	5845	8326	8560	7433	5897	6136	6055	6696	13984	7433	5650	34793	12352	35586	43633	34793	143981	133927	48529	13714
TIMP-4	5849	5827	6728	7212	7084	6635	7411	6441	4731	4989	4813	4835	5614	4731	4110	6497	5252	5239	6410	5567	7836	6497	5182	4903	7078	4395	3873	4903	8237	6138	6521	9241
TIMP-4	5626	5777	6496	6726	6423	6236	6159	7083	4687	4889	5264	4656	5181	4213	4923	6304	5232	5036	6851	7580	8500	6304	5516	4502	7180	4306	4112	4502	8285	6023	6130	9093
TL1A / TNFSF15	5469	4816	5821	5341	4463	4486	4357	4574	2972	3343	3415	3156	3545	3273	3379	4661	3541	3280	4275	3624	5430	4661	3589	3055	5115	3429	3173	3055	5700	4178	4048	5943
TL1A / TNFSF15	6124	5929	7744	5326	7359	8358	7444	7005	4900	4744	4681	4858	4890	4367	34241	6491	5592	5140	9496	6466	8148	6491	4416	4631	6802	4192	4308	4631	8853	6375	7498	9442
TLR1	6920	5575	6549	5321	6633	7106	6300	7432	4938	5854	5616	5052	5234	4556	5363	6068	5874	5620	6211	6052	8214	6068	5181	4414	6642	4234	3792	4414	12703	7363	7714	18795
TLR1	7769	6315	8438	6926	6915	8881	7988	7435	4890	5184	4840	5322	5409	5078	4804	6203	5260	5151	7705	6061	11081	6203	5356	4473	7420	3750	3758	4473	9652	7203	7239	11880
TLR2	10246	7669	11019	8127	8150	9855	8963	10466	6271	6213	7028	7326	6782	6047	7061	7823	6447	6627	10535	8072	10739	7823	7082	5940	10041	6126	5738	5940	11777	8383	8635	13478
TLR2	10298	7709	9779	7455	10916	10213	9296	10773	6200	6509	7131	6819	6741	5861	7532	8180	6870	6917	9005	7420	11371	8180	7585	6203	8990	5975	5696	6203	10985	6849	7398	12769
TLR3	6095	5554	7080	4973	7072	9344	8000	10895	4797	4986	4765	4735	5028	4407	4165	6309	5200	5024	9412	7030	7739	6309	5230	4604	7621	4613	4273	4604	9051	6010	6080	11925
TLR3	7048	5743	7446	5128	6725	6993	6956	9342	4861	5021	5236	4879	5350	4471	4392	6493	5403	5381	7900	6103	7238	6493	5221	4592	8297	4660	4468	4592	8667	5722	6264	8593
TLR4	7641	6860	8526	7012	7626	7975	7463	9048	5115	5529	5562	5337	5746	5133	5470	6752	5313	5722	9086	7094	7962	6752	5772	5250	7836	5889	5309	5250	9424	7122	6661	9530
TLR4	7807	7203	7968	6428	7271	8715	7631	9689	5005	6680	5371	5034	5419	5405	5745	7100	5530	5713	9813	7086	8057	7100	6538	5656	8110	7029	5990	5656	9608	7250	7246	10311
TMEFF1 / Tomoregulin-1	5969	6344	6806	7119	6717	7381	7305	6834	5301	5295	5306	5200	5284	5153	5073	6517	5908	5578	9207	6468	7659	6517	5553	4429	7853	4692	4572	4429	9812	6781	8627	8508
TMEFF1 / Tomoregulin-1	7133	6872	7580	6625	6977	7111	7239	7861	4936	5247	5724	5006	5156	4426	4454	6314	5330	5367	9630	6624	7820	6314	6131	4708	7384	5476	4305	4708	9764	13071	7357	17338
TNF RI / TNFRSF1A	6069	5763	8645	5292	6366	7171	7650	7436	5016	5167	5482	5080	4775	4691	4350	6535	5444	5329	8435	6660	7909	6535	6231	4063	7275	4359	4042	4063	9035	6037	5759	8230
TNF RI / TNFRSF1A	7384	6522	9772	7628	6376	6147	5661	6926	4697	6969	5221	4702	4710	4202	4282	6005	5241	5211	7496	6489	7409	6005	5594	4251	7247	4690	3639	4251	9917	6010	5895	8303
TNF RII	7144	6462	8749	6184	6763	8114	9532	9211	4594	4927	5516	4715	5130	3911	4520	6580	4896	4719	7012	5970	7438	6580	5446	4623	7754	4453	3719	4623	8617	6290	5445	8202
TNF RII	6328	5902	8317	5753	6810	8814	8786	9954	4746	4768	4879	4991	4693	4321	4078	6346	5099	4935	8829	6673	7895	6346	5452	4701	7158	4083	3920	4701	10060	6561	5427	8255
TNF-alpha	7407	7379	10185	7895	7887	8856	8469	8095	5739	6292	6817	6047	6134	6268	5836	6972	6448	6339	8482	7726	8095	6972	5988	6523	7964	7430	6611	6523	12156	8119	8508	10944
TNF-alpha	7408	7394	10925	7736	7660	9051	7818	8268	5833	6761	6634	8810	6052	6139	5731	6935	6668	6470	8350	8356	8812	6935	5697	6684	7974	7449	6816	6684	12408	8480	7532	11578
TNF-beta / TNFSF1B	9783	8902	12920	9173	9656	12154	10818	10835	14963	9797	10668	16253	6919	6679	7263	8918	6981	7716	9374	11316	11513	8918	7017	13004	9965	14562	13220	13004	17330	10597	9938	16587
TNF-beta / TNFSF1B	9660	8713	15754	9586	9368	10934	11335	13592	14651	10371	13384	29126	7004	6485	11997	9644	7571	6995	11399	20338	10750	9644	6793	11981	10280	11945	12647	11981	19307	12309	10954	19761
TPO	6673	6041	8658	7885	7045	7761	27409	8494	5051	6648	5878	5384	5415	4986	5300	21874	5777	5313	9024	7457	8181	21874	5356	4873	7672	4811	4704	4873	12049	8072	8472	11217
TPO	6762	6257	8532	8835	7384	9047	10002	9865	5103	5861	5643	5014	5507	4825	5118	7077	6278	5626	7700	8310	8470	7077	5754	5395	8841	5206	4670	5395	12103	9576	7580	10989
TRAIL / TNFSF10	7453	7806	9533	11391	10148	8689	7971	9836	6427	7103	6900	6809	10364	6114	5952	9565	7517	7402	12366	11011	10986	9565	6488	6328	10099	5468	5469	6328	17517	8589	10299	38581
TRAIL / TNFSF10	7623	8400	12930	10531	8804	10751	9413	9471	6576	6877	6540	6497	7636	6148	5770	9051	7235	7392	13699	10852	10844	9051	6700	5780	10513	5755	5409	5780	19849	8721	10642	16449
TRAIL R2 / TNFRSF10B	8365	8052	9359	13535	10228	12123	11487	13951	6613	6764	8173	6567	7462	6041	6239	8425	7221	7022	11802	8699	10791	8425	7888	6073	10084	5744	5566	6073	17417	10091	10700	15798
TRAIL R2 / TNFRSF10B	8802	8037	9874	10219	9941	12278	11681	13931	6359	6684	10967	7125	7571	6995	7161	9101	7640	6706	11324	8414	12760	9101	7921	5991	10357	6131	6218	5991	13598	8296	9850	16042
TRANCE / TNFSF11	6406	6447	7403	6903	9409	7844	7891	7999	4921	5094	5295	4961	7399	6611	6882	7113	6183	5279	8806	6076	8351	7113	5771	4474	7422	4108	4935	4474	10922	7665	7615	17041
TRANCE / TNFSF11	7024	7407	9559	6607	7478	9455	8243	10040	5019	5422	5554	5256	6174	6751	7141	6874	5428	5211	7405	5670	10041	6874	5413	4442	7544	4384	4687	4442	10209	7223	7795	17365
TREM-1	6289	6026	6861	5824	6433	7075	6642	7680	4740	5141	5221	4934	5636	4664	4662	6519	5536	5310	5567	5194	8379	6519	5342	4436	7563	4473	4304	4436	9364	7336	7213	41890
TREM-1	6016	5963	7499	4673	6265	6125	5471	6405	4767	4891	5357	4944	4859	5658	4639	6376	5217	5001	9484	6650	7945	6376	4911	4358	7015	4821	4902	4358	13141	7416	23726	30320
TROY	7716	7276	9195	6956	6488	6584	6560	7336	4846	5118	5629	5017	5084	4813	5115	6705	5630	5419	7451	6115	8171	6705	5244	4515	7165	4448	4129	4515	16813	10038	18455	57407
TROY	6393	6364	7488	5915	7028	8144	12269	7028	4858	4845	5531	4755	5240	4940	4106	6289	5092	4938	9152	6486	7793	6289	5226	4467	7065	4198	4028	4467	15854	7448	8165	10314
TSLP	5509	5800	6291	6756	6564	7332	6931	8713	5052	4832	5561	4677	4538	4800	3993	5973	5292	5067	8034	6122	7967	5973	4695	4308	7031	4260	4412	4308	8981	6133	6591	11165
TSLP	6466	7079	9697	7522	6715	7384	6512	8065	4888	5892	4993	4768	4824	4647	4779	6163	5135	5489	6669	5647	7807	6163	5075	4545	7271	4582	4461	4545	9441	6494	7206	10714
TSLP R	7531	7018	9118	7343	6744	7188	6942	7682	4938	5103	5419	5057	5118	4392	5945	5907	5487	5450	7989	6267	8009	5907	5594	4687	7088	4875	4592	4687	9517	5896	6494	8566
TSLP R	8413	7339	9851	7690	6830	8340	7158	9201	4931	5165	5221	4883	5272	4783	4492	6354	5781	5593	6916	5688	7993	6354	5280	4828	7131	5261	4807	4828	11516	6351	6688	8641
TWEAK / TNFSF12	8133	7566	8856	7513	7033	7733	6962	8309	5349	5466	5117	5101	5999	5071	5337	6743	5777	5726	8743	6680	8382	6743	5505	5470	7506	6223	5818	5470	9578	7604	8397	8529
TWEAK / TNFSF12	7918	7138	8495	8133	7733	7609	6905	7741	5354	5627	5933	5426	6036	5134	5492	6838	5638	5915	8365	6610	8808	6838	6533	5595	7582	6492	6045	5595	9528	7889	7557	8917
TWEAK R / TNFRSF12	7462	7030	9631	7751	6662	7100	6663	7891	5081	7153	5240	5259	5567	5300	4722	6584	5709	5509	8753	6916	8730	6584	6167	4729	7729	4832	4350	4729	9602	8186	7379	9867
TWEAK R / TNFRSF12	7864	7787	9061	7558	7185	8874	7742	6658	5270	5408	5692	5488	5473	4952	4993	6682	5503	5915	8332	6397	8114	6682	5869	4792	6516	4141	4245	4792	10316	7670	11363	12165
Ubiqultin	7645	7474	7811	7045	7023	7669	7256	8095	5151	5991	5669	5264	5126	4896	5162	6876	5487	5398	9483	6798	8070	6876	5525	5684	8136	5602	5088	5684	11461	8826	9057	17543
Ubiqultin	7136	7016	7612	6519	7517	7915	7974	10179	5229	5384	5154	5167	5315	4483	4405	8274	5691	5302	10085	6768	8356	8274	4997	5255	8600	5636	6134	5255	21552	8694	11260	18758
uPAR	7000	7088	9851	7166	7272	9900	11477	10193	5624	6392	6912	5222	5285	5497	3972	7304	5706	5879	7562	16719	8533	7304	5671	4822	8251	6596	3668	4822	12195	9338	10294	12675
uPAR	7638	7283	8770	6954	7087	10896	45218	9184	5244	5608	6491	5278	5731	5580	5839	7465	5061	5542	8814	6373	8459	7465	5823	5167	8067	27929	5216	5167	11478	7464	7459	11692
Urokinase	7784	6466	10202	7008	6309	8997	6327	8121	4758	5001	5087	5005	5090	4361	4832	7921	5382	5408	7920	8558	8188	7921	5439	4907	7078	5238	5187	4907	10245	6491	5974	9058
Urokinase	7314	6810	9596	6955	6108	9221	7680	8728	4762	5319	5279	4680	5210	4365	5160	7227	5315	5956	9204	10930	7951	7227	6100	4712	7316	4912	4977	4712	9756	8699	6097	8833
VCAM-1	18201	17624	28119	15602	18262	30802	32696	37346	8202	12086	8700	8570	9420	9221	15752	10685	20278	23040	19267	22714	21318	10685	8751	18849	12259	16266	17634	18849	43998	33032	30081	49378
VCAM-1	19048	15597	37026	16476	19258	31003	34393	36117	8333	8869	8850	8750	10546	7665	17009	15152	19823	16217	15930	20612	28101	15152	8435	18094	18989	24976	21512	18094	45871	30653	33090	50756
VE-Cadherin	9257	8566	12435	10427	8588	10250	9494	10923	19339	15711	23408	51284	7012	5802	6272	8752	7604	7114	11868	9878	10590	8752	6616	6457	9790	6237	5470	6457	14128	8091	8960	12108
VE-Cadherin	8221	8295	10377	11012	9097	10595	9212	10776	18330	17455	29451	70460	6626	5876	6103	8868	7448	8420	13233	10116	10299	8868	7598	6090	10467	6210	6100	6090	13903	9027	8747	12467
VEGF	6147	6235	7790	8236	7007	8720	7985	6813	4898	5186	5174	4915	5067	4506	4345	7031	5373	5387	9337	7469	8307	7031	5507	4846	7944	4913	4890	4846	9828	6738	6030	8986
VEGF	5969	6827	7926	8704	6242	6949	6468	6835	5017	5470	5084	4905	5299	4515	4309	6734	5501	5972	8787	8720	7956	6734	6827	4530	8098	4853	4495	4530	9555	6133	6242	8480
VEGF R1	5733	5614	7336	7572	7519	7924	6814	9512	4919	5415	5752	4877	5099	4777	4863	6448	5636	4917	8488	6538	8529	6448	5263	4160	7524	4724	4238	4160	10214	6321	6881	9203
VEGF R1	5423	5368	6872	5366	6820	6995	6434	8476	4831	5496	6116	4779	4910	4868	4384	6646	5266	4805	7351	6083	8362	6646	5646	3959	7401	4467	4041	3959	8897	6139	6086	8356
VEGF R2	6310	6049	8386	6495	6650	7662	7498	9001	4695	5476	5590	4846	5031	4597	4351	6436	5209	5438	7842	5891	8013	6436	5365	4838	7402	4627	4042	4838	11162	6435	6364	9872
VEGF R2	7432	6888	11527	7333	7038	8381	8641	8835	4711	5048	5230	5123	4997	4340	4667	6371	5303	5227	8792	6480	8202	6371	5102	4479	7434	4721	4008	4479	8808	6857	6430	8310
VEGF R3	6469	5886	6644	5325	7070	9215	9213	10476	4692	4928	5151	4955	5070	4624	16072	6859	17764	5217	8953	6530	7773	6859	5378	4556	6912	4359	4292	4556	10975	7844	6431	8950
VEGF R3	6644	5854	7274	4997	7081	9465	7858	10058	4796	4927	5128	4774	5132	4016	5143	6085	5783	5184	8257	6346	8807	6085	5197	5020	6720	4317	4192	5020	10248	6314	6721	9435
VEGF-B	6529	6694	8379	6447	6939	7381	6736	7860	4911	5048	5293	5147	4867	4587	5108	6177	5771	6070	6765	5930	8495	6177	5337	5013	7215	4663	4545	5013	11210	7367	6834	10348
VEGF-B	7042	7338	9093	5830	7018	8967	7761	7466	4699	4893	5477	5156	5092	4152	4850	6298	5278	5166	7471	6343	8663	6298	5614	4521	7312	4112	3947	4521	10207	9094	7168	11551
VEGFC	8336	7788	10054	8512	8580	9702	8576	10287	6439	6484	6827	5961	4739	5064	4536	6142	7012	6938	10722	7805	9273	6142	5177	5823	7424	6129	6106	5823	29282	16686	24416	52109
VEGFC	9124	8067	11307	7203	9111	9420	8781	9464	5912	6318	6841	6266	4984	4328	4252	6539	7342	6867	9622	8195	7597	6539	5337	5981	6791	7053	6208	5981	16920	17343	112541	94657
VEGF-D	7561	8996	10389	6099	8108	7369	8142	9104	5139	5664	5849	5011	5339	4607	4020	7000	5353	5466	7868	6203	7810	7000	5472	4649	7603	4786	4488	4649	8932	7336	6762	8747
VEGF-D	7071	7198	8008	6100	6839	7418	6747	7655	5204	5844	6467	7027	5541	5252	4710	6883	5407	5544	8706	6153	8357	6883	5564	4958	7489	4593	4426	4958	9377	7364	7439	8699
WIF-1	8268	8046	9535	7535	12402	12381	10655	16630	4880	5197	5136	4966	6315	5215	5341	6679	5700	5746	8246	7262	8737	6679	6091	10252	8407	9261	12780	10252	15063	12015	17753	14729
WIF-1	7954	7555	9661	8035	13797	12052	12193	16446	4923	5413	5321	5031	6182	5310	0	6541	6118	6067	8182	7295	8924	6541	6121	11639	8330	11309	16229	11639	16775	12653	15470	14931
WISP-1 / CCN4	8204	7692	9707	7661	7361	9039	7099	8017	5344	5999	5456	5593	4943	4559	4886	6858	6279	5765	7546	6176	9663	6858	5474	4827	7984	4503	4274	4827	11522	7164	7548	12055
WISP-1 / CCN4	8013	7686	10416	7407	7607	8280	7810	9779	5361	5515	5667	5501	6105	5352	4744	7166	39813	5702	8010	6531	8285	7166	5911	5149	7767	4976	4746	5149	9931	7020	9056	10595
Neg	7863	7318	10456	7012	6880	9449	8139	10610	5298	4906	5222	5025	5118	4580	4305	6792	5449	6377	11001	7250	8224	6792	5753	5083	7701	4174	4519	5083	13866	7015	7001	12042
Neg	7913	7311	9315	6899	7064	9695	8175	10548	4793	5165	5342	4922	5094	4439	4284	7091	5454	5090	10710	6968	7987	7091	5663	5294	10800	4628	4324	5294	14298	6593	7186	11778
Neg	8249	7801	9988	7170	6978	9653	8155	10727	5300	5660	5022	5038	4760	4401	3984	6418	5120	5266	10686	7186	7716	6418	5328	4941	12334	4016	4021	4941	14339	6182	6630	11834
Neg	8103	7106	9013	7141	7270	9948	8011	10439	4700	4689	5043	5153	5872	4270	4320	7101	5292	4896	10282	6903	7828	7101	5003	5052	20924	4040	3790	5052	14705	6613	6824	12972
Neg	10843	7254	10993	6846	6950	10357	8469	10876	4641	4846	4610	4988	4961	4135	4554	6871	5081	5035	10832	7055	7713	6871	4866	4783	7529	4115	4113	4783	15030	6855	6648	12280
Neg	8170	7355	10305	7231	7004	9639	8203	10425	4721	5045	4994	4851	4607	4594	6212	6672	5159	5193	10644	8550	8551	6672	5160	5104	7808	4153	3943	5104	15670	7004	7094	12339
Positive 3	913716	890336	928167	816174	886489	786035	883181	830052	783464	801198	797239	738303	786826	857387	819492	634349	810500	835270	866053	893064	706983	634349	826551	417578	760907	394454	410963	417578	760424	758049	863478	863496
Positive 3	927639	974499	1001069	847336	995987	861323	888302	875566	822771	869053	800564	803660	764340	863342	885979	764928	844709	843450	885233	857288	753317	764928	875546	486757	776992	448222	466819	486757	805520	839692	922431	873082
Positive 2	954098	869013	894642	876911	883051	764741	824443	848386	692044	762264	772408	739099	747930	821969	822996	749308	799362	735527	848382	950759	718644	749308	830745	394726	751739	380717	412034	394726	698503	700294	838656	842098
Positive 2	913931	895359	947788	851809	903835	793372	875100	841319	714205	757464	781670	722579	811417	820703	802175	773796	832759	798783	859259	925768	687054	773796	806408	375555	764972	391482	415166	375555	706170	752242	867365	805835
Positive 1	1878909	1896974	1988744	1856352	1973034	1683376	1835669	1795659	1660357	1631367	1651385	1571068	1639513	1736525	1894142	1503631	1681259	1683087	1741175	1906679	1485237	1503631	1760703	1048499	1598409	1093373	1059426	1048499	1640373	1735368	1927283	1829125
Positive 1	1759892	811555	2002431	1909158	2026359	1688817	1854258	1822509	959943	1551459	1690440	1564882	1732178	1845887	1820890	1480471	1711089	1641383	1727884	1867144	1520695	1480471	1871353	1057090	1626500	1069657	1076830	1057090	1665035	1799563	1888140	1863908

## Sheet: 4 month antibody array
Normalized BONCAT Array Data of Serum Samples
Legend: M_exp: Male OT+ALk5i F_exp: Female OT+Alk5i M_con: Old Male Control F_con: Old Female Control
ID	M_exp	M_Con	F_exp	M_exp	F_con	F_Con	F_exp	F_con	M_Con	F_exp	M_Con	M_exp	F_con	F_exp	M_Con
6Ckine	0.0677092	0.0696755	0.0559706	0.0615963	0.136553	0.0665731	0.0944049	0.037087	0.157743	0.0758139	0.0929153	0.0758389	0.0796559	0.10772	0.0814078
Activin A	0.0823901	0.0869498	0.0601826	0.0639735	0.225111	0.149498	0.301051	0.162195	0.280962	0.163741	0.271592	0.254921	0.399661	0.204484	0.267069
Activin C	0.053753	0.0552459	0.0461304	0.0409335	0.0966056	0.0481492	0.0990094	0.0241517	0.202072	0.0844434	0.0960107	0.0717954	0.0555703	0.0972909	0.0610053
Activin RIB / ALK-4	0.0568266	0.0801378	0.0606644	0.0620511	0.129717	0.0801399	0.0976336	0.0390784	0.205917	0.113135	0.12887	0.0729125	0.0745702	0.100356	0.0992764
Adiponectin / Acrp30	0.0611884	0.0595085	0.0374457	0.0435533	0.230748	0.106063	0.228029	0.0692588	0.221994	0.13272	0.128899	0.131822	0.227253	0.112332	0.112701
AgRP	0.102538	0.098893	0.0687274	0.0831009	0.381323	0.289863	0.388669	0.128619	0.704216	0.245297	0.437362	0.187556	0.224955	0.129504	0.227409
ALCAM	0.0566655	0.050361	0.0333725	0.0304369	0.133272	0.0662055	0.118777	0.0348504	0.145909	0.0808133	0.0863733	0.122596	0.0853808	0.0673856	0.0761494
Angiopoietin-like 2	0.0640784	0.0600101	0.053011	0.0395175	0.23749	0.27281	0.423723	0.142542	0.514494	0.181255	0.37482	0.229975	0.230699	0.168125	0.432199
Angiopoietin-like 3	0.056278	0.0597084	0.036956	0.042151	0.123465	0.0614276	0.118834	0.0523184	0.134932	0.0451632	0.0873594	0.0501702	0.0816106	0.0652366	0.078138
AR (Amphiregulin)	0.0367028	0.0351193	0.0162242	0.020958	0.0770317	0.0322852	0.104923	0.0195795	0.10065	0.0693534	0.0673463	0.0269985	0.0714583	0.0486395	0.0596621
Artemin	0.0570134	0.0674706	0.0443962	0.0504802	0.226641	0.265463	0.397835	0.09052	0.250417	0.157705	0.235211	0.273163	0.343384	0.203447	0.189924
Axl	0.060394	0.0771524	0.0467025	0.0464105	0.257625	0.136266	0.269931	0.111808	0.232721	0.166572	0.18604	0.422654	0.433585	0.191024	0.204813
b FGF	0.13314	0.120094	0.121784	0.123559	0.391358	0.235929	0.425936	0.173094	0.538236	0.236615	0.458776	0.242752	0.327508	0.276237	0.350195
B7-1/CD80	0.112464	0.0824332	0.0900257	0.0954834	0.342921	0.138116	0.278026	0.128276	0.218229	0.117125	0.161044	0.308143	0.31119	0.166359	0.230219
BAFF R / TNFRSF13C	0.169175	0.199846	0.162179	0.167963	0.294152	0.193603	0.244464	0.161874	0.29758	0.204412	0.252683	0.200749	0.311385	0.23895	0.288278
BCMA / TNFRSF17	0.0682868	0.088198	0.0601465	0.0613764	0.158092	0.0899903	0.12836	0.0527444	0.188811	0.0950743	0.118207	0.100121	0.121527	0.119401	0.131017
beta-Catenin	0.0598776	0.0693461	0.0605313	0.0656522	0.152806	0.0667698	0.123114	0.0486935	0.136243	0.0778869	0.115687	0.0741095	0.0855799	0.0885105	0.0927444
BLC	0.0752563	0.0800096	0.0556208	0.0639346	0.206724	0.103867	0.254563	0.074579	0.194433	0.144268	0.185872	0.166273	0.276806	0.14877	0.211292
BTC (Betacellulin)	0.103665	0.0965373	0.0682039	0.0683197	0.233859	0.102313	0.185193	0.0699808	0.184903	0.135167	0.165277	0.169088	0.227307	0.139167	0.168038
Cardiotrophin-1	0.104698	0.0811309	0.0639095	0.0759565	0.252275	0.218603	0.263349	0.102019	0.217207	0.135203	0.201109	0.277126	0.344297	0.148386	0.188668
CCL1 / I-309 / TCA-3	0.042588	0.0268454	0.0176842	0.0302346	0.0963572	0.0624553	0.0824951	0.0382066	0.134702	0.0773036	0.0670637	0.0359064	0.0640737	0.05671	0.0664085
CCL28	0.03135	0.0390702	0.0359665	0.0408946	0.0981867	0.116191	0.202643	0.0678222	0.308936	0.126774	0.19533	0.112182	0.142697	0.109328	0.277422
CCL4 / MIP-1 beta	0.0679647	0.0590912	0.0438806	0.0421372	0.206879	0.111409	0.738763	0.101156	0.195303	0.133465	0.125009	0.327032	0.319539	0.125732	0.139282
CCL7 / MCP-3 / MARC	0.05117	0.0473617	0.0269365	0.0314019	0.107597	0.0499203	0.14803	0.0334436	0.126596	0.0957486	0.0834756	0.0343548	0.0741457	0.0528385	0.0752601
CCL8 / MCP-2	0.0550971	0.083283	0.0433503	0.0481243	0.17355	0.154791	0.309103	0.0858078	0.189812	0.100564	0.155878	0.251047	0.147764	0.103858	0.130427
CCR10	0.0485688	0.0526576	0.0332946	0.0356525	0.141829	0.0661396	0.113775	0.0518193	0.112036	0.0806655	0.0832489	0.107484	0.130551	0.0849476	0.0748562
CCR3	0.053301	0.0592986	0.0394158	0.0463024	0.192365	0.0917614	0.193519	0.0665813	0.142104	0.107129	0.121765	0.224554	0.247555	0.133063	0.130283
CCR4	0.0410882	0.0467935	0.0278764	0.0434251	0.133913	0.063624	0.125701	0.0226507	0.148456	0.0896463	0.0803	0.0243389	0.0664493	0.057838	0.0562072
CCR6	0.0771018	0.0845224	0.0591412	0.0703552	0.141647	0.101184	0.17305	0.0693938	0.203213	0.0984235	0.151992	0.157668	0.183401	0.117542	0.11824
CCR7	0.0840058	0.0708269	0.0571124	0.0719647	0.172319	0.086066	0.13452	0.0498911	0.172052	0.0864135	0.112152	0.111043	0.101679	0.0954005	0.121664
CCR9	0.110306	0.109164	0.0730579	0.0886985	0.439997	0.209339	0.428242	0.132069	0.372666	0.230103	0.345627	0.220064	0.212258	0.139829	0.24691
CD11b	0.0968477	0.0961111	0.0694947	0.0822892	0.17638	0.103291	0.261977	0.0852877	0.327513	0.212711	0.247173	0.147745	0.174347	0.14082	0.200348
CD14	0.059373	0.0548185	0.0373916	0.0480276	0.154064	0.0849085	0.22876	0.12832	0.0943542	0.119314	0.0781104	0.327395	0.330059	0.108108	0.117251
CD27 / TNFRSF7	0.0550219	0.0591125	0.0373904	0.0439214	0.104376	0.0613627	0.094391	0.038557	0.205308	0.0920872	0.0996956	0.0684121	0.0552549	0.0785746	0.0683874
CD27 Ligand / TNFSF7	0.107911	0.100442	0.0676668	0.0618714	0.323703	0.157677	0.305484	0.116093	0.345418	0.183167	0.267979	0.317135	0.325511	0.247575	0.265353
CD30	0.0738135	0.06713	0.0457073	0.0500593	0.163204	0.0777725	0.152226	0.055277	0.170461	0.0887732	0.110064	0.0682547	0.0813983	0.132889	0.0918845
CD30 L	0.0420254	0.0469556	0.0316112	0.0315916	0.117337	0.0726805	0.26082	0.092177	0.123274	0.110188	0.0956932	0.237166	0.339095	0.108686	0.101573
CD40	0.0502897	0.0650081	0.0330893	0.0422629	0.148514	0.102506	0.145853	0.0516695	0.159009	0.0747696	0.1063	0.141775	0.176755	0.113163	0.0971876
CD40 Ligand / TNFSF5	0.0665798	0.0780901	0.0433108	0.0533739	0.200736	0.121457	0.162664	0.0510577	0.142753	0.0766791	0.16467	0.119446	0.115166	0.0852609	0.17219
Cerberus 1	0.0857546	0.0784698	0.0507261	0.0540587	0.236098	0.139459	0.323893	0.0912024	0.231046	0.175311	0.190239	0.319156	0.35202	0.179866	0.202606
Chordin-Like 2	0.0550992	0.0559599	0.0381554	0.0504689	0.150609	0.0678459	0.123887	0.0433993	0.111606	0.0718208	0.0877338	0.0909623	0.087483	0.0740492	0.0785974
Coagulation Factor III / Tissue Factor	0.0365074	0.0253646	0.0164826	0.0136642	0.0681782	0.0414014	0.102605	0.0359762	0.114444	0.0701227	0.077393	0.0381397	0.0657717	0.0653117	0.0600104
Common gamma Chain / IL-2 R gamma	0.124217	0.12036	0.0786544	0.0911272	0.621196	0.271352	0.529315	0.153272	0.445121	0.254723	0.443007	0.215041	0.206483	0.219416	0.262226
CRG-2	0.0807454	0.0748997	0.0503515	0.0593836	0.208214	0.10435	0.212348	0.0829359	0.164985	0.102198	0.164649	0.211725	0.246294	0.119488	0.174896
Cripto	0.0762504	0.117099	0.0644578	0.0704306	0.33241	0.131878	0.219277	0.0811972	0.210326	0.113422	0.127456	0.133965	0.153412	0.0934433	0.112966
Crossveinless-2	0.0476842	0.0515527	0.0306227	0.0419927	0.13073	0.0644756	0.0958376	0.0359019	0.132111	0.0687084	0.0764941	0.0517064	0.0699821	0.055028	0.0654441
CRP	0.0951482	0.0975504	0.0706298	0.0733179	0.441612	0.306385	0.556165	0.181677	0.539394	0.308994	0.534211	0.386212	0.275154	0.176454	0.448188
Cryptic	0.0873993	0.0809134	0.0587564	0.0656396	0.224798	0.0938219	0.173049	0.061001	0.172363	0.106598	0.123351	0.147367	0.190666	0.154106	0.136019
Csk	0.19299	0.135963	0.0665836	0.105078	0.241716	0.101312	0.245694	0.0840133	0.218854	0.10937	0.11675	0.14385	0.352433	0.230972	0.297441
CTACK	0.098312	0.0872804	0.0650378	0.0771778	0.369525	0.339909	0.547293	0.172295	0.635502	0.288647	0.469931	0.243047	0.27151	0.169123	0.471713
CTLA-4 / CD152	0.0635331	0.0579284	0.0403151	0.0378652	0.108792	0.0738276	0.133622	0.0645367	0.13568	0.071028	0.107132	0.186834	0.1974	0.119584	0.130069
CXCL14 / BRAK	0.101862	0.0860598	0.0586797	0.0713566	0.264161	0.222436	0.643292	0.168829	0.536568	0.35877	0.658222	0.273015	0.278768	0.235052	0.468454
CXCL16	0.0392041	0.063257	0.046522	0.0445873	0.202929	0.0983795	0.176035	0.0580201	0.171789	0.104942	0.112816	0.144991	0.167473	0.104668	0.126165
CXCR2 / IL-8 RB	0.056716	0.056396	0.0516976	0.0470098	0.206889	0.084715	0.196979	0.0813173	0.173852	0.11264	0.127268	0.242235	0.25382	0.138064	0.123268
CXCR3	0.052352	0.0596757	0.0393109	0.0462421	0.139899	0.104198	0.127852	0.045564	0.1471	0.0652036	0.10217	0.0942771	0.0747992	0.07925	0.0684636
CXCR4	0.0689921	0.0765163	0.045168	0.0507793	0.308073	0.167166	0.398629	0.11914	0.344376	0.194138	0.311774	0.158339	0.178921	0.12695	0.213505
CXCR6	0.0837417	0.108444	0.0854752	0.0987352	0.328283	0.302613	0.489822	0.178699	0.233192	0.233498	0.432424	0.132652	0.356027	0.126427	0.168871
DAN	0.0564336	0.0520064	0.0354915	0.0421875	0.159012	0.092059	0.165111	0.0712997	0.133296	0.100544	0.105261	0.207032	0.22141	0.100873	0.0993602
Decorin	0.0516424	0.0551692	0.0365261	0.0392548	0.101597	0.0679468	0.166137	0.0542317	0.121713	0.0841595	0.0803663	0.12636	0.167855	0.0859423	0.0864345
DKK-1	0.034619	0.031499	0.0205186	0.0194176	0.0737208	0.0660336	0.0989126	0.0355885	0.134866	0.068176	0.0706301	0.0284561	0.07186	0.0583419	0.0762277
Dkk-3	0.0827465	0.0901929	0.0585296	0.0642751	0.245538	0.103448	0.220462	0.0779413	0.196149	0.118136	0.162695	0.18182	0.213854	0.108551	0.169532
Dkk-4	0.0480556	0.0510662	0.036085	0.0380511	0.105331	0.0577792	0.123285	0.0240093	0.127502	0.0622782	0.152766	0.0613502	0.0665884	0.0615689	0.0683634
DPPIV / CD26	0.0790309	0.0801881	0.0534194	0.0568066	0.234184	0.0903054	0.178437	0.0729072	0.183076	0.0977247	0.142381	0.1885	0.197905	0.110529	0.152872
DR3 / TNFRSF25	0.0566033	0.0513302	0.0301974	0.0369618	0.112959	0.0616171	0.11497	0.0318299	0.136113	0.0563902	0.0798569	0.0495978	0.104047	0.0664505	0.0694835
Dtk	0.0808227	0.106117	0.0483341	0.0559308	0.261825	0.134139	0.258852	0.0920519	0.35701	0.141017	0.199237	0.179922	0.191386	0.121604	0.180389
E-Selectin	0.0797159	0.0832377	0.0512508	0.0631681	0.21879	0.0956836	0.198084	0.0852988	0.167442	0.102025	0.146323	0.191443	0.265642	0.119643	0.161469
EDAR	0.062948	0.0621244	0.0445677	0.037634	0.149349	0.079904	0.183148	0.0793333	0.135447	0.0950381	0.104181	0.189711	0.214418	0.110574	0.125158
EG-VEGF / PK1	0.0887337	0.0991117	0.0570436	0.0748785	0.277876	0.16308	0.231923	0.082521	0.319089	0.142849	0.228365	0.14233	0.142618	0.127898	0.142465
EGF R	0.0530219	0.0624651	0.0386011	0.050445	0.190714	0.0887494	0.199972	0.0507865	0.256368	0.107557	0.17955	0.110132	0.0931072	0.0807283	0.117767
Endocan	0.0579753	0.0734152	0.0475533	0.0570679	0.255637	0.15026	0.148843	0.0550751	0.241439	0.0906358	0.266871	0.151293	0.137796	0.0803829	0.0909702
Endoglin / CD105	0.104633	0.104069	0.0748915	0.0770547	0.284948	0.120871	0.204638	0.0788565	0.183001	0.117742	0.164333	0.129787	0.154742	0.124672	0.129813
Endostatin	0.0449981	0.0505382	0.0333431	0.0430356	0.124923	0.0818018	0.109232	0.0403354	0.115228	0.0668596	0.0885919	0.0660847	0.0667575	0.0672784	0.0576582
Eotaxin-2	0.0522446	0.0520052	0.0224334	0.0326081	0.109254	0.0700928	0.116463	0.031664	0.129584	0.0738036	0.0841512	0.0454878	0.0828637	0.0592699	0.0671737
Eotaxin	0.0547782	0.0621986	0.0411094	0.0504739	0.180754	0.163237	0.609253	0.109018	0.263121	0.14697	0.254349	0.144116	0.275767	0.129414	0.277206
Epigen	0.0624219	0.0635084	0.0435387	0.0493984	0.149894	0.0634644	0.114222	0.0298088	0.118637	0.0667666	0.080736	0.0712618	0.0773739	0.0585516	0.0664825
Epiregulin	0.0659357	0.0673876	0.0456859	0.057181	0.234978	0.127659	0.177685	0.0594728	0.161972	0.118344	0.114285	0.166341	0.178727	0.0891073	0.111978
Erythropoietin (EPO)	0.0729439	0.0836903	0.0547847	0.0625562	0.244979	0.111657	0.251856	0.0922439	0.192677	0.146544	0.165057	0.260605	0.253133	0.093541	0.135245
FADD	0.0976164	0.080173	0.065655	0.0653946	0.347982	0.138772	0.201908	0.0835638	0.201677	0.105124	0.135621	0.133981	0.167477	0.134036	0.143104
FAM3B	0.0465752	0.0426704	0.0308191	0.0298514	0.0889424	0.0389197	0.0757787	0.0333891	0.175284	0.0678354	0.0871605	0.0774365	0.0693501	0.132023	0.0601432
Fas / TNFRSF6	1.82635	0.788081	0.708384	0.840094	1.27557	1.54577	1.10464	1.87802	0.910014	1.26131	1.25407	1.06345	1.4285	0.675248	0.693615
Fas Ligand	0.0512194	0.0577876	0.051209	0.0442607	0.178733	0.123899	0.218803	0.0674643	0.166844	0.0833844	0.0614427	0.270947	0.28918	0.139285	0.111203
FCrRIIB / CD32b	0.0726755	0.0740035	0.0493225	0.0522104	0.188027	0.0996471	0.131052	0.0511877	0.167028	0.0912015	0.116795	0.105639	0.150301	0.104624	0.224657
FGF R3	0.0775301	0.104326	0.0680786	0.0674791	0.274523	0.131592	0.642135	0.100674	0.357957	0.236871	0.29647	0.184047	0.208361	0.229812	0.237637
FGF R4	0.0609812	0.0793346	0.0528778	0.056025	0.170037	0.0757326	0.139735	0.0516286	0.178282	0.0940153	0.129104	0.0883937	0.109144	0.106779	0.0725704
FGF R5 beta	0.123634	0.12543	0.092561	0.0999716	0.868381	0.333561	0.959384	0.414549	0.578567	0.398662	0.76971	0.326657	0.442437	0.342323	0.459021
FGF-21	0.0488694	0.0495728	0.0350424	0.0532595	0.151496	0.0984598	0.188762	0.0598703	0.207862	0.110316	0.120209	0.142645	0.148916	0.0814407	0.0908515
Fit-3 Ligand	0.0413276	0.0459814	0.0228238	0.0252389	0.123084	0.0535893	0.115097	0.0446104	0.111335	0.0618231	0.0596671	0.0427342	0.0481821	0.0467991	0.0454475
FLRG (Follistatin)	0.0639131	0.0627278	0.0399044	0.0467636	0.173442	0.0907718	0.187225	0.0679919	0.136171	0.104115	0.107074	0.165713	0.153508	0.0737371	0.0888933
Follistatin-like 1	0.0530026	0.0567053	0.0413385	0.0533689	0.220618	0.1233	0.200115	0.0914179	0.256432	0.142015	0.177462	0.123625	0.101732	0.0644433	0.121471
Fractalkine	0.057183	0.0502504	0.039119	0.0457973	0.172078	0.0781813	0.165716	0.0651695	0.138751	0.105414	0.0970293	0.188359	0.191275	0.0768164	0.0915808
Frizzled-1	0.0600097	0.0748696	0.0475702	0.0401294	0.209881	0.0883592	0.191094	0.0967109	0.116055	0.110376	0.0939013	0.294137	0.24074	0.145245	0.157838
Frizzled-6	0.0952535	0.0988615	0.0608901	0.0688914	0.289478	0.20125	0.322096	0.130988	0.290762	0.185349	0.312535	0.195716	0.184827	0.119487	0.172693
Frizzled-7	0.065458	0.0659999	0.040323	0.0386153	0.245559	0.231164	0.28087	0.141355	0.187305	0.161009	0.151297	0.543433	0.333223	0.341892	0.198535
G-CSF	0.0615234	0.0725038	0.0506313	0.050724	0.213857	0.0963746	0.191166	0.0653008	0.179987	0.0990792	0.13379	0.204074	0.257776	0.134552	0.129486
Galectin-3	0.086752	0.0704523	0.0504023	0.0548842	0.230984	0.162711	0.381713	0.124506	0.222919	0.131629	0.19593	0.199902	0.261795	0.149886	0.127631
GDF-1	0.0846553	0.0963902	0.0696244	0.0766225	0.164978	0.115777	0.157936	0.0784714	0.214458	0.111196	0.103908	0.08268	0.0972276	0.105382	0.101521
GDF-3	0.0876806	0.098947	0.0570481	0.0660656	0.182123	0.110355	0.204696	0.0633998	0.153851	0.118873	0.158092	0.15018	0.202367	0.112381	0.108564
GDF-5	0.0799177	0.0844747	0.0582994	0.0612231	0.33096	0.150996	0.353042	0.119681	0.253646	0.160214	0.284311	0.275003	0.30983	0.199478	0.196671
GDF-8	0.0933243	0.136702	0.0742912	0.0751888	0.46011	0.300475	0.722357	0.204223	0.436441	0.324395	0.477672	0.269659	0.355308	0.242265	0.354891
GDF-9	0.0614171	0.0541648	0.0394722	0.045791	0.180248	0.0683381	0.128039	0.0448557	0.124005	0.0807996	0.0859094	0.0649757	0.0752309	0.060417	0.0913642
GFR alpha-2 / GDNF R alpha-2	0.0448918	0.0424165	0.0267582	0.0955463	0.109803	0.0751343	0.131177	0.033217	0.132861	0.0715663	0.0992851	0.048732	0.0676964	0.0659752	0.0653897
GFR alpha-3 / GDNF R alpha-3	0.0383775	0.0415164	0.0275029	0.0315753	0.0735691	0.0657741	0.111691	0.0293147	0.14328	0.0769571	0.0637869	0.0341442	0.0597434	0.054455	0.06409
GFR alpha-4 / GDNF R alpha-4	0.0750083	0.0753686	0.0514291	0.0598963	0.164371	0.0808741	0.137062	0.0622716	0.140323	0.0823704	0.108388	0.0922737	0.0909055	0.0768462	0.139147
GITR	0.0642352	0.0559473	0.0371794	0.0438196	0.165792	0.0899913	0.165999	0.0739239	0.16055	0.114187	0.105188	0.186913	0.164141	0.100913	0.164165
GITR Ligand / TNFSF18	0.0771866	0.0657686	0.0465163	0.0482462	0.185383	0.0872213	0.175313	0.0691671	0.162747	0.100786	0.107318	0.167419	0.133514	0.0814288	0.101663
Glut2	0.0597735	0.0636115	0.04406	0.0432228	0.180505	0.127226	0.283528	0.0765939	0.243933	0.155517	0.232585	0.114592	0.107555	0.0860316	0.160671
GM-CSF	0.0695718	0.0579963	0.0379151	0.0412778	0.15943	0.103242	0.154811	0.0741097	0.14685	0.112389	0.109524	0.209563	0.166856	0.122091	0.102986
Granzyme B	0.067297	0.0558354	0.0315299	0.0396594	0.141568	0.096214	0.489067	0.0729468	0.21316	0.117804	0.160491	0.124978	0.168984	0.0925547	0.20043
Granzyme D	0.0652551	0.0740739	0.0521444	0.0514452	0.192831	0.103068	0.138075	0.0499951	0.197316	0.0917642	0.132638	0.0833178	0.110065	0.125828	0.187243
Granzyme G	0.0859393	0.125677	0.0688741	0.0781554	0.321414	0.137308	0.250612	0.0838003	0.220085	0.155453	0.160893	0.145315	0.178965	0.125878	0.187886
Gremlin	0.0462746	0.0518279	0.0358886	0.0393202	0.14286	0.0645374	0.126884	0.0343117	0.13041	0.068634	0.0940967	0.0424306	0.0788776	0.0649543	0.0836425
Growth Hormone R	0.0470937	0.0503723	0.0342402	0.0347077	0.132712	0.0641275	0.105483	0.0459207	0.115964	0.0840861	0.0705324	0.0436224	0.0674278	0.0612461	0.0715549
HGF R	0.049244	0.0508248	0.0295475	0.0417213	0.103325	0.0435092	0.113284	0.0395205	0.102089	0.058055	0.0699463	0.0500618	0.0865692	0.0631866	0.081041
HGF	0.0698832	0.0820548	0.0553692	0.0459267	0.194843	0.0987244	0.200586	0.076672	0.139977	0.0907806	0.140838	0.157311	0.235232	0.105683	0.174689
HVEM / TNFRSF14	0.0566086	0.0475754	0.0338926	0.0673572	0.100544	0.0643294	0.108371	0.0278979	0.110727	0.0411926	0.0632776	0.0411989	0.0937032	0.0635439	0.0878702
I-TAC	0.0212564	0.0252427	0.0161272	0.0183785	0.0670919	0.0327146	0.0849951	0.0191869	0.0913347	0.0617389	0.059038	0.0267655	0.052691	0.0269821	0.0658229
ICAM-1	0.149278	0.101361	0.0684702	0.0763699	0.335466	0.262434	0.748115	0.232693	0.563761	0.320257	0.549041	0.315185	0.31107	0.186129	0.596509
ICAM-2 / CD102	0.0403024	0.0370338	0.0224943	0.0312549	0.0775151	0.0610075	0.0936848	0.0350783	0.103481	0.0842417	0.0578543	0.0317432	0.0505301	0.0460534	0.0502488
ICAM-5	0.0879855	0.0719407	0.0579	0.0690509	0.19655	0.0884292	0.156364	0.0645168	0.129783	0.0864116	0.124074	0.101332	0.191979	0.0894861	0.0894692
ICK	0.0599474	0.0592194	0.0418902	0.0395853	0.139773	0.0532247	0.0943351	0.0296887	0.110778	0.0507459	0.0766115	0.0430214	0.06366	0.0493185	0.0802421
IFN-alpha / beta R1	0.0438065	0.0287976	0.0328467	0.0344915	0.103346	0.0598768	0.108189	0.0454551	0.138095	0.0827306	0.0679603	0.0385016	0.073016	0.0577535	0.0612926
IFN-alpha / beta R2	0.0823751	0.0857154	0.0619789	0.0623552	0.207444	0.139175	0.211367	0.0963208	0.13736	0.12744	0.156944	0.131968	0.152719	0.0929871	0.107595
IFN-beta	0.039187	0.0353783	0.0232175	0.0461479	0.0648861	0.0222844	0.103089	0.0110517	0.213507	0.0580207	0.117541	0.0906056	0.0478043	0.0620239	0.0630005
IFN-gamma	0.0853703	0.105697	0.0681655	0.0682531	0.239637	0.0931268	0.2474	0.081913	0.179261	0.118923	0.186022	0.140745	0.187635	0.132455	0.171851
IFN-gamma R1	0.0872029	0.0891571	0.0516367	0.0609479	0.329356	0.294808	0.601837	0.152821	0.536461	0.200431	0.275746	0.172181	0.252006	0.178461	0.30662
IGF-I	0.0617317	0.0594117	0.0416747	0.0492438	0.184067	0.0718093	0.148694	0.0402623	0.138649	0.0721829	0.0908943	0.0563019	0.228205	0.0771547	0.102563
IGF-II	0.0679583	0.0598818	0.0529128	0.0613085	0.180825	0.107469	0.223582	0.086318	0.124139	0.104355	0.123547	0.230577	0.181816	0.12381	0.136041
IGFBP-1	0.0628041	0.0669565	0.0436786	0.0523398	0.227683	0.11836	0.29595	0.0919677	0.228218	0.131376	0.252828	0.110291	0.158998	0.147835	0.214259
IGFBP-2	0.0740464	0.0740223	0.0791802	0.0710877	0.340711	0.220484	0.41083	0.159758	0.369537	0.201402	0.353622	0.171086	0.156177	0.151976	0.284903
IGFBP-3	0.0531861	0.0570158	0.0398547	0.044326	0.14472	0.075609	0.126245	0.0505487	0.144329	0.0783909	0.111864	0.0774222	0.0743159	0.0710557	0.0885657
IGFBP-5	0.0535844	0.0545155	0.036762	0.0418306	0.162948	0.0713635	0.179171	0.0498069	0.169562	0.0706443	0.125127	0.0763397	0.092462	0.0708329	0.113834
IGFBP-6	0.0740453	0.0803264	0.126282	0.0802964	0.221153	0.137253	0.247065	0.0916309	0.177272	0.132826	0.235229	0.159388	0.158139	0.121312	0.139236
IGFBP-rp1 / IGFBP-7	0.0489166	0.0498016	0.0263001	0.0401658	0.122293	0.0607634	0.110099	0.0327786	0.126566	0.0709732	0.0707847	0.0458578	0.0834669	0.0538403	0.0759001
IL-1 alpha	0.0691295	0.0710469	0.0487831	0.0567098	0.253747	0.194731	0.449475	0.1369	0.371247	0.20832	0.413738	0.211519	0.316207	0.133392	0.35064
IL-1 beta	0.0806982	0.0603859	0.0423212	0.0458476	0.147179	0.090604	0.179333	0.0769989	0.167125	0.0908491	0.103874	0.13073	0.172238	0.102426	0.178177
IL-1 R4 / ST2	0.0709632	0.0968754	0.0427207	0.0505908	0.232763	0.23342	0.384982	0.138108	0.310035	0.203299	0.376056	0.199402	0.157505	0.140378	0.313465
IL-1 R6 / IL-1 R rp2	0.0637821	0.0543232	0.0346024	0.0521564	0.118658	0.0754165	0.122416	0.040328	0.171887	0.0945722	0.0970025	0.049747	0.0749611	0.0675798	0.0826389
IL-1 R9	0.0434103	0.0426415	0.0277963	0.0318039	0.110925	0.0282641	0.0808421	0.0233207	0.0730813	0.0513869	0.0470018	0.0495099	0.0381413	0.0561358	0.0552221
IL-1 RI	0.0621235	0.0735296	0.0416747	0.0476092	0.297638	0.235985	0.407659	0.130138	0.438624	0.186999	0.238014	0.127448	0.190906	0.13005	0.204414
IL-1 RII	0.0827605	0.0849574	0.0612308	0.0613889	0.273446	0.0958649	0.193553	0.064632	0.296493	0.161635	0.147556	0.142725	0.13246	0.11142	0.232017
IL-10	0.101037	0.123109	0.0785946	0.0921374	0.21709	0.10142	0.174197	0.0786336	0.260436	0.147001	0.182363	0.155524	0.142077	0.139493	0.141916
IL-10 R alpha	0.0624584	0.0515501	0.052536	0.062565	0.157567	0.0855913	0.156382	0.0516769	0.141521	0.0854632	0.101744	0.0724066	0.116094	0.085928	0.0796869
IL-11	0.149807	0.142764	0.0926208	0.101512	0.603245	0.364893	0.744282	0.303712	0.646595	0.372945	0.730952	0.405329	0.263659	0.245688	0.37377
IL-12 p40/p70	0.0625272	0.095954	0.074835	0.0471719	0.148696	0.0814178	0.230706	0.0626481	0.24952	0.165881	0.229357	0.149824	0.108111	0.31158	0.161219
IL-12 p70	0.118399	0.119561	0.0834397	0.0829501	0.19945	0.152538	0.30194	0.105201	0.450467	0.217306	0.335637	0.199869	0.186602	0.192906	0.183122
IL-12 R beta 1	0.0215946	0.0318032	0.00859897	0.0104853	0.0764319	0.0574508	0.0481424	0.0345359	0.110318	0.0680742	0.084271	0.0349292	0.0562154	0.0654904	0.0691134
IL-13	0.0642427	0.0647529	0.0376849	0.0407651	0.210099	0.112887	0.193326	0.0406661	0.18751	0.125481	0.098813	0.0823488	0.105506	0.107204	0.13937
IL-13 R alpha 2	0.0789697	0.0366554	0.0203211	0.0245277	0.11161	0.052785	0.132026	0.0524435	0.113322	0.0878219	0.076429	0.170525	0.171566	0.0962772	0.0846145
IL-15	0.0547267	0.0522742	0.034749	0.0434125	0.168602	0.0755421	0.185348	0.0800504	0.11883	0.0998534	0.0926222	0.190053	0.188907	0.0856862	0.0927988
IL-15 R alpha	0.0784469	0.0747778	0.045045	0.0593007	0.293485	0.097012	0.232365	0.100551	0.194959	0.143537	0.218511	0.107875	0.122574	0.0853312	0.138374
IL-16	0.0326952	0.044693	0.025191	0.0270029	0.135092	0.156987	0.346797	0.106014	0.205627	0.154203	0.230459	0.0976041	0.127333	0.094407	0.203496
IL-17	0.0957065	0.0982179	0.0754635	0.0737426	0.281605	0.245478	0.265882	0.0833966	0.289345	0.301221	0.440453	0.243977	0.217387	0.167472	0.216916
IL-17BR	0.0791308	0.0829838	0.055869	0.0628063	0.156679	0.0956126	0.183667	0.0636549	0.122213	0.0912093	0.132007	0.0989881	0.124204	0.0948954	0.0935912
IL-17C	0.0368896	0.0398257	0.0301567	0.0366175	0.0957813	0.0389135	0.0785613	0.0144982	0.0778597	0.0368911	0.05166	0.0410446	0.0471988	0.0564527	0.024652
IL-17D	0.0184104	0.0255356	0.0168041	0.0267466	0.0592634	0.0536933	0.109398	0.024257	0.115161	0.0643462	0.0644625	0.0308223	0.082149	0.0550053	0.0574916
IL-17E	0.0347027	0.0336033	0.0230122	0.0243153	0.0947366	0.0566156	0.132503	0.0565464	0.104481	0.0849357	0.0587706	0.21572	0.169431	0.0716454	0.103009
IL-17F	0.0591723	0.0521058	0.029939	0.0362632	0.155766	0.0783224	0.160701	0.0770645	0.123574	0.103166	0.131661	0.125316	0.144913	0.0811226	0.0887812
IL-17R	0.0377677	0.0654229	0.0306916	0.0385738	0.145583	0.120341	0.288664	0.106709	0.214716	0.161169	0.254215	0.144384	0.165797	0.194008	0.366443
IL-17RC	0.0359234	0.0247085	0.0173288	0.0198134	0.0605784	0.0433259	0.0854777	0.0187918	0.0839807	0.0667157	0.0896327	0.0352144	0.0779902	0.0438759	0.0469812
IL-17RD	0.0159176	0.0345662	0.0168933	0.0111914	0.0707333	0.0465717	0.0838579	0.0242458	0.104595	0.0611703	0.0686742	0.0336669	0.0513204	0.0940854	0.0636329
IL-18 R alpha/IL-1 R5	0.0481909	0.0530071	0.037976	0.0389809	0.190097	0.144768	0.189751	0.0907578	0.192011	0.1051	0.0872919	0.339353	0.294111	0.189354	0.17424
IL-2	0.0318116	0.0314865	0.0187212	0.031873	0.0866492	0.0571593	0.128528	0.0281568	0.110831	0.0896697	0.0858919	0.0139633	0.0587769	0.063638	0.0784461
IL-2 R alpha	0.0575394	0.0492711	0.0291875	0.0371817	0.0935141	0.0582982	0.109489	0.0388988	0.138602	0.0637942	0.0942199	0.0687709	0.0542608	0.050518	0.0609334
IL-2 R beta	0.0612346	0.0668132	0.045986	0.0575894	0.14723	0.0940227	0.137293	0.069473	0.171278	0.0813897	0.131155	0.10195	0.113316	0.0842293	0.123872
IL-20	0.0129664	0.0309522	0.0172081	0.0161834	0.0710867	0.022442	0.0739827	0.0259165	0.0827335	0.0700561	0.0423146	0.0513323	0.0939946	0.0621943	0.0567297
IL-20 R alpha	0.0730652	0.0721104	0.0466562	0.0583483	0.197751	0.0880389	0.178991	0.0550664	0.152099	0.0928604	0.112104	0.0824275	0.136676	0.101689	0.105211
IL-21	0.0419943	0.0397855	0.0206269	0.0284341	0.113255	0.0513197	0.121173	0.0325457	0.1225	0.0785925	0.0595834	0.0335902	0.0505685	0.0471934	0.0573327
IL-21 R	0.0460094	0.0553841	0.0330204	0.0361878	0.151554	0.0875014	0.167647	0.0693665	0.131055	0.0921958	0.104784	0.199785	0.194575	0.110359	0.12434
IL-22	0.0572377	0.0621873	0.0473976	0.0481733	0.230207	0.115499	0.226864	0.0641267	0.184764	0.112451	0.105275	0.196582	0.210883	0.0820291	0.112678
IL-22BP	0.0410002	0.0321187	0.0239792	0.0330642	0.101057	0.0607253	0.117743	0.0311538	0.0976206	0.0776931	0.0766034	0.0319477	0.0629908	0.0499463	0.0557675
IL-23	0.0254605	0.0249787	0.0256389	0.0325314	0.0709558	0.0535872	0.105389	0.0234644	0.0796543	0.0826386	0.0729115	0.0238759	0.0656746	0.0593997	0.0367288
IL-23 R	0.0576768	0.0876173	0.0445767	0.0461114	0.169951	0.173276	0.755063	0.19266	0.42887	0.238164	0.425203	0.264649	0.178496	0.184283	0.595808
IL-24	0.0273886	0.0173887	0.0191014	0.0179789	0.0460627	0.043015	0.0773156	0.0267499	0.0961506	0.0665738	0.054367	0.016627	0.0434489	0.0293526	0.0601617
IL-27	0.0766498	0.0832603	0.0494985	0.0554169	0.236137	0.178207	0.528655	0.139772	0.35427	0.220651	0.311352	0.161091	0.197481	0.17615	0.37926
IL-28 / IFN-lambda	0.075996	0.0706547	0.0450597	0.0498382	0.2632	0.172624	0.470508	0.134764	0.323401	0.196442	0.310189	0.175737	0.14295	0.150034	0.252789
IL-3	0.0968853	0.091489	0.0696086	0.0733669	0.19434	0.102336	0.187972	0.0787129	0.175048	0.11944	0.204685	0.164171	0.221717	0.168915	0.19514
IL-3 R alpha	0.0731199	0.0779669	0.0529173	0.0473905	0.201252	0.116311	0.253008	0.0940074	0.180686	0.134199	0.201747	0.10345	0.168877	0.107893	0.209125
IL-3 R beta	0.0696921	0.0531516	0.0528146	0.0619694	0.107129	0.0799586	0.123502	0.0393955	0.139621	0.089426	0.0829488	0.0714795	0.091011	0.100457	0.084842
IL-31	0.0588846	0.051931	0.0379129	0.0370686	0.150203	0.145706	0.209944	0.0786856	0.306529	0.142655	0.248977	0.112412	0.154836	0.130712	0.216124
IL-31 RA	0.0236741	0.0198575	0.0197299	0.0119252	0.0731127	0.0375306	0.0863031	0.0336281	0.100236	0.071025	0.0786151	0.0217979	0.0295276	0.037323	0.0369367
IL-4	0.0680334	0.0637158	0.0436504	0.0548967	0.181757	0.0901128	0.166643	0.0555692	0.184917	0.106902	0.126605	0.140084	0.140305	0.0990063	0.129058
IL-4 R	0.0611927	0.0585858	0.0401323	0.0442066	0.11174	0.059954	0.107823	0.0454712	0.140281	0.0896609	0.0932734	0.0681443	0.0727402	0.0734477	0.0824136
IL-5	0.148815	0.205767	0.103835	0.110311	0.216485	0.168225	0.367139	0.123164	0.439575	0.292811	0.331921	0.231926	0.257285	0.179467	0.259094
IL-5 R alpha	0.0425182	0.0390639	0.0235967	0.031858	0.0907064	0.0351097	0.0872317	0.0285097	0.0925231	0.0418277	0.0345342	0.0531037	0.0233925	0.0523668	0.0449795
IL-6	0.0986169	0.0894613	0.0591457	0.0727349	0.185048	0.122033	0.258543	0.0882004	0.352655	0.21534	0.289318	0.175416	0.156286	0.148278	0.232289
IL-6 R	0.0360887	0.0297744	0.0163032	0.0212269	0.0794932	0.0451002	0.0927895	0.0329841	0.105909	0.0647612	0.0693998	0.0192784	0.0766016	0.0486705	0.0589763
IL-7	0.0456294	0.0424994	0.0320794	0.0325113	0.101926	0.0720215	0.156941	0.0407676	0.14677	0.0789097	0.0855361	0.0484326	0.0990779	0.0678585	0.0769592
IL-7 R alpha	0.0337215	0.0393103	0.0320388	0.0307246	0.102767	0.0439664	0.10631	0.0300342	0.102087	0.0536654	0.0779441	0.0419666	0.0725411	0.0754584	0.0779671
IL-9	0.0606098	0.062274	0.0454038	0.0544092	0.18312	0.0902456	0.323261	0.081804	0.146536	0.125268	0.140198	0.153911	0.141684	0.0857672	0.105386
IL-9 R	0.063138	0.0618918	0.0492898	0.0535046	0.138352	0.0693606	0.126116	0.0477523	0.1518	0.0724843	0.108149	0.0755323	0.125313	0.0857755	0.0759132
Insulin	0.0540976	0.0480996	0.0309816	0.0306719	0.141328	0.0592188	0.207709	0.0433733	0.133625	0.0704838	0.064116	0.0840905	0.0983632	0.0733738	0.0754789
Integrin beta 2 / CD18	0.0271363	0.0205665	0.0114615	0.0175643	0.0692156	0.0317765	0.137663	0.0475195	0.0909478	0.0669555	0.0561485	0.123543	0.13898	0.0860959	0.0800962
KC	0.0289817	0.0247927	0.0212148	0.0198046	0.0772676	0.0463564	0.109623	0.0477548	0.0835573	0.0630651	0.0483344	0.111342	0.226098	0.107801	0.0923711
Kremen-1	0.0744265	0.0660401	0.0408488	0.0529052	0.244191	0.120815	0.211419	0.0642072	0.191836	0.197328	0.115528	0.164529	0.173883	0.0832311	0.125076
Kremen-2	0.0443615	0.0353657	0.0352839	0.0312197	0.120418	0.0586267	0.123131	0.0175101	0.131836	0.0747011	0.0613823	0.0444299	0.0700732	0.0403677	0.0576865
L-Selectin	0.0583188	0.0616606	0.0426078	0.0497175	0.185813	0.128499	0.12665	0.0552175	0.110118	0.0833266	0.101948	0.114453	0.106207	0.0808379	0.0804336
Lefty-1	0.0727947	0.0730431	0.0491769	0.0541139	0.203302	0.101709	0.234184	0.0676662	0.144313	0.118201	0.13255	0.186027	0.137951	0.0810392	0.100849
Leptin R	0.0514191	0.0477953	0.0333206	0.0372784	0.135226	0.0718145	0.13291	0.0244068	0.119814	0.094626	0.0732557	0.0457955	0.0986426	0.0575033	0.0577833
LEPTIN(OB)	0.0393566	0.0405774	0.0213389	0.0305739	0.0837032	0.0591251	0.0946607	0.0240923	0.114999	0.0741746	0.0604136	0.0376736	0.0713372	0.0555235	0.0525695
LIF	0.0532098	0.0608975	0.0369978	0.0228402	0.124864	0.105508	0.230354	0.061879	0.171267	0.117543	0.136669	0.0438974	0.108665	0.115814	0.248196
LIGHT / TNFSF14	0.0595008	0.0600478	0.0271926	0.0342955	0.116517	0.0533658	0.10117	0.034952	0.0941902	0.0219763	0.068794	0.0452987	0.0578043	0.058093	0.075063
LIX	0.042427	0.0530221	0.0384127	0.0359189	0.214776	0.117274	0.369454	0.110426	0.224098	0.174908	0.289846	0.174272	0.143426	0.162919	0.269148
LRP-6	0.0535104	0.043852	0.0347976	0.0302371	0.130283	0.0869083	0.167604	0.0587569	0.162624	0.112935	0.150407	0.0482792	0.0828685	0.0827796	0.0886811
Lungkine	0.0617274	0.0755119	0.0442202	0.0667051	0.258238	0.189845	0.483821	0.14523	0.236276	0.148955	0.166691	0.140977	0.17691	0.157825	0.433981
Lymphotactin	0.0251481	0.0367447	0.00981304	0.0158555	0.0943041	0.043258	0.120075	0.046156	0.0880674	0.0636827	0.0550426	0.179345	0.238067	0.150322	0.0992481
Lymphotoxin beta R / TNFRSF3	0.0833005	0.075341	0.0404753	0.0486583	0.356573	0.218729	0.569908	0.123626	0.273195	0.176979	0.339558	0.192465	0.224667	0.134738	0.338263
M-CSF	0.0645948	0.0638302	0.0387219	0.0498947	0.22444	0.204028	0.521802	0.127527	0.405692	0.192992	0.327503	0.137966	0.194488	0.124798	0.472202
MAdCAM-1	0.0581041	0.0685001	0.0365724	0.0388176	0.143107	0.0842197	0.163776	0.0597712	0.108756	0.11109	0.0969235	0.161198	0.179212	0.0829345	0.153684
MCP-1	0.0581395	0.06312	0.0455008	0.0555777	0.144863	0.0698539	0.133995	0.0571371	0.215904	0.111437	0.115587	0.0763295	0.139441	0.0885856	0.108953
MCP-5	0.0238576	0.0410689	0.016592	0.03588	0.0931513	0.0699311	0.265981	0.0453102	0.112504	0.077467	0.0780709	0.124377	0.158204	0.0833216	0.0933921
MDC	0.0637982	0.0612105	0.0445045	0.0476016	0.185186	0.111758	0.215363	0.0796702	0.288739	0.124744	0.120202	0.173303	0.194653	0.169439	0.121739
MFG-E8	0.0522929	0.0565657	0.0408454	0.0341875	0.160088	0.0846985	0.230776	0.0896766	0.134077	0.0964494	0.0924199	0.256914	0.191625	0.090906	0.108624
MFRP	0.045537	0.0440846	0.0272265	0.0422352	0.11387	0.0663353	0.151308	0.051049	0.190474	0.0878836	0.0840535	0.036997	0.0773175	0.0686602	0.0709997
MIG	0.0390442	0.0327234	0.0216717	0.0243292	0.0794132	0.0631215	0.0909387	0.0251647	0.117513	0.079492	0.0680975	0.0314151	0.0765728	0.0575212	0.0599853
MIP-1 alpha	0.0309496	0.0253584	0.026255	0.0309759	0.0779548	0.0419317	0.0893168	0.0221269	0.0906893	0.070934	0.0459227	0.0579864	0.0986978	0.0721254	0.072811
MIP-1 gamma	0.0558389	0.0478833	0.0413904	0.0430482	0.255723	0.129594	0.353397	0.116725	0.201957	0.174256	0.20811	0.33702	0.239688	0.139011	0.126659
MIP-2	0.0353565	0.0387911	0.0281009	0.0330252	0.121759	0.137592	0.219651	0.0790671	0.17611	0.10003	0.123765	0.0678673	0.0944239	0.0877898	0.196231
MIP-3 alpha	0.024491	0.0548386	0.022518	0.0270218	0.141664	0.0742827	0.163237	0.0809631	0.127835	0.0957271	0.0670998	0.256186	0.265476	0.138479	0.102115
MIP-3 beta	0.0250085	0.0410538	0.0234613	0.0207909	0.0783311	0.0606151	0.126122	0.0469412	0.0797854	0.0640272	0.0464239	0.126113	0.184577	0.133245	0.0949823
MMP-12	0.025395	0.0277405	0.020206	0.0239748	0.0647229	0.0658513	0.0951336	0.0179076	0.106337	0.0634624	0.0594799	0.0249696	0.0770717	0.0583836	0.0529418
MMP-14 / LEM-2	0.0668665	0.056562	0.0342887	0.0403329	0.151339	0.0697725	0.152068	0.0382561	0.117088	0.0423406	0.0762011	0.0770399	0.0971424	0.09855	0.0722656
MMP-2	0.0537906	0.055535	0.0445576	0.0460574	0.0674412	0.0589325	0.087523	0.0603198	0.125283	0.0933361	0.0681382	0.0493055	0.0853628	0.0880233	0.100219
MMP-24 / MT5-MMP	0.0659743	0.0578002	0.0390559	0.0529291	0.140669	0.108297	0.203534	0.0665912	0.123939	0.115874	0.125689	0.124836	0.192205	0.0865105	0.113763
MMP-3	0.0411215	0.0150079	0.00922632	0.0189967	0.0800972	0.0621072	0.151986	0.0445324	0.112239	0.0756544	0.0781697	0.101391	0.26714	0.0640466	0.110047
MMP-9	0.0229204	0.0272087	0.0152166	0.0212508	0.0858654	0.0634922	0.116298	0.0255363	0.119129	0.0663957	0.0669765	0.0385179	0.0704965	0.0537712	0.0590503
Neuregulin-3 / NRG3	0.0561867	0.0382732	0.0343327	0.034768	0.113167	0.0720575	0.142906	0.032755	0.172415	0.0776735	0.0829384	0.0426555	0.0741349	0.0420616	0.0534631
Neurturin	0.0371204	0.0390576	0.0259684	0.0274477	0.0886482	0.0476323	0.113159	0.0315884	0.1186	0.0699945	0.0584613	0.0309869	0.0408227	0.0503608	0.0538125
NGF R / TNFRSF16	0.0404634	0.0368867	0.0253738	0.0261875	0.102712	0.0443845	0.112108	0.0330807	0.121156	0.0837583	0.0635451	0.0249399	0.0565344	0.0545694	0.072467
NOV / CCN3	0.0624295	0.0644675	0.0345978	0.0390375	0.154921	0.0956744	0.203954	0.112369	0.163179	0.126063	0.141093	0.250081	0.243664	0.139972	0.120135
Osteoactivin / GPNMB	0.0605808	0.0600239	0.0462726	0.0413783	0.202122	0.137223	0.350105	0.0953053	0.245257	0.191918	0.352615	0.106525	0.158956	0.118157	0.199166
Osteopontin	0.0231502	0.0368201	0.0167218	0.0274239	0.131636	0.0859249	0.199901	0.0297036	0.140175	0.061413	0.214477	0.0545735	0.0581281	0.0607768	0.124245
Osteoporotegerin	0.057548	0.0607932	0.0348889	0.0333582	0.182883	0.0975145	0.220824	0.0970353	0.193714	0.112876	0.377203	0.349355	0.279636	0.309786	0.141756
OX40 Ligand / TNFSF4	0.0621783	0.0663745	0.0361087	0.0383992	0.161011	0.0658585	0.16154	0.040858	0.100152	0.0666413	0.070994	0.0893514	0.111221	0.0665005	0.0990141
P-Selectin	0.0446052	0.0792491	0.0507961	0.0514213	0.194513	0.16662	0.636094	0.116371	0.320761	0.189024	0.23265	0.126766	0.170019	0.222177	0.365934
PDGF C	0.0215227	0.0185653	0.0168572	0.0132131	0.083038	0.0521085	0.105159	0.029872	0.112375	0.0818272	0.0778895	0.0813921	0.107975	0.0732356	0.112597
PDGF R alpha	0.0222602	0.0299969	0.0153644	0.0136416	0.124316	0.0642779	0.165419	0.08343	0.109228	0.104429	0.0713894	0.311652	0.433281	0.0765472	0.0994495
PDGF R beta	0.0234186	0.035993	0.0290138	0.0151305	0.0834236	0.0746967	0.138579	0.0494155	0.110998	0.0790036	0.0781197	0.123953	0.287534	0.0832763	0.101842
Pentraxin3 / TSG-14	0.0512044	0.0592923	0.0403782	0.046222	0.201355	0.136485	0.283496	0.0812999	0.217918	0.158049	0.219539	0.079585	0.103574	0.0857219	0.115975
PF-4	0.0517873	0.0629427	0.0419974	0.0491245	0.208659	0.223881	0.54062	0.135121	0.397532	0.252135	0.397459	0.132798	0.304882	0.219533	0.557836
PlGF-2	0.0664381	0.0986516	0.0444865	0.0454003	0.227917	0.0942966	0.261344	0.128758	0.133613	0.137678	0.0924711	0.436435	0.42394	0.133674	0.140956
Progranulin	0.0300424	0.0407182	0.0321494	0.0257502	0.181529	0.132975	0.261086	0.0618406	0.165941	0.118972	0.149115	0.083927	0.0875034	0.0869679	0.0959946
Prolactin	0.087511	0.112565	0.0592303	0.0706341	0.482887	0.271175	0.997939	0.241469	0.46687	0.445923	0.499942	0.278774	0.224693	0.279539	0.484988
RAGE	0.0302485	0.0370464	0.02542	0.0260166	0.116782	0.0616634	0.171422	0.0949845	0.12365	0.103688	0.108289	0.314582	0.25738	0.141837	0.0925975
RANTES	0.0634365	0.0514911	0.0355186	0.0401909	0.180227	0.0831724	0.228795	0.0648599	0.19022	0.125364	0.182713	0.22412	0.193568	0.118031	0.134333
RELM beta	0.0503895	0.0628007	0.0394711	0.0432128	0.253049	0.128352	0.222167	0.0574838	0.21245	0.0889993	0.138859	0.100089	0.110551	0.0821471	0.108994
Resistin	0.0468801	0.0451518	0.0398073	0.0319987	0.158691	0.0844287	0.208647	0.0545921	0.161596	0.08216	0.100897	0.0992058	0.161258	0.104986	0.115967
S100A10	0.0352406	0.0374448	0.0204633	0.0172288	0.0826076	0.0494384	0.1179	0.0360505	0.0994348	0.06201	0.0462507	0.0873624	0.119648	0.0792095	0.0599157
SCF	0.0341928	0.0248065	0.0242804	0.022119	0.0718092	0.0727938	0.108318	0.0254434	0.156774	0.0860064	0.0927106	0.0372566	0.0611165	0.0521548	0.0595924
SCF R / c-kit	0.00994972	0.0347548	0.0187268	0.0200232	0.0912324	0.0597028	0.127704	0.0542652	0.109421	0.0876252	0.0764755	0.207504	0.177771	0.0805544	0.0777962
SDF-1	0.0205178	0.022887	0.0148578	0.0188283	0.0686876	0.0613205	0.110934	0.0256056	0.10555	0.085702	0.0673486	0.0515122	0.0683836	0.0546075	0.065172
Serum Amyloid A1	0.0340725	0.0331005	0.0165728	0.0239258	0.0766751	0.0595895	0.113487	0.0273233	0.112019	0.0675887	0.0578345	0.0344417	0.161963	0.0585623	0.0530648
Shh-N	0.0411076	0.0439651	0.0286132	0.0401645	0.152213	0.451829	0.228777	0.109503	0.115429	0.118956	0.0898629	0.360968	0.37828	0.113192	0.165413
SIGIRR	0.0636963	0.0633475	0.037668	0.0555061	0.198344	0.125384	0.235735	0.074579	0.190985	0.137214	0.140152	0.232809	0.200035	0.104992	0.127093
SLPI	0.0384677	0.0449896	0.032858	0.0360295	0.24695	0.222226	0.404086	0.121114	0.391522	0.206913	0.357696	0.16948	0.179014	0.116779	0.370849
Soggy-1	0.0454512	0.0593916	0.0340438	0.0277882	0.198324	0.173696	0.634142	0.139465	0.265132	0.210491	0.244858	0.107237	0.153095	0.191487	0.290277
SPARC	0.0446406	0.0651451	0.0269151	0.0370522	0.214808	0.17947	0.589164	0.148124	0.350339	0.255092	0.290346	0.134009	0.175521	0.179445	0.35371
Spinesin Ectodomain	0.0574267	0.0584953	0.0395106	0.0390928	0.151324	0.0702205	0.14507	0.0473226	0.115645	0.0812938	0.0853361	0.0813594	0.0782709	0.0791917	0.0802834
TACI / TNFRSF13B	0.0681891	0.0461587	0.0451341	0.0356689	0.138902	0.0755153	0.228634	0.0751165	0.222764	0.15171	0.115667	0.198595	0.211768	0.132722	0.113258
TARC	0.0453213	0.0584211	0.0321009	0.0340292	0.136591	0.0741571	0.178961	0.0664166	0.156434	0.098721	0.0919815	0.207867	0.226631	0.106666	0.130478
TCA-3	0.0675289	0.0841114	0.0591479	0.0613839	0.236245	0.224649	0.598913	0.156674	0.442668	0.155717	0.266297	0.23761	0.170354	0.151767	0.392441
TCCR / WSX-1	0.043333	0.0452209	0.0369267	0.0383678	0.143458	0.101824	0.240343	0.121565	0.2232	0.11373	0.142861	0.0963183	0.100185	0.086844	0.158297
TECK	0.0466643	0.0456244	0.0302944	0.0344664	0.105189	0.0595308	0.133031	0.0460458	0.144046	0.0797132	0.0865687	0.14757	0.155795	0.081399	0.0759839
TFPI	0.0407651	0.0349949	0.023345	0.0289882	0.0993437	0.0656948	0.122165	0.0299711	0.146123	0.0668371	0.0818105	0.0427812	0.0927174	0.0591829	0.0717312
TGF-beta 1	0.0518238	0.0543068	0.0424318	0.0411911	0.114054	0.0686182	0.173449	0.0377657	0.210652	0.12617	0.143959	0.0777155	0.0981462	0.0700062	0.10824
TGF-beta 2	0.037421	0.0536921	0.0295407	0.0317097	0.227997	0.117409	0.282125	0.0843465	0.249352	0.135876	0.224651	0.0630449	0.154925	0.114336	0.225002
TGF-beta 3	0.277624	0.180336	0.103616	0.096025	0.786139	0.257366	0.480015	0.289137	0.398918	0.198635	0.350572	0.192564	1.04633	0.925023	1.14829
TGF-beta RI / ALK-5	0.0272286	0.0312024	0.0210613	0.0284504	0.0664058	0.0462473	0.109718	0.0294361	0.102633	0.0544181	0.0559113	0.0441273	0.153525	0.0660133	0.0437212
TGF-beta RII	0.0616103	0.0840548	0.0425683	0.0548678	0.342824	0.21824	0.818791	0.21954	0.354509	0.348681	0.36483	0.201987	0.307761	0.230836	0.300609
Thrombospondin	0.118892	0.0751738	0.0778499	0.0562035	0.249263	0.143359	0.231822	0.0723771	0.233848	0.0949549	0.138397	0.04194	0.167917	0.251996	0.165855
Thymus Chemokine-1	0.0341402	0.0372663	0.0291841	0.0232323	0.0833852	0.0544131	0.125401	0.0327637	0.108649	0.0693436	0.0484449	0.0634895	0.121105	0.0758908	0.069367
Tie-2	0.028723	0.0250064	0.0190721	0.0165817	0.054096	0.0337381	0.0933828	0.0215312	0.101787	0.0652858	0.0642218	0.0249481	0.0472911	0.0444738	0.0465643
TIMP-1	0.0281454	0.0250818	0.00965169	0.0131742	0.0730556	0.0362712	0.139669	0.0212055	0.0925953	0.0594575	0.0481658	0.0232473	0.0389208	0.0446585	0.0526337
TIMP-2	0.475987	0.526748	0.418696	0.406593	0.984735	0.632455	0.963704	0.376682	0.556949	0.592595	1.04523	0.541594	1.00462	0.811607	0.851606
TIMP-4	0.0353533	0.0433102	0.0109357	0.0188522	0.073435	0.0473264	0.106317	0.0283945	0.154569	0.0516101	0.0838407	0.0316574	0.0805181	0.062772	0.0698438
TL1A / TNFSF15	0.049783	0.0518933	0.0350063	0.0382635	0.162871	0.0512703	0.131969	0.0329012	0.119131	0.0689541	0.083914	0.0684274	0.0913564	0.0679681	0.0842292
TLR1	0.0542414	0.0499198	0.03044	0.0380876	0.112737	0.0473409	0.065337	0.0249765	0.111593	0.0432851	0.080843	0.0583176	0.158079	0.0517533	0.0633586
TLR2	0.0716159	0.100418	0.0513309	0.0652903	0.246901	0.428292	0.741467	0.250129	0.632296	0.291785	0.553768	0.152609	0.268693	0.214308	0.557529
TLR3	0.0415617	0.0828468	0.0271577	0.0332828	0.118191	0.067712	0.151049	0.0396481	0.143096	0.0947298	0.075765	0.122864	0.150535	0.0605254	0.0755093
TLR4	0.048923	0.0465936	0.0274736	0.0439792	0.134756	0.0765317	0.152169	0.0691746	0.148437	0.10473	0.0948967	0.215486	0.193441	0.0887499	0.102492
TMEFF1 / Tomoregulin-1	0.0197191	0.0392814	0.0131292	0.020801	0.0723674	0.0507071	0.126189	0.0191336	0.153624	0.0589398	0.0841268	0.0265324	0.0812892	0.0553329	0.0519774
TNF RI / TNFRSF1A	0.0183095	0.0341099	0.0180047	0.0158969	0.0804683	0.0457098	0.131935	0.0507803	0.089147	0.0734738	0.0446564	0.155555	0.19841	0.0919722	0.0674088
TNF RII	0.0214722	0.0444164	0.011202	0.0146015	0.067884	0.0631905	0.115867	0.0183373	0.0741235	0.0482306	0.0603311	0.0298738	0.162325	0.0721874	0.0696794
TNF-alpha	0.0829441	0.0821592	0.0485157	0.0531666	0.212838	0.104038	0.204592	0.0697975	0.162568	0.114919	0.140709	0.195639	0.174812	0.111122	0.129724
TNF-beta / TNFSF1B	0.0766434	0.0595236	0.0424295	0.0408242	0.215458	0.213368	0.450406	0.12077	0.422015	0.273636	0.300894	0.127774	0.131576	0.120373	0.16764
TPO	0.0682589	0.0408137	0.0313437	0.0304444	0.14387	0.0766244	0.155955	0.069203	0.128696	0.0762113	0.0937048	0.160558	0.229224	0.119176	0.0974673
TRAIL / TNFSF10	0.0258845	0.0277656	0.0228689	0.0273598	0.0583995	0.0542977	0.126484	0.0409472	0.1117	0.0770344	0.075915	0.0858915	0.1239	0.0790809	0.0628372
TRAIL R2 / TNFRSF10B	0.0402133	0.0383373	0.0252519	0.0257829	0.109145	0.0729822	0.159644	0.0724836	0.12624	0.0917075	0.09787	0.19956	0.212995	0.0962212	0.118015
TRANCE / TNFSF11	0.0564122	0.0659194	0.0359507	0.0343031	0.15834	0.0954015	0.189969	0.0746868	0.158524	0.11901	0.113686	0.204808	0.244301	0.115799	0.1275
TREM-1	0.034006	0.0323827	0.0167782	0.0191575	0.0621511	0.0374019	0.0820662	0.0235275	0.109929	0.068131	0.073815	0.0281269	0.0645857	0.0575331	0.0773325
TROY	0.0640001	0.055227	0.0454726	0.040211	0.16368	0.075745	0.125626	0.0365124	0.186961	0.0867414	0.0969153	0.0508121	0.114394	0.0783662	0.0934802
TSLP	0.0522103	0.0469242	0.0325623	0.0358523	0.116238	0.0705788	0.147846	0.0553327	0.159894	0.0857274	0.0778767	0.16039	0.200054	0.088576	0.0950019
TSLP R	0.0384945	0.0351432	0.019951	0.021286	0.0668403	0.0619383	0.0930657	0.0368715	0.133206	0.0682005	0.0704324	0.0218725	0.0657166	0.0520476	0.0603859
TWEAK / TNFSF12	0.0649974	0.0767715	0.0610593	0.071432	0.173893	0.114297	0.173129	0.0545513	0.160687	0.0902374	0.152968	0.0861	0.106977	0.0873646	0.0905272
TWEAK R / TNFRSF12	0.0521534	0.0515225	0.0360884	0.0418608	0.143163	0.0732715	0.149409	0.0486081	0.123921	0.0861865	0.114047	0.0662442	0.0749431	0.0630972	0.0817376
Ubiqultin	0.0625111	0.0649942	0.116319	0.0544394	0.139798	0.079244	0.129325	0.0596077	0.166845	0.101956	0.13853	0.0917954	0.0869458	0.0925868	0.111251
uPAR	0.0314273	0.0316989	0.0180882	0.0139243	0.0676512	0.064006	0.106067	0.0202433	0.0837846	0.0839922	0.0578194	0.0565268	0.113697	0.0652462	0.0568788
Urokinase	0.091364	0.0403172	0.0173694	0.0205384	0.0939039	0.0733848	0.178554	0.0483245	0.12382	0.0801644	0.0994642	0.0712751	0.091083	0.0905284	0.131406
VCAM-1	0.0352942	0.0345323	0.0224796	0.0226216	0.118438	0.0837367	0.25286	0.0545636	0.175446	0.105286	0.124872	0.150455	0.199088	0.115967	0.109309
VE-Cadherin	0.0338503	0.0332589	0.0194016	0.0179262	0.0906711	0.0871297	0.176147	0.0532608	0.186994	0.134275	0.212127	0.0685593	0.0829237	0.0928191	0.112393
VEGF	0.0193444	0.0251522	0.00911912	0.0161709	0.0619287	0.0546901	0.0900165	0.0119062	0.0999617	0.0496164	0.0722708	0.0260295	0.0494184	0.0589232	0.0456663
VEGF R1	0.0139852	0.0233546	0.0164205	0.0182151	0.0685815	0.0416434	0.0959011	0.0247499	0.111504	0.0670162	0.0779871	0.0146083	0.0424919	0.0502536	0.0350471
VEGF R2	0.0314037	0.033005	0.0210907	0.020424	0.0945817	0.0446883	0.128825	0.172549	0.103697	0.0750456	0.0666102	0.155998	0.186212	0.0991587	0.100884
VEGF R3	0.0311052	0.0381098	0.0166056	0.0197958	0.0827427	0.0486754	0.142777	0.0618629	0.0930847	0.0769767	0.0740557	0.193335	0.159926	0.101427	0.105832
VEGF-B	0.0415681	0.0622312	0.0294515	0.0358737	0.134662	0.100744	0.280406	0.0707436	0.208681	0.132619	0.181621	0.086974	0.130533	0.103341	0.220968
VEGF-D	0.0898803	0.0793459	0.0470952	0.061257	0.252319	0.119894	0.238684	0.0934774	0.230937	0.123476	0.168637	0.212757	0.219001	0.115555	0.158051
VEGFC	0.0673893	0.126656	0.0424634	0.0572526	0.158597	0.0729359	0.119536	0.0398202	0.119647	0.0708176	0.0860733	0.0585291	0.119486	0.0765889	0.0941584
WIF-1	0.031087	0.0343563	0.0216413	0.0178822	0.0739381	0.0465078	0.109748	0.0318931	0.106217	0.0716876	0.0591543	0.0772464	0.147637	0.0614915	0.0657783
WISP-1 / CCN4	0.0456294	0.0647843	0.0366886	0.0481017	0.150318	0.184167	0.480973	0.097262	0.307356	0.239252	0.345635	0.110345	0.161557	0.154259	0.257371

## Sheet: Sedentary Venn Diagram 7 -Day 
7 -Day Treatment				4 Month Treatment
Male		Female		Male		Female
Protein ID	p-value	Protein ID	p-value	Protein ID	p-value	Protein ID	p-value
IFN-beta	0.0101973	IFN-gamma R1	0.000781849	VEGFC	0.00490496	Fas / TNFRSF6	0.037074
MIG	0.0143286	VCAM-1	0.000886946	TNF RII	0.0177972
NGF R / TNFRSF16	0.01814	MIP-2	0.00174544	BAFF R / TNFRSF13C	0.0215579
CTLA-4 / CD152	0.0197841	IL-22BP	0.0119262	LIF	0.021661
Frizzled-7	0.0212694	GDF-8	0.0179369	TIMP-4	0.0237989
EGF R	0.0232614	Granzyme D	0.0324961	TMEFF1 / Tomoregulin-1	0.0246873
VCAM-1	0.0284724	FADD	0.0351779	TGF-beta 2	0.0281503
ICAM-5	0.0286823	CRG-2	0.0390332	TREM-1	0.030848
IL-11	0.0295512			AR (Amphiregulin)	0.0315882
CCL4 / MIP-1 beta	0.0307412			Gremlin	0.032141
Urokinase	0.0333889			ICK	0.0330755
AR (Amphiregulin)	0.039719			IL-7 R alpha	0.0352383
IL-5 R alpha	0.0413353			CCL7 / MCP-3 / MARC	0.0354054
GM-CSF	0.0481721			Growth Hormone R	0.036876
				IL-17RD	0.037058
				I-TAC	0.0373795
				Angiopoietin-like 3	0.0384232
				TSLP R	0.0390648
				NGF R / TNFRSF16	0.0391698
				VEGF	0.0392642
				Granzyme D	0.0398046
				VEGF R1	0.0405118
				TLR2	0.0418422
				IL-6 R	0.0420312
				VEGF-B	0.0434413
				IL-2	0.0435205
				DKK-1	0.0441911
				Activin RIB / ALK-4	0.0452465
				HGF	0.0468411
				Osteopontin	0.0488348
				IL-12 R beta 1	0.0494562

## Sheet: Exercised Venn Diagram 7-day 
7 -Day Treatment				4 Month Treatment
Male		Female		Male		Female
Protein ID	p-value	Protein ID	p-value	Protein ID	p-value	Protein ID	p-value
CD40	0.00138901	6Ckine	0.00158484	VEGFC	0.00490496	Fas / TNFRSF6	0.037074
SIGIRR	0.00702384	BLC	0.00378825	TNF RII	0.0177972
SLPI	0.00738013	SLPI	0.0052318	BAFF R / TNFRSF13C	0.0215579
Prolactin	0.0211728	CTACK	0.00625223	LIF	0.021661
IFN-gamma R1	0.0225503	Progranulin	0.00898106	TIMP-4	0.0237989
IFN-gamma	0.0283052	FADD	0.0107734	TMEFF1 / Tomoregulin-1	0.0246873
IL-15 R alpha	0.0290273	IFN-gamma	0.010945	TGF-beta 2	0.0281503
WIF-1	0.0318567	Adiponectin / Acrp30	0.0114687	TREM-1	0.030848
IL-22BP	0.0350926	IL-6	0.0133043	AR (Amphiregulin)	0.0315882
BAFF R / TNFRSF13C	0.0403446	MMP-14 / LEM-2	0.0133485	Gremlin	0.032141
GDF-1	0.0414354	Ubiqultin	0.0134308	ICK	0.0330755
IL-1 RI	0.0433329	Frizzled-6	0.0151792	IL-7 R alpha	0.0352383
Progranulin	0.044469	IL-13 R alpha 2	0.0158173	CCL7 / MCP-3 / MARC	0.0354054
MCP-1	0.0448401	PlGF-2	0.0160494	Growth Hormone R	0.036876
6Ckine	0.0467293	IGFBP-5	0.0177178	IL-17RD	0.037058
CCR4	0.0470744	Activin C	0.0181427	I-TAC	0.0373795
beta-Catenin	0.0477883	NOV / CCN3	0.0182688	Angiopoietin-like 3	0.0384232
IL-3 R beta	0.0493742	IFN-beta	0.0206669	TSLP R	0.0390648
		BCMA / TNFRSF17	0.0211994	NGF R / TNFRSF16	0.0391698
		IL-22BP	0.0214051	VEGF	0.0392642
		WIF-1	0.0216654	Granzyme D	0.0398046
		GFR alpha-4 / GDNF R alpha-4	0.0217036	VEGF R1	0.0405118
		FGF R4	0.0224098	TLR2	0.0418422
		GITR Ligand / TNFSF18	0.022852	IL-6 R	0.0420312
		Growth Hormone R	0.023386	VEGF-B	0.0434413
		TLR4	0.0242211	IL-2	0.0435205
		Neuregulin-3 / NRG3	0.0245841	DKK-1	0.0441911
		Angiopoietin-like 2	0.0246867	Activin RIB / ALK-4	0.0452465
		CCL8 / MCP-2	0.025604	HGF	0.0468411
		ICK	0.0262169	Osteopontin	0.0488348
		IL-2	0.0267796	IL-12 R beta 1	0.0494562
		Pentraxin3 / TSG-14	0.0272046
		CCR4	0.0276756
		Urokinase	0.0278428
		MCP-1	0.0293983
		IGFBP-6	0.0298154
		GDF-1	0.0298654
		TGF-beta 1	0.0299189
		IL-22	0.0300584
		IL-3 R alpha	0.0303465
		TNF-alpha	0.0310266
		CD40	0.0326975
		IL-10	0.0332252
		HVEM / TNFRSF14	0.033678
		GITR	0.033955
		TGF-beta RII	0.0350637
		beta-Catenin	0.0351841
		IL-2 R alpha	0.0361605
		IL-2 R beta	0.0368389
		FGF-21	0.037505
		CXCL14 / BRAK	0.03988
		CTLA-4 / CD152	0.0401693
		Neurturin	0.0408598
		DAN	0.0409926
		IL-16	0.0420019
		RELM beta	0.0420369
		EG-VEGF / PK1	0.0420869
		MMP-3	0.0432043
		Endostatin	0.0435336
		E-Selectin	0.0441748
		TGF-beta RI / ALK-5	0.0448707
		L-Selectin	0.0449195
		IGFBP-1	0.0451096
		IL-17C	0.0453033
		IL-23	0.0453335
		GM-CSF	0.0454657
		IL-7 R alpha	0.0458609
		CCL1 / I-309 / TCA-3	0.0459791
		Activin RIB / ALK-4	0.0464154
		MDC	0.0466494
		IFN-alpha / beta R1	0.0466809
		Fas / TNFRSF6	0.0473874
		IL-1 RI	0.0474246
		Kremen-2	0.0474724
		Angiopoietin-like 3	0.0475705
		MMP-12	0.0496503
		Kremen-1	0.0499004

## Sheet: ANL, Y&O control controls
Normalized BONCAT Array Data of Serum Samples
Legend: YC - Young Control OC - Old Control OA - Old Alk5i+OT Treated OE - Old Treadmill OEA - Old Treadmill Alk5i+OT Treated M: male, F: Female
ID	YC5_F	YC6_F	YC7_M	YC8_M	OC5_F	OC6_F	OC7_M	OC8_M
6Ckine	0.0130852	0.00834775	0.00869809	0.00835155	0.00640931	0.00581596	0.00560501	0.00921319
Activin A	0.0235601	0.00927263	0.00856878	0.00995766	0.00686167	0.00997202	0.00677699	0.00905723
Activin C	0.0124586	0.00865095	0.00833982	0.00958571	0.00711084	0.0063278	0.00633743	0.0096509
Activin RIB / ALK-4	0.0083635	0.0077169	0.00755567	0.00958571	0.00900436	0.00639314	0.00636978	0.00907712
Adiponectin / Acrp30	0.0099095	0.0123841	0.00955758	0.0162667	0.00714531	0.0100975	0.00819832	0.0122489
AgRP	0.0166905	0.0270477	0.0216195	0.0380049	0.0154155	0.0159914	0.0141804	0.026526
ALCAM	0.0108048	0.00933254	0.00938912	0.0106647	0.00644983	0.0056079	0.00580192	0.00929534
Angiopoietin-like 2	0.0102442	0.00736541	0.00695835	0.00888575	0.00801678	0.00590136	0.00582925	0.00927159
Angiopoietin-like 3	0.0102952	0.00998845	0.00931201	0.0123908	0.00846854	0.00601771	0.00591571	0.00946028
AR (Amphiregulin)	0.0102448	0.00840154	0.00841278	0.00970228	0.00860461	0.00608478	0.0052943	0.00837434
Artemin	0.0305015	0.0235144	0.0176352	0.0231287	0.00830646	0.00706662	0.0313753	0.0133721
Axl	0.0105028	0.0125131	0.00933752	0.0139097	0.00580817	0.00458937	0.00456578	0.00710677
b FGF	0.024317	0.0186883	0.0180777	0.0227287	0.0154596	0.0126413	0.0132087	0.0200039
B7-1/CD80	0.0259617	0.0225009	0.0215619	0.0282915	0.0203939	0.0141155	0.016622	0.0288551
BAFF R / TNFRSF13C	0.0437299	0.0397606	0.0396094	0.0479297	0.0374477	0.0328346	0.0328697	0.0354189
BCMA / TNFRSF17	0.0114775	0.00948047	0.0104835	0.0102997	0.00756925	0.00689237	0.00717193	0.0094513
beta-Catenin	0.00930869	0.00884473	0.00869038	0.00969466	0.0271679	0.00645447	0.00634635	0.00891089
BLC	0.0124726	0.0154204	0.0148391	0.0170294	0.0104183	0.00851387	0.00905514	0.0137444
BTC (Betacellulin)	0.00868214	0.00925307	0.00880901	0.0107531	0.010835	0.00633067	0.00688298	0.0143483
Cardiotrophin-1	0.00841017	0.0096284	0.00881554	0.00981942	0.00755111	0.00651408	0.00619072	0.00921511
CCL1 / I-309 / TCA-3	0.00780347	0.00732568	0.00759837	0.00833983	0.00665484	0.00527202	0.00560445	0.00899176
CCL28	0.00991325	0.00839543	0.00877164	0.00807683	0.00699654	0.00553625	0.00550181	0.00879023
CCL4 / MIP-1 beta	0.0098875	0.00872247	0.00874139	0.012016	0.00876064	0.00652898	0.00574948	0.00889934
CCL7 / MCP-3 / MARC	0.00954794	0.00929769	0.00877105	0.00996352	0.0083119	0.00585264	0.00532888	0.00916954
CCL8 / MCP-2	0.00948733	0.00854764	0.00809603	0.0115105	0.00713563	0.0076587	0.0100765	0.00920163
CCR10	0.0144236	0.0142253	0.0114136	0.0137668	0.0121776	0.00833561	0.00644174	0.0111033
CCR3	0.0142793	0.0113253	0.0121871	0.0169632	0.00788978	0.0140862	0.0104715	0.00867728
CCR4	0.0161278	0.0106376	0.00952911	0.0110149	0.00647765	0.00548467	0.00505053	0.00984344
CCR6	0.027535	0.0264144	0.021731	0.0387997	0.00873403	0.0134987	0.00838966	0.023084
CCR7	0.0154444	0.0116224	0.0118573	0.011367	0.0088574	0.00843993	0.00990526	0.00974268
CCR9	0.0129146	0.0159186	0.0142536	0.0152346	0.011037	0.00866461	0.0121025	0.0109364
CD11b	0.00979846	0.0100685	0.0101893	0.0105206	0.00835484	0.00778824	0.00987012	0.00944424
CD14	0.0106648	0.00994871	0.00892053	0.0117313	0.00677761	0.00687346	0.00697502	0.0136295
CD27 / TNFRSF7	0.00875402	0.00838932	0.00818382	0.00958981	0.00697356	0.00599823	0.00721321	0.00865674
CD27 Ligand / TNFSF7	0.0122526	0.0116591	0.0104894	0.0145733	0.00833791	0.00711534	0.00806445	0.00941857
CD30	0.0101498	0.0140841	0.0083594	0.0091341	0.00778818	0.00646364	0.00610928	0.00907776
CD30 L	0.0147256	0.0120729	0.0124469	0.0177949	0.00915313	0.00691415	0.00820223	0.00931909
CD40	0.0216992	0.0210625	0.0212849	0.0280349	0.00973129	0.0113963	0.0114058	0.0151352
CD40 Ligand / TNFSF5	0.0158478	0.00866501	0.00840982	0.0110179	0.00819216	0.00714973	0.0060323	0.00910215
Cerberus 1	0.0105114	0.0125192	0.00912813	0.0123112	0.00762489	0.00636104	0.00655107	0.013711
Chordin-Like 2	0.00969439	0.0101474	0.00932921	0.0111327	0.00682781	0.00638856	0.00598656	0.0082832
Coagulation Factor III / Tissue Factor	0.00916922	0.00850852	0.008567	0.00942932	0.00650426	0.00585321	0.0061645	0.00804317
Common gamma Chain / IL-2 R gamma	0.0118841	0.0150481	0.00880901	0.0140327	0.00719611	0.0073939	0.0069488	0.00942819
CRG-2	0.0161949	0.0188368	0.0125803	0.0183672	0.0112861	0.0115454	0.0111788	0.0108787
Cripto	0.0175402	0.0162908	0.0164756	0.0207318	0.0139737	0.024064	0.0146574	0.0139536
Crossveinless-2	0.0122097	0.012897	0.0118193	0.0172929	0.0107636	0.0102437	0.0117935	0.011362
CRP	0.00854428	0.00817903	0.00827991	0.00941233	0.00789703	0.0069302	0.00686903	0.00919072
Cryptic	0.00854374	0.00827929	0.00825678	0.0105065	0.00756865	0.00684136	0.007052	0.0100514
Csk	0.00893856	0.012043	0.0104088	0.0158151	0.00745918	0.00729818	0.016979	0.0102427
CTACK	0.0305718	0.0336765	0.0394427	0.0567598	0.00857981	0.0108369	0.0218633	0.0208941
CTLA-4 / CD152	0.0101369	0.00994933	0.00827873	0.0149746	0.00787466	0.00598447	0.00587834	0.00884671
CXCL14 / BRAK	0.00997065	0.0095526	0.00892112	0.00890683	0.00837661	0.00606185	0.00542371	0.00995127
CXCL16	0.00882591	0.00979956	0.00908009	0.00858292	0.00788191	0.00663674	0.00625096	0.00856753
CXCR2 / IL-8 RB	0.0122854	0.0120778	0.00866132	0.0111567	0.010529	0.00866633	0.00724222	0.0105802
CXCR3	0.0112887	0.0106878	0.00958486	0.00993657	0.00912773	0.00737957	0.00658454	0.00921062
CXCR4	0.0159261	0.0226837	0.029152	0.0146196	0.00772226	0.00792408	0.00814868	0.0100097
CXCR6	0.0240117	0.0248837	0.0393822	0.0365042	0.0102169	0.00853221	0.0256788	0.0095803
DAN	0.0205453	0.0209745	0.0150004	0.0281017	0.00669415	0.0101073	0.00646796	0.00881912
Decorin	0.0114694	0.0125063	0.0123609	0.0142231	0.00888462	0.00774983	0.00829539	0.0109615
DKK-1	0.00788983	0.0088105	0.00815772	0.00986921	0.0065345	0.00570304	0.00650366	0.00884864
Dkk-3	0.00828036	0.00975371	0.00904806	0.0112861	0.00717131	0.00669004	0.00716747	0.00937043
Dkk-4	0.00893963	0.00966691	0.00899467	0.0113523	0.00815224	0.00773665	0.00659793	0.00948082
DPPIV / CD26	0.014179	0.0156869	0.0142779	0.0158497	0.0091241	0.00861131	0.0113924	0.0151692
DR3 / TNFRSF25	0.0089584	0.00726394	0.00750999	0.00802177	0.00703282	0.00595008	0.0062889	0.00710484
Dtk	0.0134778	0.0161924	0.014224	0.0170569	0.0162198	0.00995195	0.0107849	0.0123747
E-Selectin	0.00871326	0.0089731	0.00866309	0.0110899	0.00652119	0.00607045	0.00573609	0.00895967
EDAR	0.0104626	0.00871147	0.00861564	0.0125478	0.00917067	0.0364502	0.00570597	0.00918687
EG-VEGF / PK1	0.00909841	0.0103552	0.00921295	0.0100742	0.00731041	0.00857405	0.0350809	0.00935118
EGF R	0.016182	0.0230236	0.0238059	0.0215326	0.00842983	0.013152	0.0137844	0.0142488
Endocan	0.00876797	0.011104	0.00964833	0.00847163	0.00683083	0.00706891	0.00637871	0.00906878
Endoglin / CD105	0.00838979	0.0127374	0.0121141	0.0132267	0.00701528	0.00587901	0.00543431	0.00865866
Endostatin	0.0126212	0.0148311	0.0175581	0.016518	0.00758256	0.00779855	0.00864124	0.00890897
Eotaxin-2	0.00880445	0.00937044	0.00876571	0.0110073	0.00676249	0.00615642	0.00603955	0.00881077
Eotaxin	0.00727455	0.00789479	0.00766243	0.00840251	0.00648551	0.00578214	0.00661355	0.00838718
Epigen	0.00854803	0.00915832	0.00884045	0.0107994	0.00691308	0.00617706	0.0065851	0.008581
Epiregulin	0.00821062	0.00897799	0.0078908	0.0117079	0.00726384	0.00629112	0.00660072	0.00914066
Erythropoietin (EPO)	0.00793758	0.0116554	0.00927998	0.0139759	0.00655748	0.00570534	0.00595364	0.00903605
FADD	0.0115419	0.0103595	0.00987077	0.0125279	0.00827985	0.00843821	0.00831045	0.00980943
FAM3B	0.012369	0.0104775	0.00961927	0.0105135	0.00744044	0.00627106	0.00580805	0.0094038
Fas / TNFRSF6	7.16533	6.58908	8.11611	7.07119	5.36522	4.46064	4.84818	4.52107
Fas Ligand	0.00859041	0.00942851	0.00912754	0.00851907	0.00844132	0.00811036	0.00765835	0.011842
FCrRIIB / CD32b	0.0142819	0.0180935	0.0174508	0.0180761	0.014668	0.0103308	0.0918048	0.0141019
FGF R3	0.0129006	0.0150566	0.0140964	0.0152616	0.0242578	0.0114519	0.0108056	0.0155247
FGF R4	0.00764307	0.0103387	0.00995559	0.00830586	0.00734912	0.00660292	0.0067954	0.00829091
FGF R5 beta	0.00894982	0.0113052	0.0106514	0.0114964	0.00990244	0.0115517	0.0110689	0.0115763
FGF-21	0.00809046	0.00863383	0.0095819	0.00855422	0.00699533	0.00650262	0.00700068	0.00905017
Fit-3 Ligand	0.00789949	0.00891686	0.00784928	0.00861923	0.00669294	0.0052554	0.0061394	0.00862593
FLRG (Follistatin)	0.010734	0.0157419	0.0165408	0.0164559	0.00793211	0.00637881	0.00650143	0.00883388
Follistatin-like 1	0.00789681	0.00978917	0.0114711	0.012416	0.00672439	0.00637308	0.00742741	0.00876199
Fractalkine	0.0102153	0.0154705	0.016061	0.0189324	0.00867416	0.00741453	0.0121103	0.0112131
Frizzled-1	0.0125069	0.0341087	0.0319333	0.021792	0.0109009	0.00916728	0.0172853	0.0171081
Frizzled-6	0.011713	0.00899572	0.00911093	0.0101521	0.00754506	0.00660235	0.00722325	0.00911756
Frizzled-7	0.00848098	0.00956727	0.00892468	0.0107361	0.00799682	0.00604752	0.00653545	0.00900011
G-CSF	0.00808509	0.00897432	0.00878944	0.00854836	0.00746463	0.00646651	0.0148498	0.00859641
Galectin-3	0.00927114	0.00888202	0.00907178	0.015213	0.00956982	0.00662126	0.00742407	0.00894812
GDF-1	0.0149273	0.0158146	0.0156742	0.0155275	0.0138189	0.0145276	0.0133415	0.0127945
GDF-3	0.00863655	0.0107697	0.0103548	0.0119398	0.00853446	0.00739447	0.00880356	0.00908354
GDF-5	0.00883985	0.019818	0.0212292	0.021064	0.00922631	0.00774296	0.00901665	0.0112246
GDF-8	0.0124275	0.0135908	0.0141326	0.0144316	0.00783232	0.00692734	0.00734876	0.00870937
GDF-9	0.00707607	0.00795225	0.00744237	0.00885295	0.00643531	0.00545658	0.00921077	0.00875814
GFR alpha-2 / GDNF R alpha-2	0.00784477	0.00879093	0.00830186	0.00959977	0.00701287	0.00587213	0.00712786	0.00862786
GFR alpha-3 / GDNF R alpha-3	0.00694357	0.00917177	0.00767904	0.0105188	0.00642685	0.00562624	0.00538634	0.00896609
GFR alpha-4 / GDNF R alpha-4	0.0100286	0.0128872	0.00957656	0.0142313	0.00889853	0.00894547	0.0084566	0.0101451
GITR	0.0073872	0.00812035	0.00679168	0.0103349	0.00668569	0.00569789	0.0060362	0.00880179
GITR Ligand / TNFSF18	0.00756636	0.00797425	0.0073878	0.00911126	0.00686833	0.00975077	0.00573498	0.0092241
Glut2	0.00783351	0.00958316	0.00979247	0.0123001	0.00710842	0.00656395	0.00646852	0.00898599
GM-CSF	0.00805935	0.00909352	0.0091222	0.0100695	0.00770593	0.00565375	0.00610928	0.00911948
Granzyme B	0.0109593	0.0122215	0.0109106	0.0127394	0.0103391	0.00712451	0.00771692	0.0117573
Granzyme D	0.00837155	0.00843027	0.00973909	0.00873228	0.0074997	0.00754292	0.0211599	0.00893015
Granzyme G	0.0123433	0.015512	0.0150087	0.0152844	0.0116151	0.0151093	0.0131607	0.0118696
Gremlin	0.00827714	0.00799687	0.00811383	0.0089988	0.0072324	0.00691129	0.00652262	0.00814329
Growth Hormone R	0.00717316	0.00795775	0.00811798	0.00792571	0.00628594	0.00589276	0.0051766	0.00792892
HGF R	0.00740651	0.00982951	0.0102462	0.00989674	0.00755534	0.00649173	0.0063285	0.00877162
HGF	0.00711576	0.00816559	0.00815001	0.00884416	0.00675886	0.00565203	0.00615781	0.0082248
HVEM / TNFRSF14	0.00806471	0.00907457	0.0087408	0.0104438	0.00785107	0.00611286	0.007052	0.0107959
I-TAC	0.00807544	0.00934048	0.00914533	0.00902223	0.00655929	0.00583774	0.00531661	0.00825111
ICAM-1	0.00817897	0.0102507	0.0088191	0.0108164	0.00798896	0.00618967	0.0252699	0.00829347
ICAM-2 / CD102	0.00831791	0.00879093	0.00808476	0.0104567	0.00713019	0.00624182	0.00673292	0.00918302
ICAM-5	0.010639	0.00899999	0.00800528	0.00974738	0.00742532	0.00752802	0.00743578	0.00898599
ICK	0.00805935	0.00945296	0.00822416	0.0101451	0.0053679	0.00486048	0.00508958	0.00781083
IFN-alpha / beta R1	0.00769243	0.010678	0.00790266	0.00874283	0.00683204	0.00557523	0.00549623	0.00856432
IFN-alpha / beta R2	0.0264412	0.0229233	0.0153136	0.0194022	0.00798472	0.00665451	0.00745865	0.0130332
IFN-beta	0.00946748	0.00926163	0.00877935	0.00891093	0.00792788	0.00646823	0.00627383	0.00917468
IFN-gamma	0.0124769	0.0136281	0.0134671	0.0132273	0.0100452	0.0102431	0.0140951	0.0112368
IFN-gamma R1	0.00888116	0.0101504	0.00976281	0.0104983	0.0111241	0.0127358	0.0175686	0.0108017
IGF-I	0.0164035	0.0242364	0.0364277	0.0234884	0.00804762	0.00592429	0.00685062	0.00854827
IGF-II	0.0664714	0.058293	0.136588	0.036554	0.0322189	0.0456914	0.079873	0.0196291
IGFBP-1	0.0158333	0.019343	0.0226089	0.0199364	0.010382	0.0116428	0.00811911	0.010844
IGFBP-2	0.00947338	0.0102201	0.00919634	0.00994184	0.00636516	0.00599192	0.00477329	0.00819335
IGFBP-3	0.00728098	0.00879521	0.00881138	0.00835565	0.00764424	0.00732454	0.0064066	0.00830438
IGFBP-5	0.00684647	0.00839971	0.00815535	0.0076469	0.00677519	0.00553912	0.00614442	0.00857844
IGFBP-6	0.00878621	0.0111322	0.0101982	0.011036	0.00781599	0.00695657	0.00696777	0.00897508
IGFBP-rp1 / IGFBP-7	0.00724182	0.00745527	0.00698801	0.00826896	0.00685926	0.00576323	0.00611039	0.00834867
IL-1 alpha	0.00868751	0.0126787	0.0154138	0.0150941	0.00723361	0.00631977	0.0187535	0.00968107
IL-1 beta	0.00815108	0.00870719	0.00785936	0.00841774	0.00700924	0.00604981	0.00610816	0.00885441
IL-1 R4 / ST2	0.00756744	0.00743999	0.00691327	0.00745712	0.00598839	0.00504447	0.00484023	0.00764909
IL-1 R6 / IL-1 R rp2	0.012332	0.0115613	0.0102427	0.0114203	0.00923659	0.00721965	0.00705256	0.0101348
IL-1 R9	0.00792899	0.00960945	0.00875148	0.00901578	0.00695178	0.00676627	0.00583706	0.00854121
IL-1 RI	0.00853891	0.00976288	0.00908602	0.00936723	0.0084135	0.00740421	0.00754679	0.00920741
IL-1 RII	0.00950556	0.00918827	0.00950123	0.00996059	0.00731827	0.00851616	0.0106667	0.00887495
IL-10	0.0138094	0.015218	0.0151297	0.0170645	0.0109922	0.0106564	0.0101647	0.0141981
IL-10 R alpha	0.00881571	0.0117557	0.0115619	0.0113535	0.00938113	0.00649287	0.00656334	0.0100674
IL-11	0.0086344	0.00992059	0.0087319	0.0088178	0.00821514	0.00691186	0.00701351	0.00942177
IL-12 p40/p70	0.00793114	0.0110301	0.00983577	0.00924247	0.00681087	0.00579647	0.00619072	0.00898406
IL-12 p70	0.00919604	0.0109256	0.0106336	0.0109124	0.0072832	0.00874257	0.00922137	0.00926068
IL-12 R beta 1	0.00767097	0.00860816	0.00800943	0.00730248	0.00669536	0.00565031	0.00563624	0.00783715
IL-13	0.0086741	0.0100808	0.0104218	0.0115614	0.0176646	0.0105744	0.0264497	0.00763818
IL-13 R alpha 2	0.00723378	0.00890647	0.0083855	0.00911887	0.00627505	0.00568585	0.00509292	0.0079148
IL-15	0.0100409	0.0154479	0.0143764	0.0143958	0.00826413	0.014652	0.00810349	0.0106451
IL-15 R alpha	0.011146	0.013474	0.0134238	0.0139782	0.0103409	0.00981382	0.0131362	0.0110552
IL-16	0.190406	0.00996155	0.00852548	0.00964077	0.00637181	0.0055116	0.0130051	0.00866636
IL-17	0.43741	0.00918644	0.00886773	0.00941702	0.00724268	0.00661954	0.00704307	0.00900396
IL-17BR	0.011588	0.0138163	0.0121443	0.0136625	0.0103234	0.00764265	0.0086033	0.0120359
IL-17C	0.00798103	0.0102537	0.00880367	0.0111801	0.00603919	0.00535054	0.00534673	0.00889357
IL-17D	0.00756744	0.0107122	0.00843532	0.0101504	0.00624663	0.00587729	0.00728126	0.00906814
IL-17E	0.0332003	0.0558992	0.0625896	0.0418468	0.0215696	0.0156602	0.0338905	0.0128908
IL-17F	0.00815268	0.0112043	0.00903204	0.0113453	0.00677398	0.00570304	0.00612434	0.00839552
IL-17R	0.0261146	0.028689	0.025389	0.0336768	0.00879874	0.00911283	0.0129538	0.0186279
IL-17RC	0.00770745	0.0103412	0.00898399	0.00884767	0.00641717	0.00560389	0.00520449	0.00925105
IL-17RD	0.00746498	0.00883923	0.00778225	0.00801943	0.00618192	0.00548409	0.0051872	0.00819913
IL-18 R alpha/IL-1 R5	0.007053	0.00843211	0.00782496	0.00787065	0.00638028	0.00546804	0.00549009	0.00788143
IL-2	0.00730995	0.0080366	0.00771285	0.00738917	0.00588982	0.00568298	0.00552022	0.00781853
IL-2 R alpha	0.00693499	0.00840277	0.00784631	0.00782555	0.00622848	0.00597931	0.00511412	0.00782816
IL-2 R beta	0.00939184	0.0097476	0.00854565	0.00917276	0.00755353	0.00734518	0.00695661	0.00948852
IL-20	0.00785872	0.00990103	0.00967087	0.010373	0.00780329	0.00754579	0.0064211	0.0101483
IL-20 R alpha	0.00754115	0.00900489	0.00858183	0.00959977	0.00702133	0.00621603	0.00585212	0.00825432
IL-21	0.00681053	0.00752312	0.00676973	0.00753971	0.00585111	0.00542047	0.00449047	0.0079501
IL-21 R	0.00699775	0.00799259	0.00693403	0.00736867	0.00627203	0.0052938	0.00539582	0.00829989
IL-22	0.00779649	0.00924206	0.00838134	0.0110278	0.00654296	0.00581195	0.00623032	0.00854699
IL-22BP	0.00851692	0.010733	0.0086192	0.00858819	0.00691489	0.00660063	0.00556875	0.0094789
IL-23	0.00714688	0.0101089	0.0079946	0.0101035	0.00619583	0.00528119	0.00547113	0.00877226
IL-23 R	0.00688885	0.0108993	0.00813993	0.0100004	0.00630892	0.00515051	0.00750941	0.00891539
IL-24	0.00647473	0.0095416	0.00766303	0.00812194	0.00625812	0.00475273	0.00489099	0.00841477
IL-27	0.00725523	0.0101242	0.00920643	0.00912883	0.00674495	0.00549212	0.00593691	0.00866316
IL-28 / IFN-lambda	0.00771388	0.0102861	0.00903738	0.0103267	0.0068526	0.00564573	0.00595811	0.00916505
IL-3	0.00861884	0.0109439	0.010423	0.0104292	0.00868141	0.00767303	0.0085213	0.00930817
IL-3 R alpha	0.0100688	0.00927446	0.00895789	0.0105879	0.00732734	0.00627335	0.00636532	0.00893336
IL-3 R beta	0.0188845	0.0233457	0.0186661	0.0219719	0.010757	0.00989406	0.00981099	0.0119345
IL-31	0.00769886	0.0113131	0.0093304	0.0102529	0.00722816	0.00553912	0.00537128	0.00914323
IL-31 RA	0.00721983	0.00777864	0.00742339	0.00810729	0.00611116	0.00553052	0.00753117	0.00852902
IL-4	0.00713078	0.00805494	0.00759185	0.00895076	0.00707999	0.00644071	0.00608083	0.00878125
IL-4 R	0.00754383	0.00932275	0.00808536	0.00859697	0.00759949	0.0058022	0.00612601	0.00851297
IL-5	0.00887526	0.0108039	0.00982806	0.011347	0.00958554	0.00843191	0.00843651	0.0112086
IL-5 R alpha	0.00654017	0.00818576	0.00706928	0.00811666	0.00592792	0.00456702	0.00444194	0.00712666
IL-6	0.00981294	0.0110032	0.0101235	0.0110887	0.00965388	0.00732454	0.00697279	0.0111495
IL-6 R	0.00721661	0.00824811	0.00784335	0.00845522	0.00620671	0.0051849	0.00496909	0.00724732
IL-7	0.0069441	0.00863995	0.00793054	0.00788237	0.00619462	0.00529036	0.00531605	0.00803354
IL-7 R alpha	0.00794616	0.00950981	0.00841397	0.00782965	0.00626477	0.00572081	0.00605182	0.00880564
IL-9	0.0126206	0.0143066	0.0148735	0.0140737	0.0114258	0.00919021	0.0106288	0.0123093
IL-9 R	0.0118117	0.0155292	0.0152246	0.0160318	0.00962122	0.00966824	0.00908973	0.0117053
Insulin	0.00757227	0.00939122	0.00967977	0.00895545	0.00651272	0.00578558	0.00656725	0.00826844
Integrin beta 2 / CD18	0.00835492	0.0107795	0.0101685	0.0117741	0.00604524	0.00949227	0.004756	0.00780634
KC	0.00741563	0.00853603	0.00749932	0.00868718	0.00618131	0.00559987	0.00511468	0.00779158
Kremen-1	0.00826104	0.00963818	0.0085498	0.00882893	0.00705762	0.00614381	0.00580973	0.0085579
Kremen-2	0.00726435	0.0091791	0.00808595	0.0104444	0.00686228	0.00554829	0.00578128	0.00828385
L-Selectin	0.0123867	0.0161704	0.0186341	0.0197829	0.0070425	0.009122	0.00549567	0.00888394
Lefty-1	0.00771388	0.0113577	0.00969163	0.0122186	0.00705822	0.00563426	0.00589005	0.00945066
Leptin R	0.00710879	0.0108791	0.00796317	0.0103091	0.00648672	0.00524107	0.00620243	0.00867599
LEPTIN(OB)	0.00679283	0.0137583	0.00806104	0.00917862	0.00613112	0.00485647	0.00508009	0.00838076
LIF	0.0098875	0.0148164	0.0125726	0.0148674	0.00930856	0.00800948	0.00865909	0.0125275
LIGHT / TNFSF14	0.00754115	0.0085886	0.00866843	0.00843062	0.00603435	0.00888414	0.0134921	0.00860539
LIX	0.00724397	0.010703	0.00886536	0.0107314	0.00660042	0.0051379	0.00576175	0.00854699
LRP-6	0.00982474	0.0135969	0.0119071	0.0122889	0.00847579	0.00721679	0.00705144	0.0108845
Lungkine	0.00748054	0.00871636	0.00898755	0.009089	0.00641657	0.00604293	0.00560445	0.00865738
Lymphotactin	0.00819077	0.0102201	0.0117511	0.0141024	0.00779846	0.00671068	0.00646405	0.0100835
Lymphotoxin beta R / TNFRSF3	0.00780883	0.00921517	0.00892527	0.00840954	0.00617406	0.00528578	0.00538745	0.00750469
M-CSF	0.00701706	0.0106138	0.00826153	0.00838435	0.00609362	0.00554313	0.00527254	0.00803418
MAdCAM-1	0.00743708	0.00922189	0.00991525	0.00813365	0.00630468	0.00572654	0.00504328	0.00817538
MCP-1	0.00859792	0.0104029	0.00946623	0.00977139	0.00870077	0.00857233	0.00809345	0.00966759
MCP-5	0.00714151	0.00946457	0.00759066	0.00991959	0.00632404	0.00548982	0.00547671	0.00797963
MDC	0.00830664	0.0125381	0.0131059	0.0130352	0.0065605	0.00553281	0.00591739	0.00910215
MFG-E8	0.0124747	0.0183863	0.0180848	0.0208976	0.00983712	0.00785301	0.00845994	0.0132104
MFRP	0.00689207	0.00878421	0.00777395	0.00870709	0.00597751	0.00494875	0.00519556	0.00877868
MIG	0.00715009	0.0095202	0.00877935	0.0110261	0.00606036	0.0047447	0.00498359	0.00833904
MIP-1 alpha	0.00758889	0.010137	0.00860141	0.00981884	0.00612628	0.00529839	0.00505053	0.00854891
MIP-1 gamma	0.00770047	0.0103161	0.00903263	0.0105938	0.0068901	0.00525425	0.0053233	0.00816254
MIP-2	0.00813069	0.0107764	0.0112137	0.0114062	0.00658106	0.00621546	0.00526752	0.00890319
MIP-3 alpha	0.00688939	0.00873164	0.00820636	0.00867664	0.00597146	0.00575635	0.00516209	0.00791801
MIP-3 beta	0.00728903	0.00918399	0.00780776	0.0100033	0.00815769	0.00513389	0.0048592	0.00744757
MMP-12	0.00704442	0.00911308	0.00828585	0.0100268	0.00642927	0.00545601	0.00532275	0.00834032
MMP-14 / LEM-2	0.00828036	0.00991632	0.00831313	0.00942873	0.00720941	0.00631977	0.0064172	0.00921511
MMP-2	0.067681	0.0444168	0.0624265	0.42455	0.00849938	0.00762087	0.0154149	0.0101335
MMP-24 / MT5-MMP	0.01379	0.0189414	0.0171263	0.0234497	0.0111634	0.00948081	0.0154813	0.0125859
MMP-3	0.00704334	0.00911614	0.0078819	0.00930104	0.00862215	0.00503072	0.00471862	0.00747581
MMP-9	0.00682126	0.00911553	0.0082639	0.0101451	0.00620974	0.00673475	0.00522234	0.00782816
Neuregulin-3 / NRG3	0.00695805	0.00856781	0.0082461	0.011528	0.00614019	0.0051207	0.00528426	0.00895903
Neurturin	0.00626659	0.00878788	0.00739077	0.00853781	0.00607729	0.00819003	0.00528705	0.00829411
NGF R / TNFRSF16	0.00680141	0.00927874	0.00856285	0.00840016	0.00599988	0.00494531	0.0052056	0.00875173
NOV / CCN3	0.0072091	0.00930075	0.00820162	0.0111684	0.00632162	0.00529495	0.00608362	0.00916954
Osteoactivin / GPNMB	0.0104245	0.0139239	0.0121894	0.0143045	0.00844193	0.00713769	0.00786754	0.0109981
Osteopontin	0.00773534	0.0102537	0.00869394	0.00956697	0.00704068	0.00536545	0.00526696	0.0081972
Osteoporotegerin	0.015542	0.0218059	0.0248854	0.0247055	0.00679938	0.00640288	0.0060719	0.00864775
OX40 Ligand / TNFSF4	0.00700526	0.00917971	0.00840507	0.0104503	0.00641294	0.00579991	0.00552189	0.00788721
P-Selectin	0.0733929	0.103322	0.123238	0.121295	0.0308793	0.019897	0.105548	0.0298333
PDGF C	0.00933659	0.0108883	0.0104669	0.0112129	0.00758376	0.00649803	0.00636364	0.0105032
PDGF R alpha	0.00694142	0.00832574	0.00749042	0.01203	0.00586925	0.00480087	0.00506447	0.00797128
PDGF R beta	0.00811943	0.0103302	0.00950953	0.0119222	0.00717313	0.00645218	0.00824072	0.0156794
Pentraxin3 / TSG-14	0.00763074	0.0100557	0.00880071	0.0113822	0.00673709	0.0056526	0.00573052	0.0082877
PF-4	0.00888599	0.0117068	0.0098678	0.014052	0.00709572	0.00606471	0.0068523	0.00870616
PlGF-2	0.00823476	0.0100447	0.00841634	0.0139068	0.00612628	0.00547721	0.00580192	0.00916313
Progranulin	0.00849922	0.0111964	0.010856	0.0119375	0.00662279	0.00549842	0.00670224	0.0122509
Prolactin	0.0154449	0.0302588	0.0206342	0.0244449	0.00885619	0.00815449	0.0133097	0.0118119
RAGE	0.0103097	0.0181559	0.0125726	0.0185078	0.00647946	0.00581882	0.00628164	0.00910344
RANTES	0.008415	0.0128548	0.0110939	0.0142395	0.00695178	0.00538895	0.0058577	0.00849179
RELM beta	0.00837101	0.0110606	0.010063	0.00923837	0.00702557	0.00616158	0.00596536	0.00865866
Resistin	0.0074682	0.0106395	0.00967918	0.00801064	0.00667299	0.0064774	0.00539024	0.00846484
S100A10	0.00693767	0.00849385	0.00762744	0.00897185	0.00645709	0.00527775	0.00472476	0.00734424
SCF	0.00655519	0.00843027	0.00786767	0.00826896	0.00572048	0.00464039	0.00455239	0.00875558
SCF R / c-kit	0.00804111	0.0105942	0.00972663	0.0133977	0.00620429	0.00510064	0.00559385	0.00742831
SDF-1	0.0117409	0.0178166	0.0141569	0.0291806	0.0134754	0.0286688	0.0424369	0.0142084
Serum Amyloid A1	0.00970029	0.0124134	0.0106241	0.0147104	0.00629501	0.00542678	0.00554532	0.00844045
Shh-N	0.00783243	0.0101358	0.00839143	0.0132946	0.0065732	0.00749821	0.00645178	0.00806178
SIGIRR	0.0148693	0.0166399	0.0163119	0.0197624	0.0116544	0.0112811	0.0108418	0.0138098
SLPI	0.0134076	0.0167658	0.0165984	0.0167822	0.00784744	0.00904405	0.00768457	0.010321
Soggy-1	0.00963699	0.0150933	0.0133022	0.0158503	0.00813592	0.00678977	0.0116261	0.0114878
SPARC	0.0173643	0.025303	0.0567428	0.0258032	0.0180244	0.0107005	0.0162683	0.0149105
Spinesin Ectodomain	0.00726596	0.00898532	0.00785521	0.00946915	0.00649337	0.00537806	0.00557711	0.00877676
TACI / TNFRSF13B	0.00726704	0.00895904	0.00825856	0.00945333	0.00635125	0.0053964	0.00491163	0.00836086
TARC	0.00813552	0.00894498	0.00773836	0.00937894	0.00646011	0.00538723	0.00522847	0.00837498
TCA-3	0.00818112	0.00958805	0.00907534	0.0096929	0.00655627	0.00847776	0.00835228	0.00852838
TCCR / WSX-1	0.00673436	0.00777925	0.00725909	0.00919912	0.00620792	0.00545314	0.00480564	0.00798155
TECK	0.00712113	0.00970542	0.00839855	0.0102915	0.00650365	0.00503759	0.00468181	0.00784934
TFPI	0.00719086	0.00942117	0.00924202	0.00823323	0.00591884	0.00508287	0.00646517	0.00758941
TGF-beta 1	0.00890315	0.0101119	0.00946208	0.0102271	0.00760735	0.00613579	0.00581475	0.00860924
TGF-beta 2	0.007664	0.0102861	0.0087408	0.0110343	0.00596723	0.00574087	0.00521007	0.00853158
TGF-beta 3	0.0184645	0.00919255	0.010923	0.0398851	0.00939988	0.0106879	0.0144872	0.0241212
TGF-beta RI / ALK-5	0.00765863	0.00920294	0.00814111	0.0100444	0.00612084	0.00484558	0.00498471	0.00865995
TGF-beta RII	0.00734321	0.0124061	0.0127494	0.0132513	0.00613596	0.00502957	0.00583148	0.00833455
Thrombospondin	0.14355	0.212503	0.308433	0.194109	0.0059007	0.0073767	0.00696275	0.0102895
Thymus Chemokine-1	0.00824334	0.0105655	0.0100618	0.0114572	0.00699049	0.00557523	0.00569537	0.00908226
Tie-2	0.00718174	0.00939428	0.00836058	0.0106898	0.00616861	0.00572482	0.00655944	0.00874659
TIMP-1	0.00707768	0.00821327	0.00831194	0.00895838	0.00593154	0.00566006	0.00531828	0.00903027
TIMP-2	0.0100318	0.0106853	0.0118495	0.0109224	0.00812019	0.00924122	0.0101702	0.00905594
TIMP-4	0.00724558	0.00786789	0.00804917	0.00792161	0.00652845	0.00512643	0.00503881	0.00821581
TL1A / TNFSF15	0.00634169	0.00785138	0.00699988	0.00678234	0.0051012	0.00437902	0.0209853	0.00715747
TLR1	0.00726757	0.00977266	0.00847506	0.00870827	0.00643652	0.00552192	0.00567139	0.00787565
TLR2	0.0102276	0.0122673	0.0108305	0.0124406	0.00817825	0.00682531	0.00814031	0.0102709
TLR3	0.00740114	0.00998661	0.00887129	0.0118537	0.00627626	0.00508861	0.00477329	0.00821646
TLR4	0.00799122	0.0102024	0.00895315	0.0109751	0.00675221	0.00604007	0.00625598	0.00889036
TMEFF1 / Tomoregulin-1	0.00734589	0.00885879	0.00862691	0.00860752	0.00631376	0.0054904	0.00531438	0.00823507
TNF RI / TNFRSF1A	0.00683521	0.00814113	0.00789555	0.00841247	0.0057362	0.0050972	0.00481513	0.0080483
TNF RII	0.00728098	0.0103479	0.0108655	0.0112258	0.00594062	0.00471834	0.00479616	0.00829604
TNF-alpha	0.0083399	0.0109463	0.00966079	0.00958454	0.00736968	0.00711132	0.00645234	0.00892566
TNF-beta / TNFSF1B	0.0102051	0.0141134	0.0131403	0.014308	0.00842016	0.00754521	0.0107437	0.0119133
TPO	0.00774017	0.0102745	0.0221907	0.0107537	0.00660525	0.00562337	0.0058114	0.018581
TRAIL / TNFSF10	0.0101664	0.0118834	0.0103115	0.011309	0.0108858	0.00702821	0.0065388	0.0119479
TRAIL R2 / TNFRSF10B	0.0108193	0.014916	0.0137423	0.0163317	0.00909145	0.00747185	0.00747483	0.0112484
TRANCE / TNFSF11	0.00905872	0.0105747	0.00957004	0.0105662	0.00820849	0.0076587	0.00782235	0.008977
TREM-1	0.00681161	0.008069	0.00718494	0.00825021	0.00634702	0.00591626	0.00518831	0.00827614
TROY	0.00725041	0.00900305	0.0111686	0.00841364	0.0062436	0.00559013	0.00514369	0.00833968
TSLP	0.00712327	0.00899572	0.00797384	0.00982762	0.00566182	0.00541474	0.00489322	0.00778901
TSLP R	0.00728152	0.00949208	0.00836355	0.00988913	0.00628352	0.00525884	0.005822	0.00786924
TWEAK / TNFSF12	0.00792095	0.00937838	0.00822534	0.0094012	0.00727836	0.0058492	0.00604066	0.00871643
TWEAK R / TNFRSF12	0.00742797	0.00976472	0.00854446	0.008522	0.00667662	0.00587614	0.00541925	0.00851426
Ubiqultin	0.00779971	0.00952631	0.00903382	0.0107039	0.00631436	0.00537576	0.00533669	0.00972343
uPAR	0.00770262	0.0127123	0.0336292	0.01135	0.0066621	0.00634901	0.0054728	0.0094789
Urokinase	0.00666087	0.0111364	0.00830839	0.00986921	0.00622909	0.00500148	0.00557377	0.00972214
VCAM-1	0.0201269	0.0377807	0.0397945	0.0430306	0.0120748	0.00967855	0.0182748	0.0165825
VE-Cadherin	0.00948679	0.0127423	0.0110956	0.0127101	0.0082478	0.00669348	0.00690306	0.0113087
VEGF	0.00710718	0.00957827	0.00857293	0.00799424	0.006269	0.00517057	0.0048274	0.00883452
VEGF R1	0.00769189	0.00911981	0.00785818	0.0105364	0.0060531	0.00552823	0.00515819	0.00840386
VEGF R2	0.00734267	0.0098069	0.009573	0.0104473	0.00606459	0.00512242	0.00503045	0.00821966
VEGF R3	0.00759104	0.0114189	0.0101258	0.0120277	0.00616982	0.00495219	0.0118342	0.00830759
VEGF-B	0.00748697	0.00999334	0.00859903	0.00897712	0.00602286	0.00500893	0.0055548	0.00800658
VEGF-D	0.00801804	0.00903912	0.00883155	0.0098165	0.00657985	0.00565089	0.00486979	0.00891025
VEGFC	0.00949001	0.0116891	0.0102955	0.011569	0.00588014	0.00538321	0.00490215	0.0081388
WIF-1	0.014054	0.0149356	0.0135525	0.0193741	0.00755776	0.00603262	0.00297933	0.00848473
WISP-1 / CCN4	0.00802931	0.0105869	0.00884342	0.0104239	0.00668145	0.00568069	0.00537184	0.00900075

## Sheet: AHA, Old+Alk5OT
Normalized BONCAT Array Data of Serum Samples
Legend: YC - Young Control OC - Old Control OA - Old Alk5i+OT Treated OE - Old Treadmill OEA - Old Treadmill Alk5i+OT Treated M: male, F: Female
ID	OA1_F	OA2_F	OA3_M	OA4_M	YC1_F	YC2_F	YC3_M	YC4_M	OC1_F	OC2_F	OC3_M	OC4_M
6Ckine	0.00711905	0.00728801	0.00898966	0.00726961	0.00867521	0.00757813	0.00827192	0.00745679	0.00777336	0.00651837	0.00699178	0.00765474
Activin A	0.00644081	0.00704118	0.0109357	0.00774514	0.00759781	0.00692702	0.00772992	0.00633509	0.00835916	0.00694821	0.00783418	0.00734739
Activin C	0.00660471	0.00721339	0.0120366	0.00826869	0.00784725	0.00694477	0.00698131	0.00669278	0.0126485	0.00706468	0.00736079	0.00784001
Activin RIB / ALK-4	0.00667563	0.00714259	0.00932433	0.00722846	0.00653196	0.00578842	0.00706297	0.00608638	0.00714702	0.00671527	0.00728433	0.00741482
Adiponectin / Acrp30	0.00640386	0.00702715	0.0122665	0.00820582	0.00805877	0.00806673	0.0100157	0.0102557	0.00696737	0.00630602	0.00653169	0.00755395
AgRP	0.01384	0.0161271	0.0176952	0.0142637	0.0136166	0.012493	0.0165663	0.0144083	0.0348599	0.032754	0.0283135	0.0429195
ALCAM	0.00616785	0.00705266	0.0119403	0.00817209	0.00779231	0.00672459	0.00864567	0.0078061	0.00687439	0.00627707	0.00669259	0.00735023
Angiopoietin-like 2	0.0063544	0.00668976	0.0105733	0.00771314	0.00770165	0.00716994	0.00836125	0.00750038	0.00666188	0.00663098	0.00690469	0.00680721
Angiopoietin-like 3	0.00676384	0.0074296	0.0106552	0.00906772	0.00838127	0.00766409	0.00902217	0.0078782	0.00748466	0.00902662	0.00853495	0.00774773
AR (Amphiregulin)	0.00643009	0.00730268	0.0114172	0.00980217	0.0077934	0.00777224	0.0106767	0.00941963	0.00690725	0.0068105	0.00792925	0.00734952
Artemin	0.00947974	0.00949794	0.0102681	0.0882447	0.0101636	0.00967343	0.0112208	0.00961245	0.00879606	0.00938053	0.00913799	0.0105558
Axl	0.00558081	0.00552133	0.00898725	0.0064077	0.00656547	0.00602301	0.00764607	0.00586729	0.00563149	0.00551455	0.00569063	0.00635293
b FGF	0.0158532	0.0158758	0.0187684	0.0162304	0.0140523	0.0152932	0.0158692	0.0132693	0.0168763	0.0138482	0.0149357	0.0215822
B7-1/CD80	0.0253496	0.0193709	0.019749	0.0178394	0.0192865	0.0185948	0.0188631	0.0159609	0.022131	0.017606	0.018139	0.0232758
BAFF R / TNFRSF13C	0.0255529	0.0309085	0.0306016	0.0273066	0.0389187	0.0369778	0.0330186	0.0327697	0.0402139	0.0295289	0.030487	0.0401398
BCMA / TNFRSF17	0.00643962	0.00753611	0.00938211	0.00793033	0.00921308	0.0279405	0.00977296	0.00861147	0.0074525	0.00720753	0.00697649	0.00769875
beta-Catenin	0.00784913	0.00822364	0.0108646	0.00866363	0.00926418	0.00909275	0.0115179	0.00917316	0.00855909	0.0076187	0.00797579	0.00913473
BLC	0.00858577	0.0134484	0.0143064	0.0106023	0.00969602	0.00922919	0.0105029	0.00895575	0.00969503	0.00946869	0.00940061	0.0106388
BTC (Betacellulin)	0.00665001	0.00747488	0.00891382	0.0070587	0.00785384	0.00781605	0.00940524	0.00909827	0.00697226	0.00810324	0.00774109	0.00732751
Cardiotrophin-1	0.00640088	0.00696975	0.0101189	0.00744279	0.0068594	0.00614447	0.00683006	0.00604614	0.00693102	0.00696687	0.00695256	0.00726789
CCL1 / I-309 / TCA-3	0.00609335	0.00639447	0.0108646	0.00808007	0.00669458	0.00649942	0.00640205	0.00527095	0.00627042	0.00656985	0.00678767	0.0144627
CCL28	0.00613209	0.00726887	0.00783458	0.00888825	0.00772912	0.00654157	0.00685801	0.00659777	0.00673738	0.0065203	0.00662611	0.00692433
CCL4 / MIP-1 beta	0.00645095	0.00709858	0.0110253	0.00970901	0.00749233	0.00696917	0.0083174	0.0083745	0.00670872	0.0068401	0.00705162	0.00734455
CCL7 / MCP-3 / MARC	0.00677278	0.00726632	0.0109206	0.00938322	0.00791757	0.00792365	0.00959485	0.00812635	0.00720015	0.00657499	0.00716931	0.00737791
CCL8 / MCP-2	0.00662736	0.0068862	0.00951152	0.00728904	0.00724454	0.00713056	0.00877884	0.00659944	0.00716869	0.00722361	0.00762474	0.00764481
CCR10	0.00780324	0.00812606	0.0107575	0.00837385	0.00885047	0.00852317	0.00983215	0.00776306	0.00828436	0.00808844	0.00852764	0.011338
CCR3	0.00680377	0.00672037	0.010787	0.00905515	0.00755056	0.00821814	0.0101659	0.00693869	0.0691039	0.00945839	0.00793723	0.123691
CCR4	0.0102915	0.0111307	0.0143594	0.0126171	0.0125244	0.0129323	0.015502	0.0131816	0.0120599	0.0111192	0.0112869	0.0121621
CCR6	0.0188427	0.0113647	0.00967464	0.015073	0.013198	0.025478	0.0144624	0.0149868	0.0122011	0.0113759	0.0184927	0.069995
CCR7	0.00664941	0.00741748	0.0114184	0.00812465	0.00967184	0.00866238	0.00983982	0.00839294	0.00800195	0.00773582	0.0081952	0.00813387
CCR9	0.00957033	0.0103628	0.0133566	0.0105892	0.0111311	0.0108154	0.0136113	0.0105229	0.0104521	0.00985284	0.0104212	0.0153421
CD11b	0.00710832	0.00772489	0.010914	0.00818924	0.00883069	0.00843277	0.0107375	0.00852428	0.00867303	0.00889149	0.00899371	0.0613906
CD14	0.00689376	0.00796342	0.00951875	0.00761197	0.00807196	0.00794528	0.00972364	0.00941572	0.00814945	0.00812254	0.00756424	0.0092192
CD27 / TNFRSF7	0.00643903	0.00697103	0.00954764	0.00787431	0.00697478	0.00677118	0.00706626	0.00755068	0.00729312	0.00662711	0.0065543	0.00813245
CD27 Ligand / TNFSF7	0.007066	0.00754631	0.00921116	0.00798462	0.00826315	0.00689097	0.00780226	0.00693925	0.00747697	0.00704408	0.00673381	0.00847459
CD30	0.00669113	0.00728801	0.0105709	0.00875679	0.00742145	0.00678227	0.00757428	0.00751268	0.00709809	0.00652159	0.00693195	0.00711102
CD30 L	0.00861974	0.0095968	0.0142956	0.0120152	0.00978942	0.00931515	0.0110214	0.0117078	0.00930916	0.00843141	0.00907682	0.0100334
CD40	0.0271722	0.0303683	0.0267559	0.0229022	0.0193025	0.0204106	0.0157804	0.0160235	0.142931	0.0328319	0.0345261	0.143769
CD40 Ligand / TNFSF5	0.00701654	0.00712792	0.0101881	0.00738106	0.00774561	0.00816379	0.00868568	0.00912174	0.00713863	0.00770364	0.00764336	0.0192249
Cerberus 1	0.00661246	0.00697677	0.00930386	0.00745708	0.0079868	0.00772232	0.00881118	0.0100255	0.00668425	0.00773389	0.00707024	0.00711741
Chordin-Like 2	0.00682463	0.00669486	0.00723567	0.00639627	0.00762199	0.00725535	0.00794529	0.00836667	0.00670383	0.00668245	0.00645856	0.00690446
Coagulation Factor III / Tissue Factor	0.0066059	0.00820451	0.0097872	0.00724732	0.00755001	0.00664583	0.00741371	0.00708959	0.00696946	0.00626098	0.00682158	0.00720188
Common gamma Chain / IL-2 R gamma	0.0070219	0.00743215	0.0105853	0.00781887	0.00928945	0.00831242	0.00992696	0.00886688	0.00778035	0.00714318	0.00721784	0.0115787
CRG-2	0.00821804	0.00899664	0.0106847	0.00886653	0.0111278	0.0108608	0.0111184	0.00998244	0.010924	0.00945968	0.0115176	0.0106239
Cripto	0.0120651	0.0149415	0.0130039	0.0108447	0.0153088	0.0151917	0.0151836	0.0168384	0.0345635	0.0194161	0.0186629	0.0893903
Crossveinless-2	0.00955424	0.00834227	0.0117675	0.00964613	0.0100641	0.0105597	0.010943	0.00909212	0.00953915	0.00969776	0.0109105	0.00928876
CRP	0.00625367	0.00694807	0.0115292	0.00774171	0.00756979	0.00727143	0.00832508	0.00722652	0.00700232	0.0065203	0.00652837	0.00812039
Cryptic	0.00663689	0.00716938	0.0100707	0.00779258	0.00731432	0.00687433	0.00975652	0.0092257	0.0069401	0.00666637	0.00810877	0.00759086
Csk	0.00621434	0.00675545	0.0114473	0.00794862	0.00857027	0.00852539	0.0102596	0.00854328	0.00910714	0.00701255	0.00702237	0.0117412
CTACK	0.0153442	0.0134478	0.020898	0.012333	0.0254487	0.028423	0.0278748	0.0211034	0.0272718	0.1919	0.165624	0.0982269
CTLA-4 / CD152	0.00649624	0.00717703	0.0106106	0.00971872	0.00705335	0.0066059	0.00786693	0.00908877	0.00718407	0.00663741	0.00694458	0.00704713
CXCL14 / BRAK	0.00692058	0.00738304	0.00992805	0.00895913	0.00851533	0.00626926	0.00661249	0.00779045	0.00737631	0.00677897	0.00763671	0.00725227
CXCL16	0.00701892	0.00710305	0.00743129	0.00745422	0.00792581	0.00811998	0.0101407	0.00851813	0.00787752	0.00733172	0.00743459	0.00707979
CXCR2 / IL-8 RB	0.00674655	0.0149734	0.00915157	0.00830469	0.00769121	0.00713001	0.0081234	0.00709854	0.00773352	0.0066831	0.00683222	0.00757737
CXCR3	0.00820076	0.00817772	0.00865559	0.00775829	0.008406	0.00846549	0.00886488	0.00961525	0.00804669	0.00791341	0.0083182	0.0119762
CXCR4	0.00824486	0.00815859	0.0125831	0.00950325	0.00993062	0.00934898	0.0104421	0.0100814	0.0625686	0.00819719	0.0085416	0.0584114
CXCR6	0.00874311	0.00897113	0.0139441	0.0101045	0.0123546	0.0115258	0.0119667	0.0104888	0.265344	0.0119493	0.0113021	0.0200327
DAN	0.00742061	0.00799914	0.0134866	0.00921461	0.00932297	0.00876997	0.0109934	0.00960854	0.007456	0.00738577	0.00771384	0.00849092
Decorin	0.00898686	0.00886526	0.0159424	0.0110767	0.00996852	0.00972778	0.0135944	0.0105849	0.0128428	0.00917269	0.00977228	0.0166042
DKK-1	0.00668815	0.00694615	0.0113835	0.0080755	0.00632098	0.00663585	0.00727506	0.00745623	0.00686461	0.00852021	0.00674179	0.00761286
Dkk-3	0.00653856	0.00715598	0.0110272	0.0083367	0.00747694	0.00739622	0.008929	0.00926482	0.00724139	0.00689673	0.00704099	0.00811968
Dkk-4	0.00628526	0.00665468	0.0114822	0.00798862	0.00766814	0.00789314	0.00847085	0.00913571	0.00713653	0.00664964	0.00738805	0.0133007
DPPIV / CD26	0.00785092	0.00920456	0.0106437	0.00845959	0.00905485	0.00826806	0.0103528	0.0092514	0.0119166	0.00916497	0.00995512	0.0102676
DR3 / TNFRSF25	0.00669232	0.00698952	0.00656152	0.00912716	0.00617044	0.00846161	0.00627655	0.00848069	0.00663252	0.00621143	0.00682025	0.00731971
Dtk	0.00931644	0.00964782	0.0123773	0.0121204	0.0099927	0.00965512	0.0107671	0.0126931	0.0311745	0.0338331	3.50044	0.064391
E-Selectin	0.00670782	0.00699781	0.0103921	0.0079309	0.00746595	0.00707565	0.00847907	0.00882832	0.00741685	0.00683367	0.00692197	0.00759299
EDAR	0.00746233	0.00807057	0.0103337	0.00918089	0.00773242	0.00640292	0.00733644	0.00928494	0.00753359	0.00690574	0.00789933	0.00774631
EG-VEGF / PK1	0.00838194	0.00859675	0.00896077	0.00803092	0.0079401	0.0085143	0.0091652	0.00742381	0.00743433	0.00831108	0.00834879	0.00804515
EGF R	0.0120109	0.0131856	0.0167364	0.018056	0.0152594	0.0161202	0.0178125	0.0179378	0.00909036	0.00883808	0.0115402	0.00967348
Endocan	0.00733062	0.00751187	0.00858637	0.00803778	0.0075665	0.00731247	0.0081782	0.00689119	0.0075259	0.00736582	0.00760014	0.00740843
Endoglin / CD105	0.00672212	0.00733903	0.00968307	0.00771371	0.00835655	0.00912048	0.00847743	0.00854272	0.00742594	0.00707175	0.00773112	0.00793441
Endostatin	0.00920142	0.00935572	0.0119433	0.00893512	0.00925429	0.00858141	0.0092359	0.00965269	0.00815155	0.00979686	0.0123354	0.013684
Eotaxin-2	0.00764768	0.00685559	0.0102814	0.00758111	0.0071874	0.00735129	0.00823356	0.00791844	0.00719176	0.00651322	0.00683621	0.00770372
Eotaxin	0.00713216	0.00659792	0.00814878	0.00724389	0.0074242	0.00679225	0.00751235	0.0067917	0.00660316	0.0062243	0.00644726	0.00704216
Epigen	0.00680019	0.00710751	0.0119451	0.00823782	0.00689786	0.00864851	0.00767347	0.00728689	0.00731619	0.00688193	0.00710415	0.00787479
Epiregulin	0.00623103	0.00768981	0.0115809	0.00818581	0.0080346	0.00794084	0.00933728	0.00910833	0.00713304	0.00663741	0.00730826	0.00753265
Erythropoietin (EPO)	0.00647419	0.00696146	0.0101935	0.00730733	0.00743244	0.00683496	0.00724601	0.00909994	0.00715331	0.00667087	0.00728499	0.00746593
FADD	0.00668159	0.0071005	0.0120625	0.0099462	0.0082681	0.00767185	0.00927864	0.00951688	0.00827877	0.0072841	0.00904823	0.0081793
FAM3B	0.00704812	0.0074009	0.0115472	0.00944552	0.00877355	0.00825364	0.0106695	0.0118693	0.00709669	0.00681372	0.00712609	0.00736017
Fas / TNFRSF6	8.07809	8.96451	9.07063	9.41789	6.44886	4.58327	6.10885	0.0174851	11.4334	3.81852	3.54387	12.1251
Fas Ligand	0.0075565	0.028791	0.00943628	0.00869678	0.00829282	0.0077739	0.0089153	0.00818112	0.0081823	0.00730212	0.00809281	0.00828578
FCrRIIB / CD32b	0.00933492	0.0101855	0.0144617	0.0100188	0.0109053	0.0134115	0.0119689	0.0114607	0.0101781	0.0136403	0.0113095	0.0104578
FGF R3	0.0101961	0.010565	0.0180401	0.0121044	0.0127595	0.0141491	0.014834	0.0133699	0.0110959	0.0107344	0.0109185	0.011096
FGF R4	0.00776927	0.00753356	0.00853521	0.00762169	0.00785769	0.00715053	0.00804613	0.0080481	0.00735883	0.00741344	0.0072963	0.00779032
FGF R5 beta	0.00817275	0.00917714	0.0104301	0.00846587	0.0105119	0.0103101	0.00944195	0.00991034	0.00846332	0.00943651	0.0104844	0.00844904
FGF-21	0.00667206	0.00665341	0.0107406	0.00792575	0.00809283	0.00702019	0.00816012	0.00760601	0.0067947	0.00657499	0.00667464	0.00709256
Fit-3 Ligand	0.00779489	0.00660812	0.00848585	0.0120587	0.00633142	0.00625817	0.0070964	0.00639321	0.00679121	0.00660652	0.00692131	0.00750284
FLRG (Follistatin)	0.00821447	0.00870517	0.0126584	0.00966957	0.00903507	0.00886204	0.0114302	0.0105357	0.0105052	0.0078658	0.007898	0.0161655
Follistatin-like 1	0.00674596	0.00701886	0.00889576	0.00749023	0.00709126	0.00674289	0.00826753	0.00843933	0.00698135	0.00885674	0.00725308	0.00896508
Fractalkine	0.00819897	0.00873323	0.0143708	0.0103051	0.0100652	0.00940278	0.0124238	0.0110119	0.00911832	0.0085408	0.00927163	0.0137862
Frizzled-1	0.0200621	0.0116977	0.016247	0.0151153	0.013287	0.0117876	0.0156456	0.0165858	0.0113881	0.0111745	0.0118985	0.0121735
Frizzled-6	0.00755173	0.00789199	0.00893729	0.00948839	0.00774396	0.00725091	0.00894709	0.0109527	0.00706244	0.00736904	0.00806356	0.00694705
Frizzled-7	0.00725493	0.00736964	0.00968608	0.0100954	0.00874828	0.00728197	0.00963815	0.0104497	0.00717918	0.00663419	0.00713141	0.00739637
G-CSF	0.00679006	0.00692447	0.00769975	0.0359582	0.00781593	0.00763747	0.00698022	0.00842536	0.00703238	0.00673715	0.00808084	0.00747658
Galectin-3	0.00695396	0.00737411	0.0118488	0.00992791	0.00842688	0.00819263	0.010789	0.00968678	0.0075273	0.00720302	0.0078734	0.00763771
GDF-1	0.0138394	0.0145352	0.0154314	0.0123513	0.0144682	0.013635	0.0149946	0.0138265	0.0135831	0.0141197	0.0111685	0.0132176
GDF-3	0.0074826	0.00788561	0.00867666	0.00766684	0.00800328	0.00779276	0.00856402	0.00968064	0.00705125	0.00708655	0.00720654	0.00745812
GDF-5	0.00748617	0.00799276	0.00968608	0.00762226	0.00892849	0.00952812	0.00853168	0.00859023	0.00735883	0.00649456	0.00659619	0.0110427
GDF-8	0.0105168	0.0107627	0.0112089	0.00977359	0.0112838	0.00975329	0.0117628	0.0112813	0.00895824	0.00882972	0.00869585	0.00911627
GDF-9	0.00702667	0.00700036	0.0091895	0.00757653	0.00764067	0.00646781	0.00671168	0.00624566	0.00703517	0.00652094	0.00658222	0.00724234
GFR alpha-2 / GDNF R alpha-2	0.00714289	0.00697485	0.0114828	0.00805893	0.00732256	0.00659204	0.00726355	0.00748976	0.007233	0.00652738	0.00662012	0.00737862
GFR alpha-3 / GDNF R alpha-3	0.00656478	0.00687344	0.010781	0.00783088	0.00649789	0.00594426	0.00698186	0.00579016	0.00683035	0.00657757	0.00748844	0.00743115
GFR alpha-4 / GDNF R alpha-4	0.00891594	0.0100069	0.0110452	0.00980446	0.00861148	0.0088088	0.0109671	0.00960183	0.00974816	0.0100002	0.0106778	0.00891042
GITR	0.00629957	0.00669295	0.011218	0.00877051	0.00689896	0.00600748	0.00757483	0.0060534	0.00685482	0.00610912	0.00683155	0.00712734
GITR Ligand / TNFSF18	0.00679662	0.00691809	0.00915699	0.00930034	0.00790164	0.0069725	0.0097768	0.00684033	0.00689257	0.00640962	0.00731624	0.00716284
Glut2	0.00679304	0.00764581	0.00889215	0.0103263	0.00799724	0.00728807	0.00877007	0.0069672	0.00693801	0.00630731	0.00743858	0.00699461
GM-CSF	0.00673642	0.00718213	0.0123357	0.0102337	0.00793845	0.0071716	0.0143649	0.00883	0.00714073	0.00647268	0.00700708	0.00714864
Granzyme B	0.00856371	0.00896475	0.0123363	0.0120844	0.00993776	0.00995683	0.0120089	0.00961636	0.0222506	0.411721	0.68744	0.0272594
Granzyme D	0.00731751	0.00721721	0.00935863	0.00784059	0.00856807	0.00919868	0.0104185	0.00761328	0.00750773	0.00790505	0.00881752	0.00801604
Granzyme G	0.00907805	0.00939653	0.0145989	0.0108784	0.0108998	0.0117682	0.0111244	0.0109991	0.0104102	0.010569	0.0110242	0.0116298
Gremlin	0.00689972	0.00735179	0.00760284	0.00707357	0.00797141	0.00779609	0.00802585	0.00761999	0.00701071	0.00657113	0.00707888	0.00709114
Growth Hormone R	0.00659875	0.00674844	0.00693651	0.00889911	0.00641163	0.00597809	0.00676649	0.00633397	0.0066521	0.00640061	0.00665735	0.00701803
HGF R	0.00635022	0.00694998	0.00762631	0.00708157	0.0077489	0.00698414	0.00672319	0.00764458	0.00670383	0.00791856	0.00828031	0.00718129
HGF	0.00674059	0.00697613	0.00980165	0.00725932	0.00793735	0.0067684	0.00695884	0.00896525	0.0067982	0.00662647	0.00682623	0.00688387
HVEM / TNFRSF14	0.00706124	0.00767068	0.0075613	0.00674606	0.00795933	0.00754873	0.00889776	0.0080671	0.00711347	0.00676932	0.00667797	0.00754188
I-TAC	0.00687529	0.00747105	0.0104487	0.00748623	0.00879938	0.00821481	0.00913013	0.00911	0.0076727	0.007102	0.00731159	0.00762209
ICAM-1	0.00674179	0.00692064	0.0119096	0.00875965	0.00764232	0.00740564	0.00965185	0.00808499	0.00754687	0.00699261	0.00788205	0.00799901
ICAM-2 / CD102	0.00675013	0.00714195	0.00976132	0.00836871	0.00719839	0.00665915	0.00919205	0.00772394	0.00703517	0.00704537	0.00920248	0.00785207
ICAM-5	0.00671318	0.00729502	0.00955426	0.00917403	0.00778242	0.00776447	0.00888187	0.00751212	0.00736932	0.00724485	0.00729297	0.00780877
ICK	0.00739916	0.00659664	0.00834139	0.00799148	0.00662371	0.00616333	0.00654015	0.00703035	0.00576711	0.00574363	0.00621787	0.00624077
IFN-alpha / beta R1	0.00632102	0.00697294	0.0106871	0.00904886	0.00706214	0.0064251	0.00752989	0.0062138	0.00660876	0.00647075	0.00679964	0.00694918
IFN-alpha / beta R2	0.00819182	0.00902853	0.0118301	0.0113357	0.00960976	0.00890419	0.0109129	0.0111433	0.0128694	0.0227396	0.0173671	0.0236421
IFN-beta	0.00681688	0.00699016	0.0116664	0.0106835	0.00795988	0.00750048	0.00896846	0.00985222	0.00760839	0.00735552	0.00699777	0.00722175
IFN-gamma	0.0088331	0.00855147	0.0163854	0.0104743	0.0113179	0.0183291	0.013345	0.011397	0.00947344	0.0129872	0.0134357	0.00921139
IFN-gamma R1	0.00786582	0.00816305	0.00896257	0.00851903	0.00839171	0.00914932	0.00825602	0.00786814	0.0135726	0.0128984	0.0106592	0.0236854
IGF-I	0.00966212	0.0107499	0.0111764	0.0107361	0.00921473	0.00961297	0.0125712	0.011179	0.00921479	0.00895841	0.00992453	0.00995173
IGF-II	0.0130247	0.0106676	0.0119643	0.0308668	0.0126403	0.0230366	0.0129499	0.0126165	0.021102	0.0113888	0.0319278	0.0637067
IGFBP-1	0.0106926	0.0108724	0.0136028	0.0116529	0.0131612	0.0118935	0.0134513	0.0118525	0.0373499	0.0131474	0.0128679	0.0384114
IGFBP-2	0.00800051	0.00734477	0.0134565	0.00882252	0.00842797	0.00829246	0.010081	0.00762837	0.00770276	0.00768048	0.00716	0.00791525
IGFBP-3	0.00643366	0.00737347	0.00830528	0.00701469	0.00782747	0.00711448	0.00777486	0.00713934	0.0135384	0.00822099	0.00899371	0.0133142
IGFBP-5	0.00643783	0.00652713	0.00973182	0.00748623	0.00745057	0.0067867	0.00727506	0.00663074	0.0067996	0.00667409	0.00733486	0.00717703
IGFBP-6	0.00701475	0.00803549	0.00916963	0.00721988	0.00873345	0.00796968	0.00973186	0.00883503	0.00820537	0.00822035	0.00867856	0.00861372
IGFBP-rp1 / IGFBP-7	0.00646048	0.0069385	0.0104451	0.00838643	0.00884003	0.00718935	0.0106246	0.00792738	0.00701001	0.00654025	0.00693993	0.00741553
IL-1 alpha	0.00790157	0.00758266	0.00952898	0.00826469	0.00753188	0.00722983	0.0093192	0.00946658	0.44911	0.238892	0.299646	0.564732
IL-1 beta	0.00644201	0.00670507	0.0117206	0.00959355	0.00649075	0.00624153	0.00678457	0.00774742	0.00687369	0.00637101	0.00684019	0.00736017
IL-1 R4 / ST2	0.0057745	0.00611129	0.00915699	0.008375	0.00608528	0.0059548	0.00735288	0.00558505	0.00595236	0.00551198	0.00716931	0.0101569
IL-1 R6 / IL-1 R rp2	0.00735863	0.00767196	0.0121564	0.0106172	0.00917737	0.00818819	0.0115277	0.00956998	0.0080383	0.00904464	0.0096752	0.00828507
IL-1 R9	0.00698972	0.00704373	0.00926353	0.00758568	0.00724894	0.00937006	0.00843249	0.00835605	0.00909875	0.00706918	0.00796516	0.00728421
IL-1 RI	0.00668934	0.0072204	0.0113955	0.00782059	0.00860818	0.0108464	0.00897887	0.0084561	0.00771255	0.00745591	0.00786077	0.0086414
IL-1 RII	0.0065022	0.0067006	0.0122376	0.00775143	0.00852797	0.00759809	0.00906546	0.00901108	0.00711696	0.00655183	0.00649047	0.00704075
IL-10	0.00954471	0.0110235	0.0143275	0.0133538	0.0103169	0.0111198	0.0138892	0.0126322	0.0349801	0.0117517	0.0156198	0.0334462
IL-10 R alpha	0.00703322	0.00767323	0.0113889	0.00972787	0.00914551	0.00902343	0.0119075	0.0101138	0.00750773	0.00719659	0.00773777	0.00826874
IL-11	0.00666312	0.00707562	0.0115039	0.0136042	0.00829886	0.0078521	0.0101412	0.00874393	0.00716659	0.00657242	0.00718327	0.00712167
IL-12 p40/p70	0.00693548	0.00708774	0.0119667	0.00899628	0.00819118	0.00753709	0.00934605	0.0100814	0.00690655	0.00674744	0.00663741	0.00692008
IL-12 p70	0.00805236	0.0087428	0.0123153	0.0167786	0.00848127	0.00796025	0.011331	0.00980583	0.00863109	0.00968875	0.0101898	0.00889268
IL-12 R beta 1	0.00662199	0.00704565	0.00893067	0.0425254	0.00720224	0.00745334	0.00765539	0.00719131	0.00672969	0.00664642	0.00756291	0.00707837
IL-13	0.00815725	0.0123571	0.00773887	0.00756396	0.0070061	0.00725424	0.00830809	0.00656088	0.00671082	0.00628929	0.00689737	0.00702939
IL-13 R alpha 2	0.00676384	0.00676119	0.0090017	0.00685923	0.00734069	0.00847714	0.00806038	0.00766358	0.00665979	0.00654153	0.00677038	0.00693356
IL-15	0.0104065	0.011086	0.0158714	0.0109681	0.0130958	0.0120477	0.0139002	0.0150986	0.0115538	0.0105755	0.0107204	0.0193668
IL-15 R alpha	0.0101759	0.0109751	0.0118578	0.00952954	0.0110421	0.009405	0.0120758	0.0101887	0.144499	0.184887	0.122478	0.347016
IL-16	0.00633294	0.00669614	0.0114684	0.00706556	0.00718575	0.00643231	0.00770855	0.00572421	0.00695548	0.0064019	0.00660749	0.00687536
IL-17	0.00664941	0.00691044	0.011555	0.00833499	0.00898123	0.00823312	0.0100793	0.0077245	0.00717708	0.0069437	0.00722582	0.00740559
IL-17BR	0.00929439	0.0101963	0.0114672	0.0111928	0.0108437	0.0100334	0.0129389	0.0110958	0.0169854	0.0286409	0.0162016	0.0145933
IL-17C	0.00643009	0.00733775	0.0108219	0.00910716	0.00677919	0.00669519	0.00780883	0.00600031	0.00701071	0.00656212	0.00704165	0.00730338
IL-17D	0.00679423	0.007082	0.0111806	0.00925748	0.00818129	0.00770458	0.0101769	0.00761663	0.0068723	0.00636136	0.00644393	0.00743328
IL-17E	0.0145391	0.0126544	0.0163373	0.0166002	0.0107608	0.0130338	0.0187787	0.0144816	0.0092784	0.00863861	0.00967986	0.0124972
IL-17F	0.00663928	0.0062752	0.011673	0.00926548	0.00780769	0.00748273	0.00969295	0.00809673	0.00683944	0.00640319	0.00664073	0.00663473
IL-17R	0.0244777	0.0129835	0.0161663	0.0157172	0.0122013	0.0122501	0.0158418	0.0152254	0.00955313	0.00840245	0.00883215	0.0142916
IL-17RC	0.00647717	0.00684347	0.0122894	0.00886882	0.00631384	0.00646503	0.00813655	0.00898146	0.00703867	0.00637423	0.00647651	0.00697402
IL-17RD	0.00634009	0.0066094	0.00741203	0.00769656	0.00703851	0.00711559	0.0111913	0.00822918	0.00686321	0.00658851	0.00724178	0.00713302
IL-18 R alpha/IL-1 R5	0.00639731	0.00669359	0.00957894	0.00774857	0.00705335	0.00723815	0.00752824	0.00692528	0.006722	0.00651515	0.00717263	0.00695486
IL-2	0.00632698	0.00703927	0.00816984	0.00629739	0.00713026	0.00637685	0.00777979	0.0073601	0.00680239	0.00623331	0.00626973	0.00707127
IL-2 R alpha	0.00636572	0.00647483	0.00915639	0.0067232	0.00699401	0.00607293	0.00697912	0.0070773	0.00682476	0.00621465	0.00627439	0.00677456
IL-2 R beta	0.00677993	0.00688875	0.0102808	0.00793833	0.00894497	0.00807228	0.00993353	0.00865506	0.00717988	0.00686842	0.00707955	0.00751349
IL-20	0.00826691	0.00879127	0.0114684	0.00851217	0.0103383	0.00990137	0.0139889	0.0105765	0.152772	0.00965336	0.0105236	0.221609
IL-20 R alpha	0.00636036	0.00647929	0.00725734	0.00728504	0.0265547	0.00694088	0.00900573	0.00833202	0.00701001	0.00905043	0.00639872	0.00692362
IL-21	0.00621732	0.0063664	0.00688114	0.00710729	0.00685116	0.00650164	0.00708434	0.00597124	0.00666887	0.00626806	0.00635085	0.00677243
IL-21 R	0.0066363	0.0066381	0.00825291	0.00647343	0.00805437	0.00754818	0.00849935	0.00798718	0.00669194	0.00627771	0.0066527	0.00698183
IL-22	0.00650637	0.00676502	0.00983535	0.00783202	0.00733574	0.00676674	0.00821876	0.00892221	0.00776707	0.00797326	0.0103793	0.0145038
IL-22BP	0.00813937	0.00796342	0.0110663	0.00923804	0.00798625	0.00765466	0.00911314	0.00766805	0.00737071	0.00736775	0.0076899	0.00739566
IL-23	0.00634009	0.00694296	0.0104993	0.00835785	0.0068616	0.0067745	0.00793104	0.00628814	0.00720924	0.0066091	0.00673116	0.00711244
IL-23 R	0.00631625	0.0068052	0.00985221	0.00867506	0.00628857	0.00561316	0.00718244	0.0058399	0.00663183	0.0063382	0.00640138	0.00702442
IL-24	0.00622745	0.00639638	0.0103247	0.00818238	0.00719894	0.00685714	0.00684157	0.00573148	0.00673808	0.00609368	0.00614607	0.00675114
IL-27	0.00647598	0.00683518	0.0129527	0.00937922	0.00800987	0.00804621	0.010287	0.00902617	0.00689536	0.00624361	0.00654699	0.00674475
IL-28 / IFN-lambda	0.00656418	0.00687281	0.0125506	0.0093415	0.00731542	0.00740232	0.0109589	0.00947664	0.00722531	0.00661746	0.00667863	0.0075213
IL-3	0.0079129	0.00837033	0.00941943	0.00855789	0.00875872	0.00833294	0.010036	0.00850137	0.00882333	0.00952917	0.00996642	0.00877485
IL-3 R alpha	0.00673106	0.00722678	0.0107527	0.00862534	0.00744563	0.00755317	0.00855141	0.00761496	0.00717498	0.00681308	0.00783684	0.00783575
IL-3 R beta	0.0110382	0.0111077	0.0122677	0.0111202	0.0112212	0.0108059	0.014948	0.0115043	0.129798	0.158501	0.0892822	0.301878
IL-31	0.00665537	0.00710943	0.0111692	0.0090963	0.00726157	0.0071289	0.00996313	0.00989469	0.00734974	0.00677576	0.00729164	0.00705281
IL-31 RA	0.00639612	0.00662534	0.00839617	0.00647858	0.00664898	0.00647003	0.00851469	0.00733104	0.00642141	0.00642056	0.00754296	0.00690517
IL-4	0.0061464	0.00660685	0.0111794	0.00914374	0.00748409	0.00693867	0.00866814	0.00677773	0.00681567	0.00629122	0.00688075	0.00763984
IL-4 R	0.0065165	0.00732755	0.010607	0.00845216	0.00707917	0.00737348	0.00864786	0.00798047	0.00678631	0.00677447	0.00678966	0.00750639
IL-5	0.00818169	0.00820706	0.00988411	0.00931063	0.00891915	0.00799242	0.0105397	0.00982092	0.00876391	0.00891208	0.0270376	0.00953578
IL-5 R alpha	0.0052411	0.00592505	0.00988772	0.00818295	0.0058342	0.00529537	0.00667003	0.00561243	0.00575173	0.00537492	0.00558691	0.00590787
IL-6	0.00885634	0.00902981	0.0111451	0.00997935	0.00942516	0.00853149	0.011394	0.00775077	0.0332248	0.0732219	0.0171184	0.0662507
IL-6 R	0.0061315	0.00679691	0.00887048	0.00658546	0.0067259	0.00705014	0.00797598	0.0062384	0.00683525	0.00963213	0.00640271	0.00693711
IL-7	0.00650816	0.00635556	0.0108538	0.00742793	0.00687314	0.00651828	0.0078324	0.00626802	0.00697226	0.00631889	0.00664805	0.00705423
IL-7 R alpha	0.00675132	0.00701121	0.010731	0.00824068	0.00727146	0.00681887	0.0079568	0.00699514	0.00702818	0.0066432	0.00683355	0.00726292
IL-9	0.00885038	0.00900812	0.0153875	0.0116163	0.0110069	0.0129217	0.0129608	0.0104949	0.00958668	0.00942686	0.00965858	0.00973382
IL-9 R	0.0115484	0.0136519	0.0137683	0.0115774	0.0109833	0.010512	0.0140174	0.011682	0.0124395	0.0108933	0.0121306	0.0295691
Insulin	0.0066506	0.00680201	0.00865078	0.00758625	0.00711543	0.00696917	0.00707448	0.00869083	0.00659338	0.00674423	0.00738672	0.00702868
Integrin beta 2 / CD18	0.00720189	0.00717894	0.0132055	0.007728	0.00779505	0.00799519	0.00913835	0.00808667	0.00771674	0.00732721	0.00760679	0.00820912
KC	0.00714825	0.00665149	0.00779184	0.00614936	0.00747694	0.0072082	0.00639219	0.0080481	0.00651089	0.00598622	0.00623383	0.0067845
Kremen-1	0.00687112	0.00720956	0.00864115	0.0062711	0.00797031	0.00715385	0.00841879	0.00773121	0.00722881	0.00690574	0.00757554	0.0074496
Kremen-2	0.00651174	0.00684666	0.0100268	0.00761311	0.00767198	0.00687655	0.0084862	0.00838512	0.00700372	0.00737483	0.00673448	0.00715077
L-Selectin	0.00886588	0.00928046	0.0132019	0.0101651	0.0101866	0.00884651	0.0121065	0.0120068	0.00898341	0.00851184	0.00945912	0.00934696
Lefty-1	0.00665001	0.00747297	0.0100647	0.00890597	0.00832194	0.00779498	0.0100256	0.00830855	0.00738889	0.00706017	0.00706293	0.00740134
Leptin R	0.00654154	0.00685941	0.0125434	0.0093535	0.00787856	0.00793418	0.00973844	0.00797656	0.006794	0.00655312	0.00670589	0.00728067
LEPTIN(OB)	0.00618812	0.00668338	0.0103416	0.00837271	0.00671271	0.00648888	0.00837604	0.00822248	0.00666398	0.00631053	0.00649845	0.006864
LIF	0.00982542	0.0101427	0.0124368	0.0111173	0.010163	0.00985755	0.0121492	0.0117597	0.0510106	0.0100304	0.0451933	0.0751299
LIGHT / TNFSF14	0.00666908	0.00691809	0.00967223	0.00893341	0.00845929	0.00697583	0.00924083	0.0088205	0.00713584	0.00702156	0.00682091	0.00692788
LIX	0.00650399	0.00712984	0.0119072	0.00925976	0.0060666	0.00608457	0.0098031	0.00985892	0.00698065	0.00694499	0.00656494	0.0070521
LRP-6	0.00875026	0.00924857	0.0134968	0.0135413	0.00908782	0.00884429	0.0129362	0.012498	0.0330627	0.0152876	0.011231	0.0244705
Lungkine	0.00628228	0.00688237	0.00798987	0.00672149	0.00750551	0.00705791	0.00901066	0.00960351	0.00687579	0.00721074	0.00761876	0.00720613
Lymphotactin	0.00811375	0.00842391	0.0107563	0.00843101	0.00797471	0.00967897	0.0106701	0.0110136	0.025153	0.0131789	0.0114099	0.0282723
Lymphotoxin beta R / TNFRSF3	0.00631089	0.00669933	0.0084702	0.00636026	0.00821206	0.00792586	0.00945072	0.00867518	0.00673668	0.00630667	0.00646454	0.00702513
M-CSF	0.00650756	0.00710369	0.0109838	0.00856647	0.00854225	0.00781993	0.00992915	0.00885347	0.00697785	0.00677769	0.00668794	0.0074134
MAdCAM-1	0.00612435	0.0069385	0.00756672	0.00632654	0.00916474	0.00674067	0.00857607	0.00790223	0.00693661	0.00636586	0.00652837	0.00716567
MCP-1	0.00735267	0.00811267	0.0105047	0.00762512	0.0102064	0.00899792	0.00945401	0.00871431	0.00785445	0.0078362	0.00833682	0.00830494
MCP-5	0.0063395	0.00673313	0.00872843	0.00705699	0.00785604	0.00695031	0.0077765	0.00836332	0.00692123	0.00658465	0.00671719	0.00701661
MDC	0.0065767	0.00694041	0.00886927	0.0075068	0.00725553	0.00689374	0.00881556	0.00887191	0.00740916	0.00701513	0.00671187	0.0075291
MFG-E8	0.0102331	0.0109234	0.0125229	0.0119804	0.0110597	0.00993243	0.0108992	0.0129161	0.0120068	0.0127504	0.0830338	0.0550802
MFRP	0.00647836	0.00661705	0.0110205	0.00859276	0.00760221	0.00683551	0.00949182	0.00725167	0.00655773	0.00638195	0.00634221	0.0104032
MIG	0.0062501	0.00666489	0.0116279	0.01034	0.00698412	0.00720543	0.00935263	0.00822751	0.00662274	0.006353	0.00668661	0.00692149
MIP-1 alpha	0.00641936	0.00680648	0.0125675	0.00934835	0.00654789	0.00611064	0.00815574	0.00852428	0.00685202	0.00707368	0.00656161	0.00699319
MIP-1 gamma	0.00642234	0.00728099	0.0116995	0.00953582	0.00622209	0.00630032	0.00875144	0.00940734	0.0070876	0.0068105	0.00668395	0.00702584
MIP-2	0.00726387	0.00719872	0.0100779	0.00686666	0.00885761	0.00750381	0.0115749	0.012104	0.00654794	0.0064656	0.00691665	0.00675185
MIP-3 alpha	0.00637228	0.00633196	0.00803802	0.00633054	0.0067693	0.00723427	0.00750742	0.00641389	0.00641722	0.00644437	0.00707356	0.00687465
MIP-3 beta	0.00610825	0.00648057	0.00921116	0.00673006	0.00785823	0.00721264	0.00966281	0.00813026	0.00677513	0.00647204	0.00686745	0.00694989
MMP-12	0.00637883	0.00706414	0.010099	0.00757539	0.0080736	0.00683606	0.00910053	0.00802854	0.00711067	0.0068356	0.00680097	0.00741056
MMP-14 / LEM-2	0.00701832	0.00751633	0.00922441	0.00852531	0.00879608	0.010324	0.00999765	0.00836555	0.00759511	0.00745848	0.00713141	0.0077527
MMP-2	0.0191037	0.0545998	0.0215806	0.022789	0.0256531	0.0339141	0.0194774	0.0174219	0.181844	0.00911799	0.00966191	0.210572
MMP-24 / MT5-MMP	0.00964364	0.00945776	0.0100629	0.0093775	0.0106674	0.0101171	0.0135511	0.0113909	0.150852	0.177441	0.179796	0.347272
MMP-3	0.00626679	0.00650927	0.00902036	0.00679922	0.00698907	0.00685326	0.00827192	0.00690292	0.00665629	0.0062095	0.00645723	0.00671778
MMP-9	0.00645214	0.00656412	0.0104409	0.00718445	0.00743848	0.00648611	0.00749207	0.00631944	0.00673738	0.00652609	0.00714736	0.00681786
Neuregulin-3 / NRG3	0.00654273	0.00694105	0.010031	0.00846359	0.00727036	0.00675066	0.00832782	0.00678332	0.00694709	0.00657113	0.00675908	0.00781232
Neurturin	0.00928545	0.0062331	0.0104433	0.00875679	0.00736596	0.00722873	0.00859306	0.00778989	0.00638646	0.00624811	0.0066281	0.00656942
NGF R / TNFRSF16	0.00663332	0.00639319	0.0117489	0.0103126	0.00765221	0.0075565	0.0109808	0.0080386	0.0068003	0.00679699	0.00646122	0.00711102
NOV / CCN3	0.00679721	0.00703289	0.0111319	0.00923404	0.0070006	0.00633026	0.010509	0.00853602	0.00655773	0.00703315	0.00685083	0.00719478
Osteoactivin / GPNMB	0.0095018	0.00993929	0.0128636	0.011566	0.00907463	0.00936007	0.0135828	0.0125606	0.0283644	0.0154247	0.016183	0.0399631
Osteopontin	0.00647657	0.0067293	0.0103283	0.00739935	0.00733684	0.00679391	0.00877829	0.00768091	0.00687439	0.00621594	0.00675177	0.00696621
Osteoporotegerin	0.00658921	0.00707116	0.00974326	0.00715415	0.00707313	0.00656209	0.00875692	0.00667266	0.00686321	0.00649778	0.00672783	0.00721678
OX40 Ligand / TNFSF4	0.00641936	0.00661769	0.00916963	0.00693582	0.00691105	0.00671516	0.00841112	0.00678164	0.00677583	0.00688515	0.00717994	0.00706488
P-Selectin	0.0566419	0.0197319	0.0294603	0.03213	0.036148	0.0697222	0.0672012	0.0449051	0.00899669	0.008896	0.00881819	0.00877556
PDGF C	0.0081346	0.00834801	0.01229	0.00892712	0.00960097	0.00963516	0.0107737	0.0105089	0.00874923	0.00788124	0.00843057	0.00876988
PDGF R alpha	0.00617322	0.00641105	0.0104487	0.00712043	0.00700555	0.00685048	0.00810422	0.00677717	0.00684364	0.00596112	0.00664672	0.00703365
PDGF R beta	0.0066661	0.00677714	0.010926	0.00736334	0.0087307	0.0083884	0.00825164	0.00704824	0.00675765	0.00857426	0.0077524	0.00710037
Pentraxin3 / TSG-14	0.00665596	0.00716683	0.00974988	0.00737249	0.00828403	0.00775782	0.0100026	0.00831637	0.00735673	0.00773324	0.00719856	0.00711741
PF-4	0.00758749	0.00800552	0.0128492	0.00913745	0.00923231	0.00819374	0.0103676	0.00884453	0.00846891	0.00783942	0.00762873	0.0180047
PlGF-2	0.00638718	0.00698633	0.0121726	0.00847845	0.00787801	0.00758977	0.0097335	0.00800674	0.00696317	0.00653832	0.0065184	0.00710818
Progranulin	0.00695098	0.00769619	0.0102188	0.0080172	0.00831095	0.00766187	0.0107216	0.00876181	0.00662274	0.00637166	0.00663142	0.00691156
Prolactin	0.0126814	0.0127877	0.0185951	0.0148639	0.014294	0.0142833	0.0194029	0.0150131	0.0124744	0.0152123	0.0216854	0.0491603
RAGE	0.00677159	0.00708328	0.0125946	0.0102383	0.00820327	0.00824753	0.0107676	0.00902114	0.00689886	0.00695078	0.00697649	0.00778606
RANTES	0.00699806	0.00712154	0.00918408	0.00842586	0.00689182	0.00669519	0.00959047	0.0095873	0.00707502	0.00707111	0.0071713	0.012889
RELM beta	0.00743671	0.00754057	0.0104975	0.00772628	0.00763407	0.00747053	0.00903148	0.00769767	0.00690236	0.00706918	0.00667331	0.00707766
Resistin	0.00645631	0.00678096	0.00910523	0.00676378	0.00895047	0.00743504	0.00807792	0.00638874	0.00664091	0.0065795	0.00670722	0.00711741
S100A10	0.00595449	0.00655455	0.0107057	0.00728904	0.00711433	0.00629643	0.00757099	0.00556604	0.00655353	0.00624682	0.00667863	0.0069506
SCF	0.00604866	0.00631028	0.00828662	0.00623738	0.00588859	0.00625595	0.0062623	0.00842871	0.00633473	0.00620435	0.00633356	0.0064665
SCF R / c-kit	0.00616547	0.00634599	0.00946578	0.00734334	0.00740937	0.00666414	0.00837385	0.00657373	0.00657241	0.0063974	0.0065184	0.00679231
SDF-1	0.00828003	0.00881232	0.0143004	0.00981074	0.00875762	0.0083762	0.00895805	0.00813026	0.00905681	0.01167	0.0100322	0.0167937
Serum Amyloid A1	0.00854107	0.00960063	0.0134836	0.009689	0.010635	0.0104482	0.0130672	0.0104441	0.00901417	0.00973894	0.00897443	0.00942646
Shh-N	0.00643843	0.00677778	0.00880487	0.00755139	0.00780604	0.00736959	0.00931646	0.00839685	0.00744132	0.00663677	0.00667464	0.00712805
SIGIRR	0.0185024	0.0206969	0.0205832	0.0195998	0.0160313	0.0161845	0.0147425	0.0117072	0.0839684	0.0247692	0.0240391	0.0841496
SLPI	0.0066059	0.007325	0.0112824	0.00830984	0.0090142	0.00831464	0.0110236	0.00892892	0.00651019	0.00639096	0.00640005	0.00685122
Soggy-1	0.00822817	0.00872749	0.0147795	0.0115431	0.00970206	0.00880325	0.0140514	0.00942746	0.00896383	0.010015	0.0148273	0.0127825
SPARC	0.0118881	0.0134618	0.0204183	0.0199456	0.0166983	0.0140298	0.0203082	0.016597	0.0132441	0.0145444	0.0362873	0.0243108
Spinesin Ectodomain	0.00688721	0.00731224	0.00972159	0.00824182	0.00655668	0.00622378	0.00832288	0.00887471	0.00716869	0.00725064	0.00741265	0.00753123
TACI / TNFRSF13B	0.00662974	0.0172005	0.0104644	0.0087105	0.00702588	0.00701187	0.00828178	0.00611767	0.00701979	0.00682337	0.00682889	0.00724163
TARC	0.00651412	0.00683071	0.00850692	0.00685123	0.00773681	0.0065449	0.00710681	0.009091	0.00643819	0.00658529	0.00715002	0.00692646
TCA-3	0.00657372	0.00672612	0.0110663	0.00739535	0.00857302	0.00850432	0.00968583	0.00773177	0.00697156	0.00648362	0.00706426	0.00684767
TCCR / WSX-1	0.00616011	0.00651692	0.00789176	0.00623052	0.00868565	0.00794417	0.00951977	0.00893563	0.00643819	0.00620821	0.00687676	0.00702158
TECK	0.00617977	0.00640084	0.0098811	0.00669291	0.00747694	0.00701964	0.00906875	0.00797768	0.00655353	0.00643922	0.00640936	0.00712379
TFPI	0.00621732	0.00662216	0.0107599	0.0071873	0.00745057	0.00666192	0.00884461	0.00683697	0.00652347	0.00649906	0.00678501	0.00659356
TGF-beta 1	0.00762146	0.0084896	0.0105559	0.00806293	0.0099449	0.0091105	0.0117311	0.0100439	0.00832631	0.00831365	0.00877497	0.00851292
TGF-beta 2	0.00699925	0.00697166	0.008469	0.00665919	0.00855928	0.00825308	0.010429	0.0089781	0.00700651	0.00663419	0.00670589	0.00743541
TGF-beta 3	0.0290531	0.0681961	0.0206476	0.0144403	0.0161478	0.0160231	0.0192544	0.0140825	0.0132504	0.0134537	0.0142887	0.0131105
TGF-beta RI / ALK-5	0.00649266	0.00730586	0.00958255	0.00802063	0.007005	0.00653103	0.00842975	0.00686436	0.0069408	0.00658593	0.0069366	0.00709682
TGF-beta RII	0.00693608	0.00704054	0.00961144	0.00782402	0.0085428	0.00773175	0.0101303	0.00778095	0.00680659	0.00700741	0.00732156	0.00750213
Thrombospondin	0.00898388	0.010153	0.0124621	0.0114088	0.0109663	0.0112413	0.0147222	0.0107856	0.00897712	0.00839216	0.0102696	0.00910207
Thymus Chemokine-1	0.00717745	0.00786393	0.00984318	0.010468	0.00825931	0.00796413	0.0113392	0.00883838	0.00730361	0.00794237	0.0114258	0.00878975
Tie-2	0.00667086	0.00723061	0.0132518	0.00894541	0.00667535	0.00633692	0.00902436	0.00908429	0.00671711	0.00664191	0.00656693	0.00720329
TIMP-1	0.00689138	0.00707435	0.00986124	0.00935636	0.00618638	0.00692536	0.00802037	0.00835829	0.00728893	0.00706274	0.00673381	0.0070088
TIMP-2	0.00704276	0.00775678	0.00797783	0.00773085	0.00946911	0.00684217	0.00797982	0.00937883	0.00704496	0.00717085	0.0103766	0.0074496
TIMP-4	0.00624831	0.00655327	0.00798205	0.00751423	0.0063045	0.00643564	0.00724711	0.00778989	0.00658359	0.00635621	0.00669991	0.00673694
TL1A / TNFSF15	0.00544313	0.00537018	0.00828902	0.00576699	0.00636933	0.00595923	0.00743398	0.00596174	0.00550287	0.00520376	0.0053828	0.00568853
TLR1	0.0066357	0.00686962	0.0083763	0.00692325	0.00807031	0.00659426	0.00821328	0.0068448	0.0068702	0.00710264	0.00695189	0.00736372
TLR2	0.00793674	0.0086382	0.0117615	0.00885453	0.0112871	0.00852872	0.0113979	0.00870872	0.00871777	0.00818625	0.00941391	0.0100405
TLR3	0.00631923	0.00663619	0.0104204	0.00750623	0.00722092	0.00626538	0.00796064	0.00564541	0.00675136	0.00643922	0.00664938	0.00682425
TLR4	0.00646227	0.00729311	0.0113757	0.00810465	0.00848731	0.00779941	0.00903915	0.00751156	0.00707432	0.00785615	0.00726904	0.00736159
TMEFF1 / Tomoregulin-1	0.00669768	0.00698059	0.0113383	0.0074828	0.00719839	0.00732966	0.00788391	0.00768147	0.00715611	0.00678348	0.00733353	0.00724446
TNF RI / TNFRSF1A	0.0063681	0.00672229	0.00958917	0.00751538	0.00739123	0.00681333	0.010093	0.00722094	0.00678981	0.00780917	0.00711612	0.0069435
TNF RII	0.00595687	0.00615721	0.009535	0.00722617	0.00740167	0.00685714	0.00935263	0.00667154	0.00652907	0.00623846	0.00691134	0.00688955
TNF-alpha	0.00781694	0.00816943	0.0101315	0.00919175	0.00813953	0.00819318	0.0115688	0.0087361	0.00808933	0.00839924	0.00894318	0.0105459
TNF-beta / TNFSF1B	0.00867278	0.0093825	0.0125037	0.018092	0.0106822	0.00976937	0.0157141	0.0104843	0.0207015	0.0129775	0.0159915	0.0322111
TPO	0.0071846	0.00697677	0.0100665	0.00901171	0.00738135	0.00682054	0.00942058	0.00934474	0.00709809	0.00804919	0.00765998	0.00738075
TRAIL / TNFSF10	0.00879198	0.00943544	0.015689	0.0124959	0.00828293	0.00898793	0.0123103	0.0122521	0.00908966	0.00899573	0.00893587	0.00944492
TRAIL R2 / TNFRSF10B	0.00885694	0.00875556	0.01392	0.00978102	0.00943175	0.00892304	0.0105402	0.013276	0.00906799	0.00865341	0.0127256	0.00971891
TRANCE / TNFSF11	0.00691999	0.0066904	0.00975771	0.00671349	0.0073786	0.0076835	0.00929563	0.00755068	0.00694849	0.00676675	0.00721319	0.00725227
TREM-1	0.00640863	0.00657623	0.00905948	0.0067695	0.00676051	0.00664916	0.00786967	0.00586673	0.00664581	0.00645531	0.00703301	0.00701164
TROY	0.00639016	0.00660557	0.00999366	0.00720216	0.00775165	0.00756482	0.00914273	0.00719355	0.00678352	0.00641091	0.00741996	0.0069364
TSLP	0.00621434	0.00673249	0.00885001	0.00672663	0.0065792	0.00714276	0.00876185	0.00797992	0.00694849	0.00690059	0.00701705	0.00670429
TSLP R	0.00671556	0.0070431	0.0089716	0.00683294	0.00875982	0.00796247	0.0103955	0.00840188	0.00689886	0.00660717	0.00707423	0.00705565
TWEAK / TNFSF12	0.00680317	0.00742449	0.0102976	0.00759597	0.00881861	0.00815492	0.00950881	0.00874449	0.00748186	0.00713803	0.00734683	0.00747232
TWEAK R / TNFRSF12	0.00668219	0.00728609	0.0102838	0.00760911	0.00842028	0.00821759	0.0102437	0.00855614	0.0072358	0.00808265	0.00726837	0.00762848
Ubiqultin	0.00666192	0.00682433	0.0117783	0.00775372	0.00812085	0.00803623	0.00845222	0.00758086	0.00725607	0.00731949	0.0071959	0.00740418
uPAR	0.00641697	0.00728418	0.00985702	0.0131983	0.00804229	0.00797023	0.0102048	0.00789161	0.0075972	0.00772166	0.00891127	0.00745315
Urokinase	0.00637526	0.00724783	0.0103073	0.0111385	0.00829502	0.00736294	0.0108498	0.00780386	0.00665489	0.00664063	0.00689205	0.00687465
VCAM-1	0.0238996	0.0250377	0.0211857	0.0247632	0.020465	0.0184245	0.0357012	0.0179283	0.0115587	0.0134839	0.0116685	0.0122942
VE-Cadherin	0.00897077	0.0099074	0.0151088	0.0114277	0.00960262	0.0093512	0.0125016	0.0119822	0.0263323	0.0213414	0.0351444	0.0864168
VEGF	0.00648075	0.00724464	0.0109092	0.0092529	0.00665667	0.00724425	0.00861279	0.0094677	0.00693102	0.00685683	0.00682025	0.00697047
VEGF R1	0.00649743	0.00620058	0.00953379	0.0072136	0.00612924	0.00609068	0.00778637	0.007231	0.00681567	0.00702092	0.00789069	0.00685406
VEGF R2	0.006265	0.00680201	0.0100123	0.00707071	0.00755001	0.00717493	0.0109129	0.00772841	0.0065752	0.0067719	0.00719391	0.00707624
VEGF R3	0.0140337	0.00663364	0.010359	0.00735934	0.00720443	0.00651107	0.00762744	0.00576892	0.00663252	0.00634141	0.00683421	0.00690588
VEGF-B	0.00658504	0.00716619	0.00856892	0.00701469	0.00745607	0.00778222	0.00957512	0.00686157	0.00671781	0.00639675	0.00716066	0.00731332
VEGF-D	0.0064128	0.00702205	0.0099762	0.00706213	0.00803899	0.00898128	0.010082	0.00681797	0.00723021	0.00740507	0.00818855	0.00854486
VEGFC	0.00855477	0.00880467	0.0122454	0.00914488	0.00959273	0.00879327	0.0117064	0.00878305	0.00863389	0.00823772	0.00908746	0.00867902
WIF-1	0.00704336	0.00753419	0.00988832	0.00832013	0.00891256	0.0086524	0.0105199	0.00870201	0.00685272	0.00682723	0.00695256	0.00709611
WISP-1 / CCN4	0.0274702	0.00731352	0.00936345	0.00726275	0.00890981	0.00852872	0.0110279	0.00842144	0.00748326	0.00740893	0.00739536	0.00787479

## Sheet: Longitudinal Dates
All Longitudinal Assignments and Dates
Legend: M - Male F - Female OA - Old Alk5i+OT Treated CL - Old Control
Mouse ID	Sex	Assignment	Death Date	DOB	First Injection
1	M	OA	2021-08-19	2018-11-01	2020-12-14
2	M	OA	2021-10-05	2018-11-01	2020-12-14
3	M	CL	2021-03-23	2018-11-01	2020-12-14
4	M	CL	2020-12-21	2018-11-01	2020-12-14
5	M	CL	2021-02-23	2018-11-01	2020-12-14
6	M	OA	2021-01-13	2018-11-01	2020-12-14
7	M	OA	2021-11-12	2018-11-01	2020-12-14
8	M	CL	2020-12-29	2018-11-01	2020-12-14
9	M	CL	2021-08-22	2018-11-01	2020-12-14
10	M	OA	2021-05-12	2018-11-01	2020-12-14
11	M	OA	2021-10-28	2018-11-01	2020-12-14
12	M	CL	2021-03-10	2018-11-01	2020-12-14
13	F	CL	2023-04-24	2020-09-10	2022-11-14
14	F	CL	2023-04-17	2020-09-10	2022-11-14
15	F	CL	2023-04-07	2020-09-10	2022-11-14
16	F	OA	2022-06-29	2020-01-05	2022-04-04
17	F	OA	2022-09-13	2020-03-02	2022-05-02
18	F	OA	2022-07-12	2020-03-02	2022-05-02
19	M	OA	2022-10-26	2020-01-14	2022-04-04
20	M	CL	2022-10-26	2020-01-14	2022-04-04
21	M	OA	2022-12-14	2020-01-14	2022-04-04
22	M	OA	2022-11-23	2020-01-14	2022-04-04
23	M	OA	2022-06-22	2020-01-14	2022-04-04
24	M	CL	2023-01-03	2020-01-14	2022-04-04
25	M	CL	2022-06-10	2020-01-14	2022-04-04
26	M	OA	2022-12-23	2020-01-14	2022-04-04
27	M	OA	2023-01-18	2020-01-05	2022-04-04
28	F	CL	2023-05-08	2020-09-05	2022-11-14
29	F	CL	2023-04-20	2020-09-05	2022-11-14
30	F	CL	2023-06-22	2021-02-01	2023-03-06
31	F	OA	2023-06-05	2021-04-15	2023-05-01
32	M	CL	2023-10-09	2021-02-15	2023-03-06
33	M	CL	2023-07-31	2021-02-15	2023-03-06
34	F	OA	2023-06-29	2021-03-15	2023-04-03
35	F	CL	2023-07-10	2021-03-15	2023-04-03
36	F	OA	2023-12-10	2021-03-15	2023-04-03
37	F	CL	2023-08-18	2021-03-15	2023-04-03
38	F	OA	2023-07-04	2021-03-15	2023-04-03
39	F	CL	2023-05-29	2021-04-15	2023-05-01
40	F	CL	2023-11-27	2021-04-15	2023-05-01
41	F	CL	2023-06-29	2021-03-10	2023-05-01
42	F	CL	2023-08-14	2021-03-10	2023-05-01
43	F	OA	2023-08-14	2021-03-10	2023-05-01
44	F	OA	2023-09-27	2021-03-10	2023-05-01
45	F	CL	2023-03-06	2020-01-05	2022-03-26
46	F	OA	2022-08-16	2020-01-30	2022-03-26
47	M	CL	2023-02-10	2020-09-10	2022-11-14
48	M	OA	2023-06-15	2020-10-01	2022-11-14
49	M	OA	2023-05-19	2020-10-01	2022-11-14

## Sheet: Overall Frailty Index
Mouse ID	2020-12-09	2020-12-29	2021-01-27	2021-02-24	2021-03-22	2021-04-21	2021-05-17	2021-06-24	2021-07-14	2021-08-11	2021-09-14	2021-11-03	2021-12-01	2022-01-05	2022-01-26	2022-02-25	2022-03-28	2022-04-22	2022-05-25	2022-06-15	2022-07-18	2022-08-08	2022-09-12	2022-10-03	2022-11-02	2022-12-05	2023-01-05	2023-01-23	2023-02-21	2023-03-21	2023-04-19	2023-05-16	2023-06-12	2023-07-11	2023-08-14	2023-09-06	2023-10-06	2023-11-03	2023-12-04
1	0.518519	0.633333	0.683333	0.95	0.933333	1.23333	0.966667	1.36667	1.21667	1.53333
2	0.482143	0.55	0.666667	0.766667	0.8	0.966667	0.8	0.95	0.866667	0.933333	1.11667
3	0.196429	0.483333	0.8	0.933333	0.633333
4	0.589286
5	0.821429	1.06667	1.16667
6	1.01786	0.916667
7	0.535714	0.633333	0.583333	0.783333	0.983333	0.8	0.666667	0.966667	0.716667	0.583333	1.16667	1.28333
8	1.10714	1.35
9	0.482143	0.516667	0.65	0.883333	0.85	0.883333	0.983333	0.85	1.03333	1.26667
10	0.392857	0.5	1.1	0.883333	0.966667	1.01667
11	0.696429	0.616667	0.666667	0.9	0.766667	1.01667	1.06667	0.966667	0.9	0.9	1.18333
12	0.428571	0.483333	0.666667	0.9
13																									0.333333	0.133333	0.35	0.35	0.4	0.6	1.05
14																									0.2	0.15	0.3	0.3	0.233333	0.366667
15																									0.233333	0.3	0.433333	0.45	0.4	0.533333
16																0.8	0.827586	0.913793	0.733333	1.11667
17																		0.568966	0.5	0.566667	1.01667	0.8	1.01667
18																		0.655172	0.6	0.6
19																	0.65	0.706897	0.516667	0.366667	0.533333	0.516667	0.266667	0.55
20																	0.483333	0.672414	0.516667	0.283333	0.396552	0.3	0.3	0.316667
21																	0.982759	0.5	0.916667	0.716667	0.633333	0.783333	0.7	0.583333	0.766667	0.966667
22																	1.2069	0.62069	0.733333	0.8	0.62069	0.766667	0.433333	0.583333	0.616667
23																	0.816667	0.5	0.8	0.7
24																	1.08333	0.5	0.883333	0.8	0.516667	0.75	0.433333	0.466667	0.516667	0.666667
25																	0.583333	0.62069	1.05
26																	0.666667	0.5	0.516667	0.716667	0.316667	0.716667	0.216667	0.45	0.3	0.666667
27																	0.6	0.37931	0.466667	0.683333	0.366667	0.583333	0.416667	0.35	0.5	0.7	0.733333
28																									0.15	0.133333	0.416667	0.466667	0.4	0.6	0.833333
29																									0.266667	0.2	0.3	0.4	0.466667	0.516667
30																													0.3	0.366667	0.366667	0.366667	0.516667
31																															0.166667	0.2
32																													0.316667	0.466667	0.466667	0.5	0.45	0.766667	0.533333	0.8	1.34483
33																													0.3	0.566667	0.483333	0.566667	0.566667	0.766667
34																														0.166667	0.233333	0.3	0.566667
35																														0.216667	0.233333	0.233333	0.316667
36																														0.316667	0.283333	0.266667	0.316667	0.283333	0.416667	0.483333	0.293103	0.35	2
37																														0.216667	0.233333	0.2	0.166667	0.233333	0.283333
38																														0.133333	0.2	0.2	0.316667
39																															0.283333	0.466667
40																															0.166667	0.25	0.383333	0.533333	0.483333	0.483333	0.517241	0.85
41																															0.233333	0.266667	0.283333
42																															0.166667	0.216667	0.316667	0.483333
43																															0.15	0.266667	0.266667	0.316667
44																															0.15	0.183333	0.3	0.316667	0.3	0.466667
45																	0.133333	0.0689655	0.183333	0.466667	0.6	0.333333	0.233333	0.2	0.266667	0.233333	0.466667	0.482759
46																	0.316667	0.172414	0.433333	0.366667	0.5	0.916667
47																									0.316667	0.5	0.333333	0.583333
48																									0.25	0.2	0.483333	0.45	0.5	0.45	0.516667	0.716667	0.85
49																									0.283333	0.25	0.283333	0.35	0.4	0.416667	0.5	0.65

## Sheet: FI Weight
Mouse ID	2020-12-09	2020-12-29	2021-01-27	2021-02-24	2021-03-22	2021-04-21	2021-05-17	2021-06-24	2021-07-14	2021-08-11	2021-09-14	2021-11-03	2021-12-01	2022-01-05	2022-01-26	2022-02-25	2022-03-28	2022-04-22	2022-05-25	2022-06-15	2022-07-18	2022-08-08	2022-09-12	2022-10-03	2022-11-02	2022-12-05	2023-01-05	2023-01-23	2023-02-21	2023-03-21	2023-04-19	2023-05-16	2023-06-12	2023-07-11	2023-08-14	2023-09-06	2023-10-06	2023-11-03	2023-12-04
1	0	0	0	1	0.5	1.5	1	1	1.5	1
2	0.5	2	1.5	1	1	1.5	1	1	2	2	2
3	0	0.5	0.5	1	1
4	0.5
5	1	1	2
6	0	0.5
7	0.5	0.5	1	1	2	1	1	2	2	2	2	2
8	0.5	0.5
9	0	0	0.5	0.5	2	1	1	1.5	2	2
10	1	1	2	2	2	2
11	0.5	1	1	1	0.5	1	1	1	2	2	1
12	0	0.5	0.5	0.5
13																									0	0.5	0.5	0.5	1	0.5	1
14																									0	0	0	0	0	0.5
15																									0	0	0	0.5	0.5	1
16																1	1	1	1	1
17																		1	0.5	0.5	0	0	0
18																		0	0.5	0.5
19																	0.5	0.5	0.5	0	1	1	0.5	1.5
20																	0.5	0.5	0	0.5	0	0	0	0.5
21																	1.5	1.5	0.5	0.5	0.5	0.5	1	0.5	0	1
22																	1	1	1	1	1	1	1	0.5	0.5
23																	0.5	0.5	1	0
24																	2	1.5	1.5	1	0.5	0.5	0.5	0	0.5	1
25																	0.5	1	1.5
26																	0.5	0.5	0.5	0.5	0.5	0.5	0	0.5	0	1
27																	2	2	2	1.5	2	1.5	1.5	1.5	2	2	2
28																									0.5	0.5	0	0.5	0.5	0.5	1.5
29																									0.5	0.5	0.5	1	0.5	0.5
30																													0	0	0	0	0
31																															1.5	1
32																													0	0.5	0	0	0.5	0.5	0	0	0.5
33																													1	0.5	0.5	0.5	0.5	0.5
34																														0.5	0.5	0.5	1
35																														0	0	0	0.5
36																														2	1.5	1	1	1	0.5	0.5	0.5	0.5	0
37																														1	0	0	0	0.5	1
38																														0	0.5	0.5	0.5
39																															0	0.5	2
40																															0	0	0	0.5	1	1	0.5	0.5
41																															0.5	0	0.5
42																															0.5	0.5	0.5	0
43																															2	2	2	2
44																															0.5	0.5	0.5	1	0.5	1
45																	1	0.5	0.5	0	1.5	0.5	0.5	1	1	1.5	1.5	1.5
46																	0	0	0.5	0.5	1.5	1.5
47																									1	1	1	0.5
48																									0.5	1	1.5	1	1	1	1.5	1	1
49																									0	0.5	0.5	0.5	0.5	0.5	0.5	0.5

## Sheet: FI Gait Disorder
Mouse ID	2020-12-09	2020-12-29	2021-01-27	2021-02-24	2021-03-22	2021-04-21	2021-05-17	2021-06-24	2021-07-14	2021-08-11	2021-09-14	2021-11-03	2021-12-01	2022-01-05	2022-01-26	2022-02-25	2022-03-28	2022-04-22	2022-05-25	2022-06-15	2022-07-18	2022-08-08	2022-09-12	2022-10-03	2022-11-02	2022-12-05	2023-01-05	2023-01-23	2023-02-21	2023-03-21	2023-04-19	2023-05-16	2023-06-12	2023-07-11	2023-08-14	2023-09-06	2023-10-06	2023-11-03	2023-12-04
1	0	1	1	2	2	2	2	2	2	2
2	1	1	1	2	1	1	2	2	2	2	2
3	0.5	2	1	1	1
4	2
5	2	2	1.5
6	2	2
7	1	1.5	0	1	1	1	1	1	2	1	2	2
8	2	2
9	1	1	1	1	2	2	2	1	2	2
10	0	1	1.5	2	2	2
11	1	1	1	2	1	2	2	2	2	2	2
12	1	1.5	1	2
13																									0	0	0	0	0	1	2	2
14																									0	0	0	0	0	0
15																									0	0	0	0	0	0
16																0	0	1	1	1
17																		0	0	1	0	0	1
18																		0	0	0
19																	0	1	0	0	1	0	0	1
20																	0	1	0	0	0	0	0	0
21																	2	0	0	1	0	1	0	0	1	1
22																	1	0	0	1	1	0	0	0	1
23																	2	0	1	1
24																	2	0	1	0	0	1	1	1	1	1
25																	0	1	1
26																	2	0	0	1	0	0	0	0	0	1
27																	0	0	0	0	0	1	0	0	0	0	1
28																									0	0	0	0	0	0	0	0
29																									0	0	0	0	0	0
30																													0	0	0	0	0.5	0.5
31																															0	0
32																													0	0.5	0.5	0.5	0.5	1	0.5	2	2
33																													0	0	0	0	0	0.5
34																														0	0	0	2
35																														0	0	0	0
36																														0	0	0	0	0	2	1	0.5	0	0
37																														0	0	0	0	0	0
38																														0	0	0	0
39																															0	0
40																															0	0	0.5	0.5	1	0.5	1	0
41																															0	0	0
42																															0	0	0	0
43																															0	0	0.5	0
44																															0	0	0.5	0	0	0.5
45																	0	0	0	0	0	0	0	0	0	1	1	1
46																	0	0	0	0	0	2
47																									0	0	0	0
48																									0	0	0	0	0	1	1	1	1	1
49																									0	0	0	0	0	0	0	0

[truncated: 35 more sheets: FI Tremor, FI Walking Speed, FI Alopecia, FI Loss of Fur Color, FI Dermatitis, FI Loss of Whiskers, FI Coat Condition, FI Tumors, FI Distended Abdomen, FI Kyphosis, FI Tail Stiffening, FI Forelimb Grip Strength, FI Body Condition Score, FI Hearing Loss, FI Cataracts, FI Eye DischargeSwelling, FI Microphthalmia, FI Corneal Opacity, FI Vestibular Disturbance, FI Vision Loss …]
