# Supplementary material for: Sex-specific longitudinal reversal of aging in old frail mice
Source: publisher site journal article supplement (doi:10.18632/aging.206304), 2025-08-21
Supplement: Supplementary file [file aging-v17-206304-supplementary-material-SD1.pdf]

## SUPPLEMENTARY FIGURES

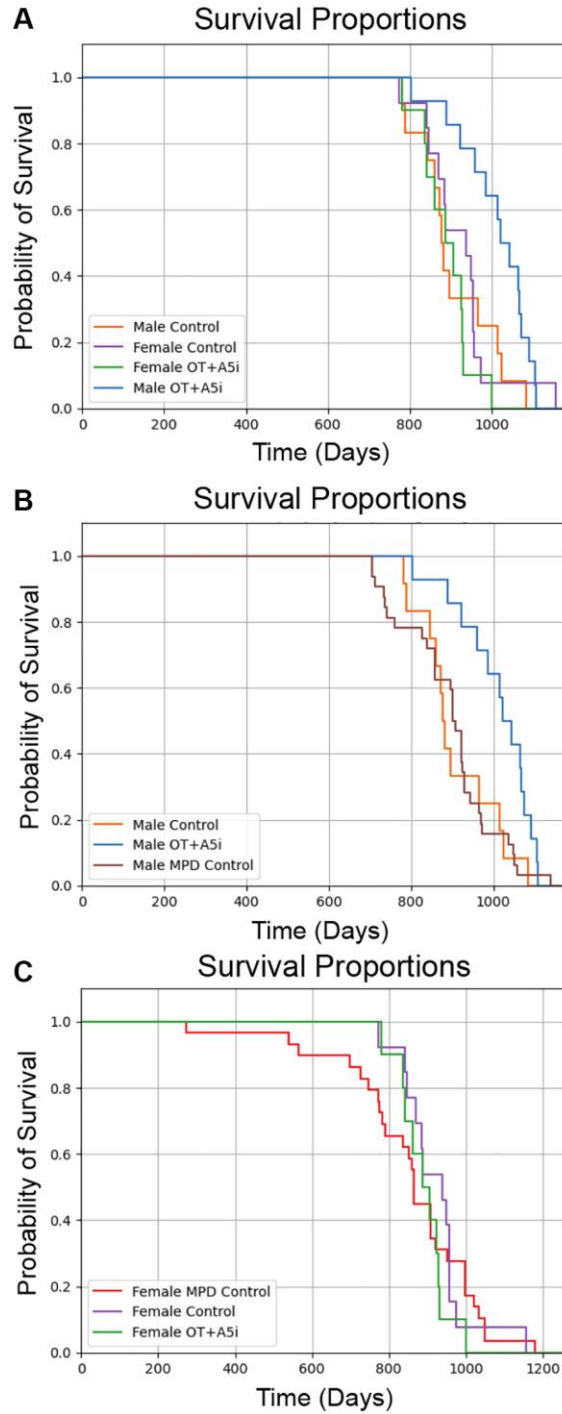

**Supplementary Figure 1. Full length lifespan graphs.** (A) Overlaid graphs of male and female lifespans. (B) Lifespans of male OT+A5i mice as compared to control mice graphs are plotted as Kaplan–Meier survival curves ( $p = 0.0109$ ). Average lifespan of male OT+A5i: 1012 days. Average lifespan of male controls: 908 days. Hazard Ratio of full-length lifespan control vs. OT+A5i mice: 2.864. Control  $N = 12$  and OT+A5i  $N = 14$ . MPD control includes published control data from the Mouse Phenome Database. (C) Lifespans of female OT+A5i as compared to control mice ( $p = 0.0109$ ). Average lifespan of female OT+A5i: 890 days. Average lifespan of female controls: 923 days. Hazard Ratio of control to OT+A5i mice: 0.6109. Control  $N = 13$  and OT+A5i  $N = 10$ .

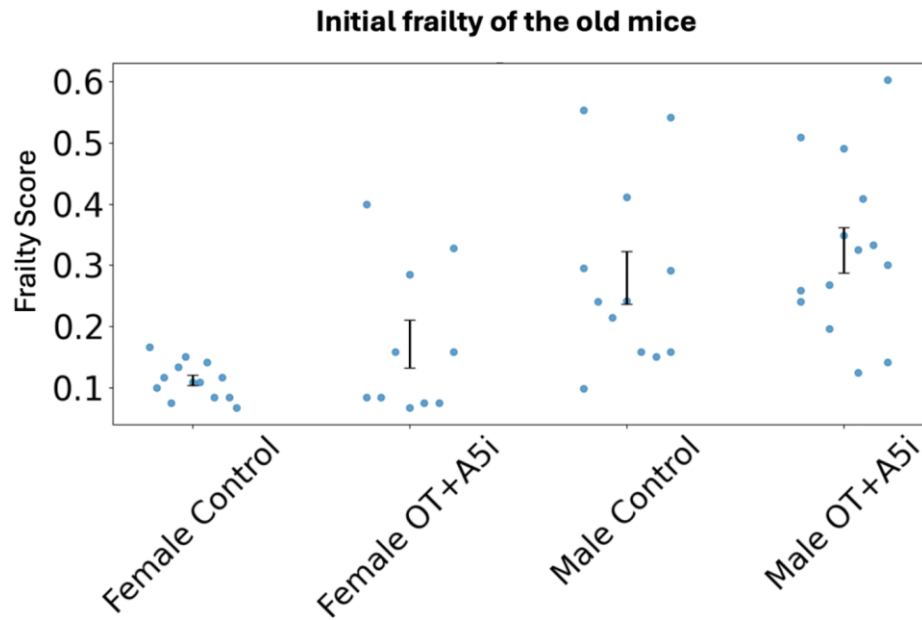

**Supplementary Figure 2. Initial Frailty of old male and female mice.** The initial frailties and standard errors from mean are shown for the 24–26-month-old mouse (each dot represents an animal) before administration of either OT+A5i or HBSS vehicle control. *p*-values were calculated via Welch’s *T*-test. Male Control vs. Female Control:  $p = 0.0026$ . Male OT+A5i vs. Female OT+A5i:  $p = 0.0093$ . Male Control vs. Male OT+A5i:  $p = 0.4340$ . Female Control vs. Female OT+A5i:  $p = 0.1634$ . Male control mean variance: 0.280, 0.023. Female control mean variance: 0.112, 0.001. Male OT+A5i mean, variance: 0.325, 0.019. Female OT+A5i mean, variance: 0.171, 0.015.

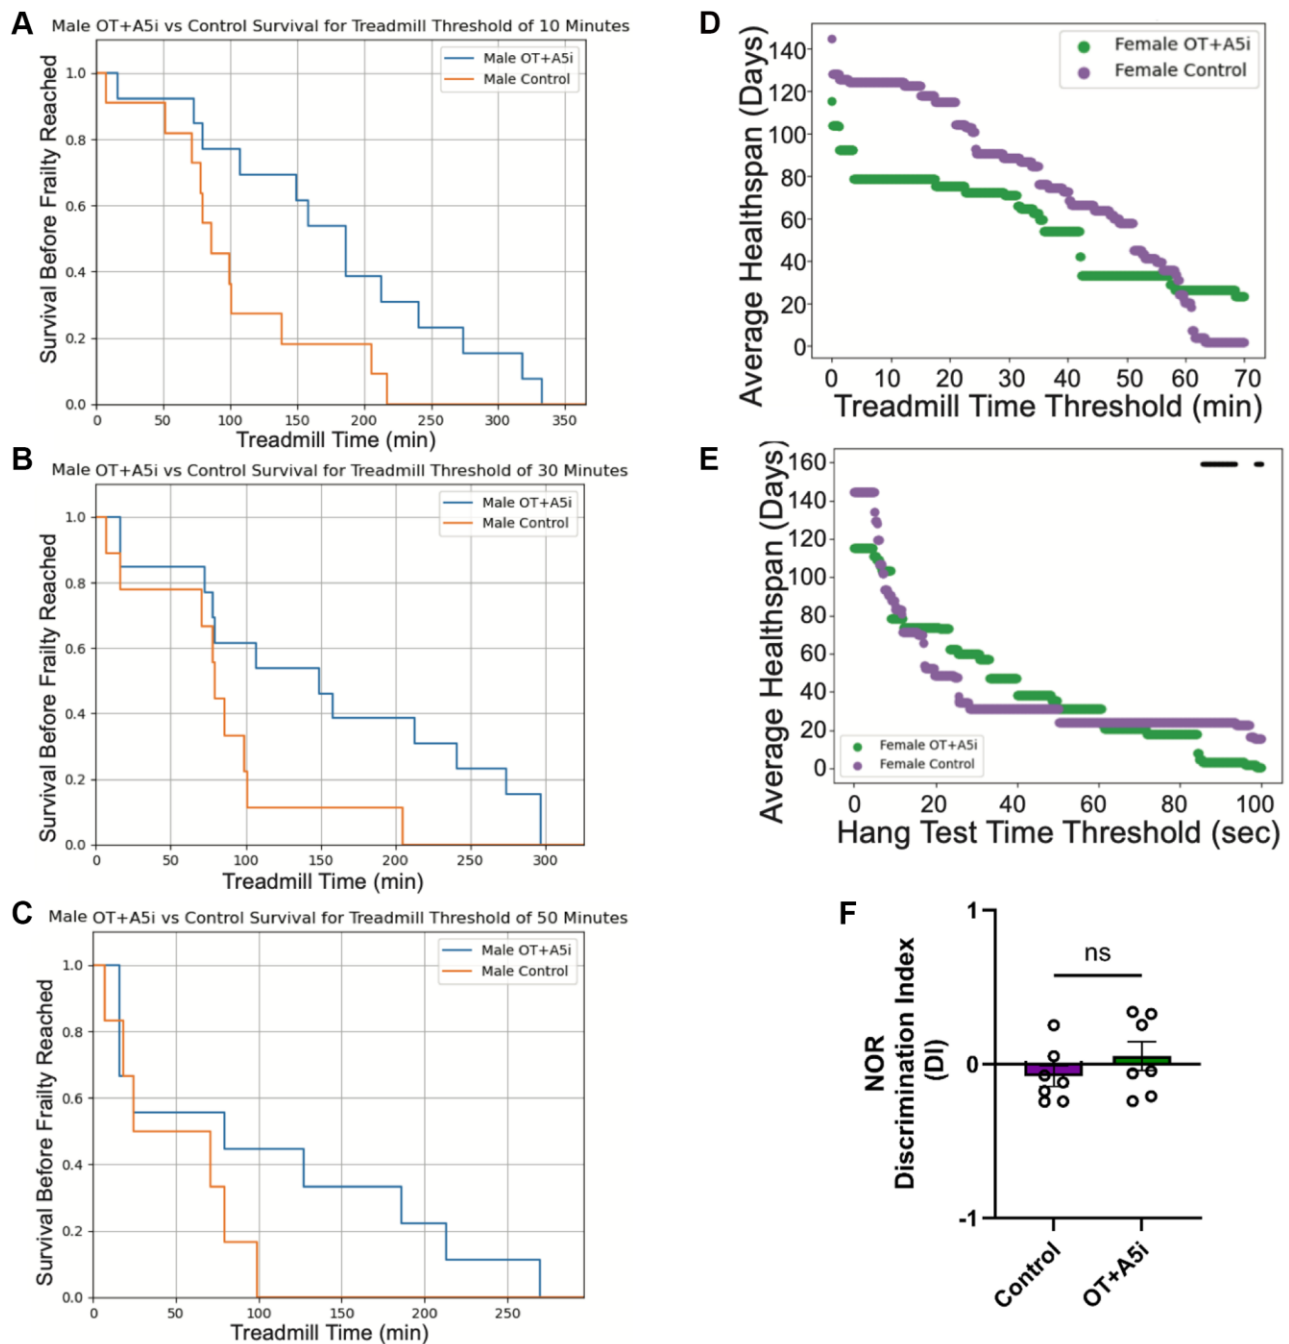

**Supplementary Figure 3. Additional individual health parameters of old male and female mice.** (A) Kaplan-Meier plot demonstrating the healthspan of the old male mice before they reach a healthspan threshold of a 10-minute running endurance. Average healthspan of controls = 102.9 days. Average healthspan of OT+A5i: 179.5 days. Control  $N = 12$  and OT+A5i  $N = 14$ . ( $*p = 0.0204$ ). (B) Kaplan-Meier plot on the healthspan of old male mice before they reach a healthspan threshold of a 30-minute running endurance. Average healthspan of controls = 82.4 days. Average healthspan of OT+A5i: 153.7 days. Control  $N = 12$  and OT+A5i  $N = 14$ . ( $*p = 0.0311$ ). (C) Kaplan-Meier plot demonstrating the healthspan of old male mice before they reach a healthspan threshold of a 50-minute running endurance. Average healthspan of controls = 49.7 days. Average healthspan of OT+A5i: 105.2 days. Control  $N = 12$  and OT+A5i  $N = 14$ . ( $*p = 0.1544$ : not statistically significant). (D) The average healthspans of OT+A5i and control old female mice across the range of treadmill running time thresholds from 0 to 70 minutes. Control  $N = 13$  and OT+A5i  $N = 10$ . There were no thresholds at which a statistically significant difference was observed. (E) The average healthspans of OT+A5i and control old female mice across the range of hang test time thresholds from 0 to 100 seconds. Control  $N = 13$  and OT+A5i  $N = 10$ . There were no thresholds at which a statistically significant difference was observed. (F) NOR test results for the old female mice at 4 months of OT/A5i. There was no statistical significance for novel object preference at 4-months of OT+A5i vs. HBSS administration. (Unpaired  $t$ -test  $p = 0.4139$ ). OT/A5i  $N = 7$ , Control  $N = 7$ .

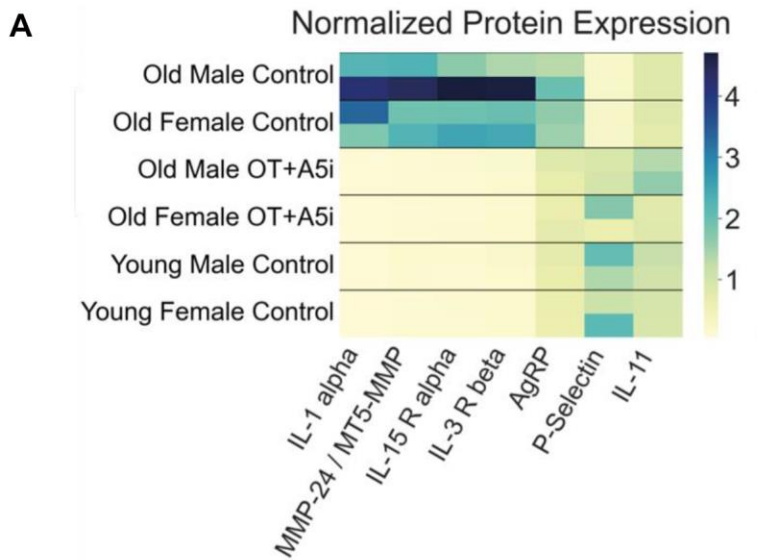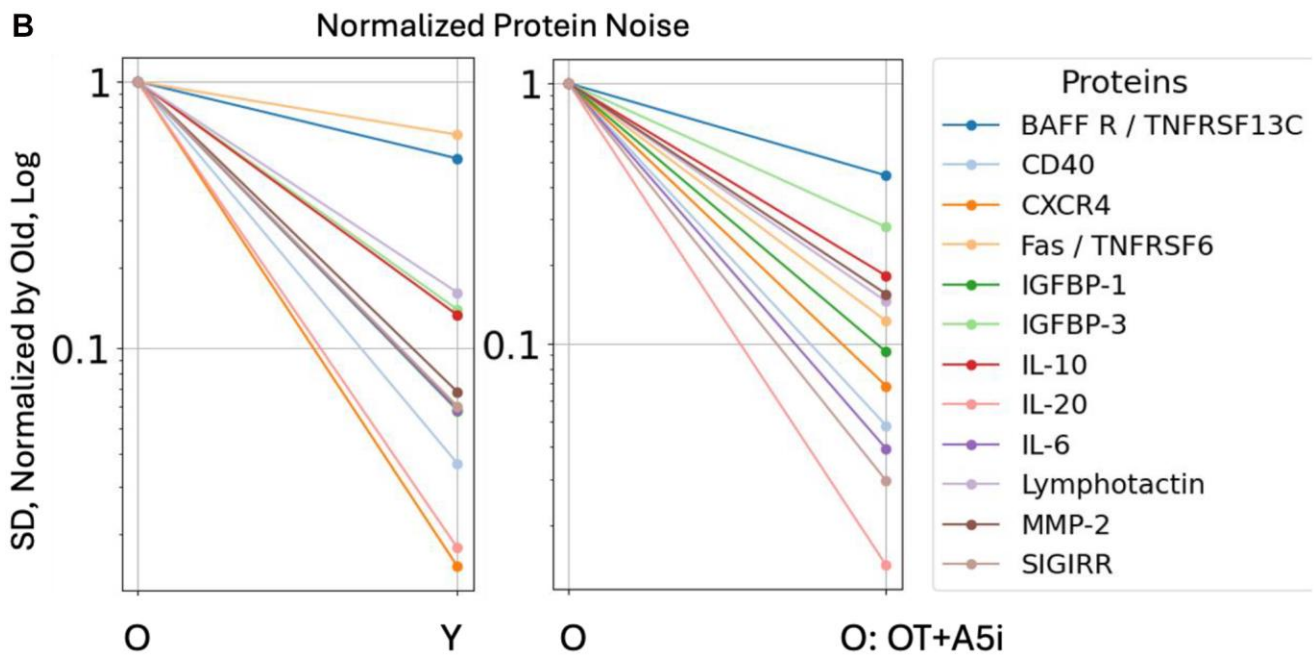

**Supplementary Figure 4. Additional comparative proteomics analyses.** (A) Heatmap of the designated by sex, differentially expressed *de-novo* synthesized proteins of control young, control old and OT+A5i treated old mice; IL-11 levels that are NS-not statistically different between the cohorts are also shown. (B) Combined for male and female mice comparison of the mean SDs of the proteins with lower noise in young and Old OT+A5i compared to old AHA-treated control groups, normalized by old control.

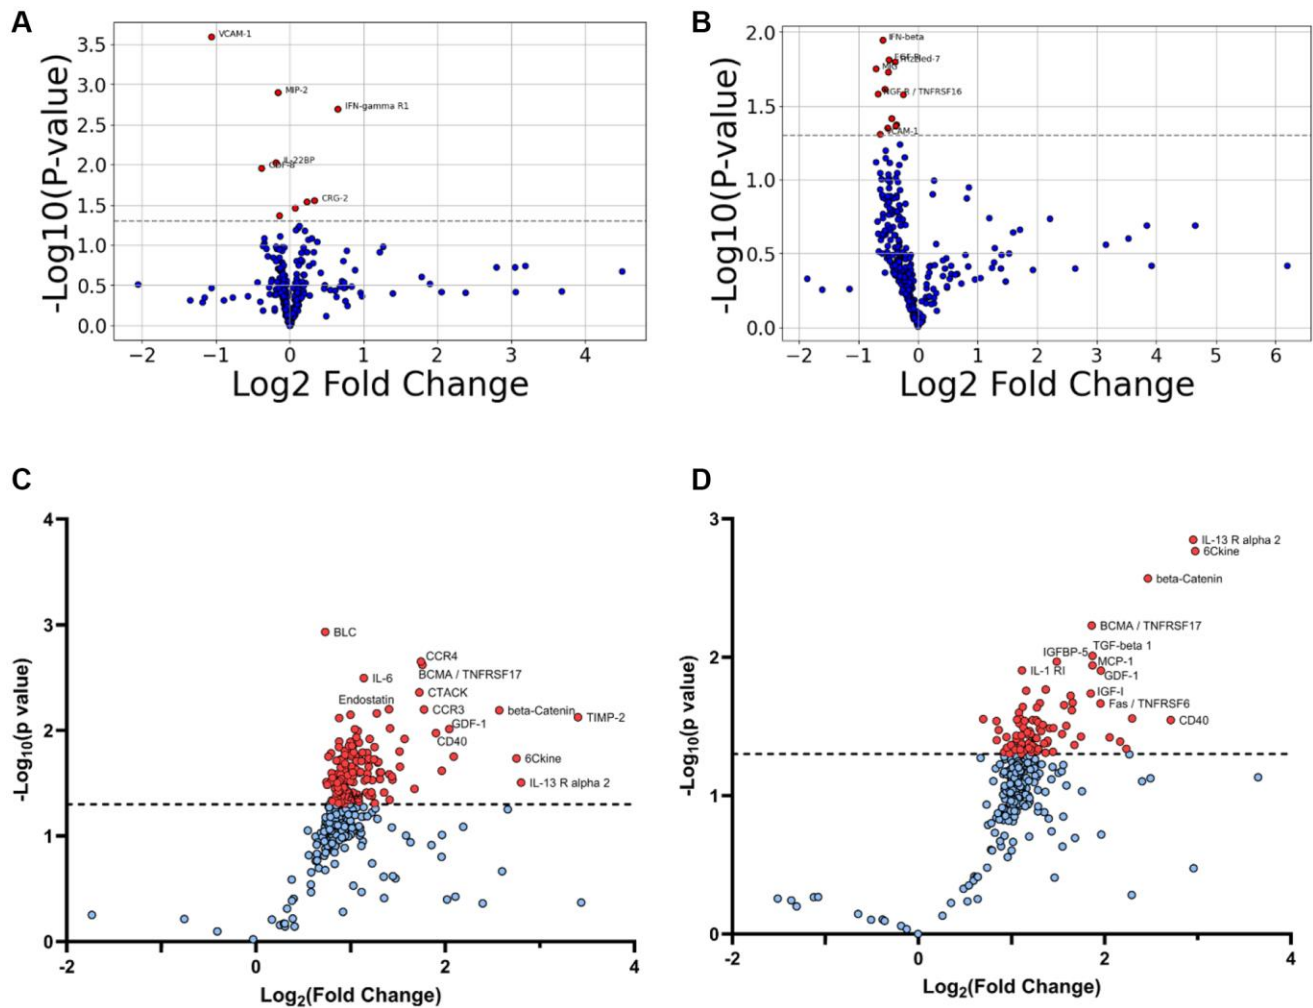

**Supplementary Figure 5. Volcano plots on *de-novo* comparative BONCAT proteomics of sedentary old male and female mice at 7 days of OT+A5i or vehicle control.** (A) Significant DEPs of female sedentary mice. (B) Significant DEPs of male sedentary mice. (C) Significant DEPs of female exercised mice. (D) Significant DEPs of male exercised mice. Red dots represent proteins with  $p < 0.05$  OT+A5i vs. vehicle control; protein names and fold changes are shown.  $n = 16$ ; 4 animals of each cohort: males control, females control, males OT+A5i, females OT+A5i.
