# Supplementary material for: Sex-specific longitudinal reversal of aging in old frail mice
Source: publisher site journal article supplement (doi:10.18632/aging.206304), 2025-08-21
Supplement: Supplementary file [file aging-v17-206304-supplementary-material-SD2.pdf]

## SUPPLEMENTARY TABLE

**Supplementary Table 1. Effects of OT+A5i on fertility of 8–12-month-old mice.**

| Female age, months | Treatment | Number of females | Number of pups born | Number of pups weaned |
|--------------------|-----------|-------------------|---------------------|-----------------------|
| 8                  | HBSS      | 4                 | 5                   | 1                     |
| 8                  | OT+A5i    | 5                 | 12                  | 5                     |
| 10                 | HBSS      | 4                 | 0                   | 0                     |
| 10                 | OT+A5i    | 5                 | 9                   | 8                     |
| 12                 | HBSS      | 4                 | 5                   | 0                     |
| 12                 | OT+A5i    | 5                 | 7                   | 3                     |

Female mice of the indicted ages (8, 10, 12 months) were administered with either HBSS control vehicle or OT+A5i every day for 7 days. The female mice were bred with young (3–7 mo) male mice at 8, 10 and 12 months of age. The pups born and the pups successfully weaned per cohort are shown. Control *N* = 4 and OT+A5i *N* = 5.
